# Supplementary material
Source: ML conference proceedings conference paper supplement (https://aclanthology.org/2024.emnlp-main.419)
Supplement: software [file 2024.emnlp-main.419.software.zip]

## Sheet: sheet
id	instance_index	instance_id	prompt	model_a	model_b	completion_a	completion_b	completion_a_is_acceptable	completion_b_is_acceptable	preference	instance_quality	comment	evaluator	timestamp
213	0	user_oriented_task_2	Rewrite the given text and correct grammar, spelling, and punctuation errors. If you'd told me year ago that today I would finish a marathon, I would of laughed. Your support had a huge affect on me!	tulu_65B	chatgpt	If you'd told me a year ago that today I would finish a marathon, I would have laughed. Your support had a huge effect on me!	If you had told me a year ago that today I would finish a marathon, I would have laughed. Your support had a huge effect on me!	yes	yes	a-is-better			yo	2023-05-19 13:11:45
1151	0	user_oriented_task_2	Rewrite the given text and correct grammar, spelling, and punctuation errors. If you'd told me year ago that today I would finish a marathon, I would of laughed. Your support had a huge affect on me!	tulu_65B	chatgpt	If you'd told me a year ago that today I would finish a marathon, I would have laughed. Your support had a huge effect on me!	If you had told me a year ago that today I would finish a marathon, I would have laughed. Your support had a huge effect on me!	yes	yes	tie			yu	2023-05-30 04:34:19
214	1	user_oriented_task_23	Design a skill assessment questioner for R (Programming Language).	tulu_65B	chatgpt	Sure, here is a sample skill assessment questionnaire for R programming language: 1. What is the difference between a vector and a matrix in R? 2. How do you create a function in R? 3. What is the purpose of the "apply" family of functions in R? 4. How do you handle missing data in R? 5. What is the difference between a data frame and a tibble in R? 6. How do you create a scatterplot in R? 7. Wha…	1. What is R used for? a. Data analysis and statistical computing b. Web development c. Mobile app development d. Game development 2. What is the syntax for creating a vector in R? a. vector_name <- c(element1, element2, element3) b. vector_name = c(element1, element2, element3) c. vector_name = [element1, element2, element3] d. vector_name <- [element1, element2, element3] 3. What is the functio…	yes	yes	a-is-better			yo	2023-05-19 13:13:35
1152	1	user_oriented_task_23	Design a skill assessment questioner for R (Programming Language).	chatgpt	tulu_65B	1. What is R used for? a. Data analysis and statistical computing b. Web development c. Mobile app development d. Game development 2. What is the syntax for creating a vector in R? a. vector_name <- c(element1, element2, element3) b. vector_name = c(element1, element2, element3) c. vector_name = [element1, element2, element3] d. vector_name <- [element1, element2, element3] 3. What is the functio…	Sure, here is a sample skill assessment questionnaire for R programming language: 1. What is the difference between a vector and a matrix in R? 2. How do you create a function in R? 3. What is the purpose of the "apply" family of functions in R? 4. How do you handle missing data in R? 5. What is the difference between a data frame and a tibble in R? 6. How do you create a scatterplot in R? 7. Wha…	yes	yes	a-is-slightly-better			yu	2023-05-30 04:34:58
215	2	user_oriented_task_162	Take a look at the contract and extract the parties of the agreement from it. As of the 13th day of December 2021, this Music Recording Agreement ("Agreement") is made between Good Kid, a Toronto-based musical group ("Artist"), and Universal Music Group, a record label with license number 545345 ("Record Label"). The Artist and the Recording Label may be referred to in this Agreement individually…	chatgpt	tulu_65B	The parties of the agreement are Good Kid (the Artist) and Universal Music Group (the Record Label).	The parties of the agreement are Good Kid and Universal Music Group.	yes	yes	a-is-slightly-better			yo	2023-05-19 13:14:21
1153	2	user_oriented_task_162	Take a look at the contract and extract the parties of the agreement from it. As of the 13th day of December 2021, this Music Recording Agreement ("Agreement") is made between Good Kid, a Toronto-based musical group ("Artist"), and Universal Music Group, a record label with license number 545345 ("Record Label"). The Artist and the Recording Label may be referred to in this Agreement individually…	chatgpt	tulu_65B	The parties of the agreement are Good Kid (the Artist) and Universal Music Group (the Record Label).	The parties of the agreement are Good Kid and Universal Music Group.	yes	yes	tie			yu	2023-05-30 04:35:18
216	3	user_oriented_task_184	Decide if the given email belongs to the Promotions or Social category. Subject: You have an invitation Email: Hi, I'd like to join your LinkedIn network.	tulu_7B	tulu_65B	The email belongs to the Social category.	Social	yes	yes	a-is-slightly-better			yo	2023-05-19 13:15:24
1154	3	user_oriented_task_184	Decide if the given email belongs to the Promotions or Social category. Subject: You have an invitation Email: Hi, I'd like to join your LinkedIn network.	tulu_65B	tulu_7B	Social	The email belongs to the Social category.	yes	yes	a-is-slightly-better			yu	2023-05-30 04:36:06
217	4	user_oriented_task_123	Plan an agenda for the daily standup meetings. Assign a time duration to each topic on the agenda.	tulu_65B	tulu_7B	Here is a sample agenda for a daily standup meeting: 1. Welcome and opening remarks (2 minutes) 2. Review of yesterday's accomplishments (2 minutes) 3. Discussion of today's tasks and goals (4 minutes) 4. Identification of any roadblocks or challenges (2 minutes) 5. Open discussion and feedback (2 minutes) 6. Closing remarks and next steps (2 minutes) Total time: 18 minutes. Note: The time durati…	Daily standup meetings are an important part of any project management process. Here is an example of an agenda for a daily standup meeting: 1. Welcome and opening remarks (5 minutes) 2. Project status update (10 minutes) 3. Task assignments and progress updates (10 minutes) 4. Blockers and roadblocks (5 minutes) 5. Next steps and action items (5 minutes) 6. Closing remarks and next meeting time …	yes	yes	b-is-slightly-better			yo	2023-05-19 13:17:48
1155	4	user_oriented_task_123	Plan an agenda for the daily standup meetings. Assign a time duration to each topic on the agenda.	tulu_7B	tulu_65B	Daily standup meetings are an important part of any project management process. Here is an example of an agenda for a daily standup meeting: 1. Welcome and opening remarks (5 minutes) 2. Project status update (10 minutes) 3. Task assignments and progress updates (10 minutes) 4. Blockers and roadblocks (5 minutes) 5. Next steps and action items (5 minutes) 6. Closing remarks and next meeting time …	Here is a sample agenda for a daily standup meeting: 1. Welcome and opening remarks (2 minutes) 2. Review of yesterday's accomplishments (2 minutes) 3. Discussion of today's tasks and goals (4 minutes) 4. Identification of any roadblocks or challenges (2 minutes) 5. Open discussion and feedback (2 minutes) 6. Closing remarks and next steps (2 minutes) Total time: 18 minutes. Note: The time durati…	yes	yes	a-is-slightly-better			yu	2023-05-30 04:36:43
30	5	user_oriented_task_105	Please list the courses that someone interested in the first course might like. Bitcoin and Cryptocurrency Technologies	tulu_7B	tulu_65B	Here are some courses that someone interested in the first course, "Bitcoin and Cryptocurrency Technologies," might like: 1. Introduction to Bitcoin and Cryptocurrency Technologies - This course provides an overview of the underlying technologies that make up cryptocurrencies, including blockchain, consensus algorithms, and smart contracts. 2. Bitcoin and Cryptocurrency Mining - This course cover…	Someone interested in the "Bitcoin and Cryptocurrency Technologies" course might also be interested in the following courses: 1. Introduction to Blockchain: This course provides an overview of blockchain technology, including its history, applications, and potential impact on various industries. 2. Cryptocurrency Investment and Trading: This course covers the basics of investing and trading crypt…	yes	yes	b-is-slightly-better			yi	2023-05-18 20:15:01
218	5	user_oriented_task_105	Please list the courses that someone interested in the first course might like. Bitcoin and Cryptocurrency Technologies	tulu_65B	tulu_7B	Someone interested in the "Bitcoin and Cryptocurrency Technologies" course might also be interested in the following courses: 1. Introduction to Blockchain: This course provides an overview of blockchain technology, including its history, applications, and potential impact on various industries. 2. Cryptocurrency Investment and Trading: This course covers the basics of investing and trading crypt…	Here are some courses that someone interested in the first course, "Bitcoin and Cryptocurrency Technologies," might like: 1. Introduction to Bitcoin and Cryptocurrency Technologies - This course provides an overview of the underlying technologies that make up cryptocurrencies, including blockchain, consensus algorithms, and smart contracts. 2. Bitcoin and Cryptocurrency Mining - This course cover…	yes	yes	a-is-slightly-better			yo	2023-05-19 13:18:44
1156	5	user_oriented_task_105	Please list the courses that someone interested in the first course might like. Bitcoin and Cryptocurrency Technologies	tulu_65B	tulu_7B	Someone interested in the "Bitcoin and Cryptocurrency Technologies" course might also be interested in the following courses: 1. Introduction to Blockchain: This course provides an overview of blockchain technology, including its history, applications, and potential impact on various industries. 2. Cryptocurrency Investment and Trading: This course covers the basics of investing and trading crypt…	Here are some courses that someone interested in the first course, "Bitcoin and Cryptocurrency Technologies," might like: 1. Introduction to Bitcoin and Cryptocurrency Technologies - This course provides an overview of the underlying technologies that make up cryptocurrencies, including blockchain, consensus algorithms, and smart contracts. 2. Bitcoin and Cryptocurrency Mining - This course cover…	yes	yes	tie			yu	2023-05-30 04:58:07
178	6	user_oriented_task_136	Choose the best books from the given genre. Crime & Mystery	tulu_7B	tulu_65B	1. The Adventures of Sherlock Holmes by Sir Arthur Conan Doyle 2. The Hound of the Baskervilles by Sir Arthur Conan Doyle 3. The Maltese Falcon by Dashiell Hammett 4. The Name of the Rose by Umberto Eco 5. The Wire by Michael B. Jordan 6. The Godfather by Mario Puzo 7. The Silence of the Lambs by Thomas Harris 8. The Devil in the White City by Erik Larson 9. The Stranger by Albert Camus 10. The P…	1. "The Adventures of Sherlock Holmes" by Sir Arthur Conan Doyle 2. "The Hound of the Baskervilles" by Sir Arthur Conan Doyle 3. "The Maltese Falcon" by Dashiell Hammett 4. "The Big Sleep" by Raymond Chandler 5. "The Name of the Rose" by Umberto Eco 6. "The Silence of the Lambs" by Thomas Harris 7. "The Girl with the Dragon Tattoo" by Stieg Larsson 8. "The Da Vinci Code" by Dan Brown 9. "The Murd…	no	yes	b-is-slightly-better			yi	2023-05-19 06:15:26
219	6	user_oriented_task_136	Choose the best books from the given genre. Crime & Mystery	tulu_65B	tulu_7B	1. "The Adventures of Sherlock Holmes" by Sir Arthur Conan Doyle 2. "The Hound of the Baskervilles" by Sir Arthur Conan Doyle 3. "The Maltese Falcon" by Dashiell Hammett 4. "The Big Sleep" by Raymond Chandler 5. "The Name of the Rose" by Umberto Eco 6. "The Silence of the Lambs" by Thomas Harris 7. "The Girl with the Dragon Tattoo" by Stieg Larsson 8. "The Da Vinci Code" by Dan Brown 9. "The Murd…	1. The Adventures of Sherlock Holmes by Sir Arthur Conan Doyle 2. The Hound of the Baskervilles by Sir Arthur Conan Doyle 3. The Maltese Falcon by Dashiell Hammett 4. The Name of the Rose by Umberto Eco 5. The Wire by Michael B. Jordan 6. The Godfather by Mario Puzo 7. The Silence of the Lambs by Thomas Harris 8. The Devil in the White City by Erik Larson 9. The Stranger by Albert Camus 10. The P…	yes	no	a-is-better			yo	2023-05-19 13:19:31
1157	6	user_oriented_task_136	Choose the best books from the given genre. Crime & Mystery	tulu_65B	tulu_7B	1. "The Adventures of Sherlock Holmes" by Sir Arthur Conan Doyle 2. "The Hound of the Baskervilles" by Sir Arthur Conan Doyle 3. "The Maltese Falcon" by Dashiell Hammett 4. "The Big Sleep" by Raymond Chandler 5. "The Name of the Rose" by Umberto Eco 6. "The Silence of the Lambs" by Thomas Harris 7. "The Girl with the Dragon Tattoo" by Stieg Larsson 8. "The Da Vinci Code" by Dan Brown 9. "The Murd…	1. The Adventures of Sherlock Holmes by Sir Arthur Conan Doyle 2. The Hound of the Baskervilles by Sir Arthur Conan Doyle 3. The Maltese Falcon by Dashiell Hammett 4. The Name of the Rose by Umberto Eco 5. The Wire by Michael B. Jordan 6. The Godfather by Mario Puzo 7. The Silence of the Lambs by Thomas Harris 8. The Devil in the White City by Erik Larson 9. The Stranger by Albert Camus 10. The P…	yes	yes	tie			yu	2023-05-30 04:58:19
179	7	vicuna_24	As a superhero, how would you explain your origin story to a curious child?	tulu_7B	tulu_65B	I would explain that I was born with special powers and a mission to protect the people of my city. I use my powers to fight against evil and make the world a better place. I am always ready to answer the call and use my powers for good.	As a superhero, I would explain my origin story to a curious child in a way that is easy for them to understand and exciting for them to hear. I would start by telling them about how I was just an ordinary person, but then something extraordinary happened that gave me my super powers. I would explain how I was on a mission to save the world, and how I had to use my powers to defeat the bad guys a…	yes	yes	b-is-better			yi	2023-05-19 06:21:29
220	7	vicuna_24	As a superhero, how would you explain your origin story to a curious child?	tulu_65B	tulu_7B	As a superhero, I would explain my origin story to a curious child in a way that is easy for them to understand and exciting for them to hear. I would start by telling them about how I was just an ordinary person, but then something extraordinary happened that gave me my super powers. I would explain how I was on a mission to save the world, and how I had to use my powers to defeat the bad guys a…	I would explain that I was born with special powers and a mission to protect the people of my city. I use my powers to fight against evil and make the world a better place. I am always ready to answer the call and use my powers for good.	yes	yes	a-is-slightly-better			yo	2023-05-19 13:20:06
1158	7	vicuna_24	As a superhero, how would you explain your origin story to a curious child?	tulu_7B	tulu_65B	I would explain that I was born with special powers and a mission to protect the people of my city. I use my powers to fight against evil and make the world a better place. I am always ready to answer the call and use my powers for good.	As a superhero, I would explain my origin story to a curious child in a way that is easy for them to understand and exciting for them to hear. I would start by telling them about how I was just an ordinary person, but then something extraordinary happened that gave me my super powers. I would explain how I was on a mission to save the world, and how I had to use my powers to defeat the bad guys a…	yes	yes	b-is-better			yu	2023-05-30 04:58:30
180	8	user_oriented_task_195	You are given a Python command and are required to convert it into Ruby. print("Hello World!")	tulu_65B	tulu_7B	puts "Hello World!"	puts "Hello World!"	yes	yes	tie			yi	2023-05-19 06:22:09
221	8	user_oriented_task_195	You are given a Python command and are required to convert it into Ruby. print("Hello World!")	tulu_65B	tulu_7B	puts "Hello World!"	puts "Hello World!"	yes	yes	tie			yo	2023-05-19 13:20:24
1159	8	user_oriented_task_195	You are given a Python command and are required to convert it into Ruby. print("Hello World!")	tulu_65B	tulu_7B	puts "Hello World!"	puts "Hello World!"	yes	yes	tie			yu	2023-05-30 04:59:02
181	9	user_oriented_task_121	Write a to-do list based on the given information. Daily tasks in the pharmacy	tulu_65B	tulu_7B	Here is a to-do list for daily tasks in the pharmacy: 1. Restock shelves with medications and supplies 2. Check expiration dates and properly dispose of expired medications 3. Verify prescriptions and fill orders accurately 4. Maintain proper record-keeping and inventory management 5. Assist customers with questions and concerns about medications 6. Keep the pharmacy clean and organized 7. Follow…	Here is a to-do list based on the given information: 1. Check inventory and restock as needed 2. Refill prescriptions 3. Answer phones and take messages 4. Prepare and dispense medications 5. Clean and organize the pharmacy 6. Order supplies and maintain equipment 7. File and maintain patient records 8. Communicate with doctors and other healthcare providers 9. Assist customers with questions or …	yes	yes	a-is-slightly-better			yi	2023-05-19 06:24:39
222	9	user_oriented_task_121	Write a to-do list based on the given information. Daily tasks in the pharmacy	tulu_65B	tulu_7B	Here is a to-do list for daily tasks in the pharmacy: 1. Restock shelves with medications and supplies 2. Check expiration dates and properly dispose of expired medications 3. Verify prescriptions and fill orders accurately 4. Maintain proper record-keeping and inventory management 5. Assist customers with questions and concerns about medications 6. Keep the pharmacy clean and organized 7. Follow…	Here is a to-do list based on the given information: 1. Check inventory and restock as needed 2. Refill prescriptions 3. Answer phones and take messages 4. Prepare and dispense medications 5. Clean and organize the pharmacy 6. Order supplies and maintain equipment 7. File and maintain patient records 8. Communicate with doctors and other healthcare providers 9. Assist customers with questions or …	yes	yes	a-is-slightly-better			yo	2023-05-19 13:21:10
1160	9	user_oriented_task_121	Write a to-do list based on the given information. Daily tasks in the pharmacy	tulu_7B	tulu_65B	Here is a to-do list based on the given information: 1. Check inventory and restock as needed 2. Refill prescriptions 3. Answer phones and take messages 4. Prepare and dispense medications 5. Clean and organize the pharmacy 6. Order supplies and maintain equipment 7. File and maintain patient records 8. Communicate with doctors and other healthcare providers 9. Assist customers with questions or …	Here is a to-do list for daily tasks in the pharmacy: 1. Restock shelves with medications and supplies 2. Check expiration dates and properly dispose of expired medications 3. Verify prescriptions and fill orders accurately 4. Maintain proper record-keeping and inventory management 5. Assist customers with questions and concerns about medications 6. Keep the pharmacy clean and organized 7. Follow…	yes	yes	b-is-slightly-better			yu	2023-05-30 05:00:16
182	10	user_oriented_task_68	Choosing a name for your product or business YouTube channel is an important part of the process. Based on the description of the product or business, you should come up with some interesting names. Take some time to brainstorm your ideas. Here you will find videos and content that will help students prepare for the application process to graduate schools as well as how to apply to graduate schoo…	tulu_65B	tulu_7B	1. Grad School Prep 2. The Grad School Application 3. Mastering the Grad School Application 4. The Grad School Application Journey 5. The Grad School Application Blueprint 6. The Grad School Application Roadmap 7. The Grad School Application Trailblazers 8. The Grad School Application Navigator 9. The Grad School Application Compass 10. The Grad School Application Guidebook	​	yes	no	a-is-better			yi	2023-05-19 06:25:20
223	10	user_oriented_task_68	Choosing a name for your product or business YouTube channel is an important part of the process. Based on the description of the product or business, you should come up with some interesting names. Take some time to brainstorm your ideas. Here you will find videos and content that will help students prepare for the application process to graduate schools as well as how to apply to graduate schoo…	tulu_65B	tulu_7B	1. Grad School Prep 2. The Grad School Application 3. Mastering the Grad School Application 4. The Grad School Application Journey 5. The Grad School Application Blueprint 6. The Grad School Application Roadmap 7. The Grad School Application Trailblazers 8. The Grad School Application Navigator 9. The Grad School Application Compass 10. The Grad School Application Guidebook	​	yes	no	a-is-better			yo	2023-05-19 13:21:21
1161	10	user_oriented_task_68	Choosing a name for your product or business YouTube channel is an important part of the process. Based on the description of the product or business, you should come up with some interesting names. Take some time to brainstorm your ideas. Here you will find videos and content that will help students prepare for the application process to graduate schools as well as how to apply to graduate schoo…	tulu_7B	tulu_65B	​	1. Grad School Prep 2. The Grad School Application 3. Mastering the Grad School Application 4. The Grad School Application Journey 5. The Grad School Application Blueprint 6. The Grad School Application Roadmap 7. The Grad School Application Trailblazers 8. The Grad School Application Navigator 9. The Grad School Application Compass 10. The Grad School Application Guidebook	no	yes	b-is-better			yu	2023-05-30 05:00:30
183	11	user_oriented_task_172	Provide a list of the skills that may help you find the job. Crew Members	tulu_65B	tulu_7B	Here are some skills that may help you find a job as a Crew Member: 1. Customer service skills 2. Teamwork and collaboration 3. Attention to detail and accuracy 4. Time management and organization 5. Ability to follow instructions and procedures 6. Flexibility and adaptability 7. Strong communication skills 8. Basic math skills for handling money and making change 9. Physical stamina and ability …	Here are some skills that may help you find a job as a crew member: 1. Communication skills: The ability to communicate effectively with your team members, supervisors, and customers is essential. 2. Time management: Crew members need to be able to manage their time effectively to ensure that tasks are completed on time. 3. Attention to detail: Crew members need to be detail-oriented to ensure th…	yes	yes	b-is-slightly-better			yi	2023-05-19 06:43:09
224	11	user_oriented_task_172	Provide a list of the skills that may help you find the job. Crew Members	tulu_65B	tulu_7B	Here are some skills that may help you find a job as a Crew Member: 1. Customer service skills 2. Teamwork and collaboration 3. Attention to detail and accuracy 4. Time management and organization 5. Ability to follow instructions and procedures 6. Flexibility and adaptability 7. Strong communication skills 8. Basic math skills for handling money and making change 9. Physical stamina and ability …	Here are some skills that may help you find a job as a crew member: 1. Communication skills: The ability to communicate effectively with your team members, supervisors, and customers is essential. 2. Time management: Crew members need to be able to manage their time effectively to ensure that tasks are completed on time. 3. Attention to detail: Crew members need to be detail-oriented to ensure th…	yes	yes	tie			yo	2023-05-19 13:23:13
1162	11	user_oriented_task_172	Provide a list of the skills that may help you find the job. Crew Members	tulu_65B	tulu_7B	Here are some skills that may help you find a job as a Crew Member: 1. Customer service skills 2. Teamwork and collaboration 3. Attention to detail and accuracy 4. Time management and organization 5. Ability to follow instructions and procedures 6. Flexibility and adaptability 7. Strong communication skills 8. Basic math skills for handling money and making change 9. Physical stamina and ability …	Here are some skills that may help you find a job as a crew member: 1. Communication skills: The ability to communicate effectively with your team members, supervisors, and customers is essential. 2. Time management: Crew members need to be able to manage their time effectively to ensure that tasks are completed on time. 3. Attention to detail: Crew members need to be detail-oriented to ensure th…	yes	yes	b-is-slightly-better			yu	2023-05-30 05:00:46
184	12	user_oriented_task_139	Indicate the genre of the book to which it belongs. Love in the Time of Cholera	tulu_65B	tulu_7B	Love in the Time of Cholera is a novel that belongs to the genre of literary fiction, specifically, magical realism.	The genre of the book "Love in the Time of Cholera" by Gabriel García Márquez is romance and magical realism.	yes	yes	a-is-slightly-better			yi	2023-05-19 06:47:28
225	12	user_oriented_task_139	Indicate the genre of the book to which it belongs. Love in the Time of Cholera	tulu_7B	tulu_65B	The genre of the book "Love in the Time of Cholera" by Gabriel García Márquez is romance and magical realism.	Love in the Time of Cholera is a novel that belongs to the genre of literary fiction, specifically, magical realism.	yes	yes	tie			yo	2023-05-19 13:24:11
1163	12	user_oriented_task_139	Indicate the genre of the book to which it belongs. Love in the Time of Cholera	tulu_65B	tulu_7B	Love in the Time of Cholera is a novel that belongs to the genre of literary fiction, specifically, magical realism.	The genre of the book "Love in the Time of Cholera" by Gabriel García Márquez is romance and magical realism.	yes	yes	tie			yu	2023-05-30 05:01:02
185	13	user_oriented_task_251	Explain the meaning of the given phrase in simple terms. Use an example if possible. It would be helpful if you could give an example. "With a little give in them"	chatgpt	tulu_65B	This phrase means that something is flexible or can be adjusted slightly. For example, if a pair of shoes has "a little give in them," it means that they are not too tight and can stretch a bit to fit comfortably.	The phrase "with a little give in them" means that something is flexible or has some room for negotiation. It can also mean that there is some leeway or that the rules can be bent a little. For example, imagine that you are trying to buy a car from a dealership. The salesperson tells you that the price is non-negotiable, but you really want the car. In this situation, you might say to the salespe…	yes	yes	b-is-slightly-better			yi	2023-05-19 06:51:40
226	13	user_oriented_task_251	Explain the meaning of the given phrase in simple terms. Use an example if possible. It would be helpful if you could give an example. "With a little give in them"	chatgpt	tulu_65B	This phrase means that something is flexible or can be adjusted slightly. For example, if a pair of shoes has "a little give in them," it means that they are not too tight and can stretch a bit to fit comfortably.	The phrase "with a little give in them" means that something is flexible or has some room for negotiation. It can also mean that there is some leeway or that the rules can be bent a little. For example, imagine that you are trying to buy a car from a dealership. The salesperson tells you that the price is non-negotiable, but you really want the car. In this situation, you might say to the salespe…	yes	yes	b-is-slightly-better			yo	2023-05-19 13:24:50
1164	13	user_oriented_task_251	Explain the meaning of the given phrase in simple terms. Use an example if possible. It would be helpful if you could give an example. "With a little give in them"	tulu_65B	chatgpt	The phrase "with a little give in them" means that something is flexible or has some room for negotiation. It can also mean that there is some leeway or that the rules can be bent a little. For example, imagine that you are trying to buy a car from a dealership. The salesperson tells you that the price is non-negotiable, but you really want the car. In this situation, you might say to the salespe…	This phrase means that something is flexible or can be adjusted slightly. For example, if a pair of shoes has "a little give in them," it means that they are not too tight and can stretch a bit to fit comfortably.	yes	yes	a-is-slightly-better			yu	2023-05-30 05:01:12
190	14	user_oriented_task_116	Develop a mental exercise that can help people manage their anxiety and explain how it works.	tulu_7B	tulu_65B	One mental exercise that can help people manage their anxiety is called "The Relaxation Response." This exercise was developed by Herbert Benson, MD, and involves a series of physical and mental techniques that can help individuals reduce stress and anxiety. The Relaxation Response exercise involves the following steps: 1. Find a quiet and comfortable place to sit or lie down. 2. Close your eyes …	One mental exercise that can help people manage their anxiety is called "Box Breathing." This technique involves visualizing a box while taking slow, deep breaths. Here's how it works: 1. Find a quiet and comfortable place to sit or lie down. 2. Close your eyes and take a deep breath in through your nose, counting to four. 3. Hold the breath for a count of four. 4. Exhale slowly through your mout…	yes	yes	tie			yi	2023-05-19 07:07:49
227	14	user_oriented_task_116	Develop a mental exercise that can help people manage their anxiety and explain how it works.	tulu_65B	tulu_7B	One mental exercise that can help people manage their anxiety is called "Box Breathing." This technique involves visualizing a box while taking slow, deep breaths. Here's how it works: 1. Find a quiet and comfortable place to sit or lie down. 2. Close your eyes and take a deep breath in through your nose, counting to four. 3. Hold the breath for a count of four. 4. Exhale slowly through your mout…	One mental exercise that can help people manage their anxiety is called "The Relaxation Response." This exercise was developed by Herbert Benson, MD, and involves a series of physical and mental techniques that can help individuals reduce stress and anxiety. The Relaxation Response exercise involves the following steps: 1. Find a quiet and comfortable place to sit or lie down. 2. Close your eyes …	yes	yes	tie			yo	2023-05-19 13:25:38
1165	14	user_oriented_task_116	Develop a mental exercise that can help people manage their anxiety and explain how it works.	tulu_7B	tulu_65B	One mental exercise that can help people manage their anxiety is called "The Relaxation Response." This exercise was developed by Herbert Benson, MD, and involves a series of physical and mental techniques that can help individuals reduce stress and anxiety. The Relaxation Response exercise involves the following steps: 1. Find a quiet and comfortable place to sit or lie down. 2. Close your eyes …	One mental exercise that can help people manage their anxiety is called "Box Breathing." This technique involves visualizing a box while taking slow, deep breaths. Here's how it works: 1. Find a quiet and comfortable place to sit or lie down. 2. Close your eyes and take a deep breath in through your nose, counting to four. 3. Hold the breath for a count of four. 4. Exhale slowly through your mout…	yes	yes	tie			yu	2023-05-30 05:02:20
193	15	user_oriented_task_187	Change the first person to the third person in the given sentence. The meaning should be kept, but you can paraphrase it or expand it in order to have a better pose. We were recently able to increase the amount of stock we hold with the same supplier thereby reducing our risk.	chatgpt	tulu_65B	Recently, the company was able to increase the amount of stock it holds with the same supplier, resulting in a reduction of risk.	They were recently able to increase the amount of stock they hold with the same supplier thereby reducing their risk.	yes	yes	b-is-slightly-better			yi	2023-05-19 07:10:55
228	15	user_oriented_task_187	Change the first person to the third person in the given sentence. The meaning should be kept, but you can paraphrase it or expand it in order to have a better pose. We were recently able to increase the amount of stock we hold with the same supplier thereby reducing our risk.	tulu_65B	chatgpt	They were recently able to increase the amount of stock they hold with the same supplier thereby reducing their risk.	Recently, the company was able to increase the amount of stock it holds with the same supplier, resulting in a reduction of risk.	yes	yes	b-is-slightly-better			yo	2023-05-19 13:26:12
1166	15	user_oriented_task_187	Change the first person to the third person in the given sentence. The meaning should be kept, but you can paraphrase it or expand it in order to have a better pose. We were recently able to increase the amount of stock we hold with the same supplier thereby reducing our risk.	tulu_65B	chatgpt	They were recently able to increase the amount of stock they hold with the same supplier thereby reducing their risk.	Recently, the company was able to increase the amount of stock it holds with the same supplier, resulting in a reduction of risk.	yes	yes	a-is-slightly-better			yu	2023-05-30 05:02:51
194	16	user_oriented_task_19	I bought two shirts from the store and each one cost me $10. I also bought a pair of pants and they cost me $20. Then, I bought a dress and it cost me $30. Also, I bought a pair of shoes and they cost me $40. Lastly, I bought a jacket and it cost me $50. Make a table chart showing items, the number, and the price of these items. Separate columns with "|".	tulu_7B	tulu_65B	|Item |Number |Price| |------|-------|-------| |Shirts|2|$10| |Pants|1|$20| |Dress|1|$30| |Shoes|1|$40| |Jacket|1|$50|	| Item | Number | Price | | --- | --- | --- | | Shirts | 2 | $10 | | Pants | 1 | $20 | | Dress | 1 | $30 | | Shoes | 1 | $40 | | Jacket | 1 | $50 |	yes	yes	tie			yi	2023-05-19 07:11:41
229	16	user_oriented_task_19	I bought two shirts from the store and each one cost me $10. I also bought a pair of pants and they cost me $20. Then, I bought a dress and it cost me $30. Also, I bought a pair of shoes and they cost me $40. Lastly, I bought a jacket and it cost me $50. Make a table chart showing items, the number, and the price of these items. Separate columns with "|".	tulu_7B	tulu_65B	|Item |Number |Price| |------|-------|-------| |Shirts|2|$10| |Pants|1|$20| |Dress|1|$30| |Shoes|1|$40| |Jacket|1|$50|	| Item | Number | Price | | --- | --- | --- | | Shirts | 2 | $10 | | Pants | 1 | $20 | | Dress | 1 | $30 | | Shoes | 1 | $40 | | Jacket | 1 | $50 |	yes	yes	b-is-slightly-better			yo	2023-05-19 13:26:54
1167	16	user_oriented_task_19	I bought two shirts from the store and each one cost me $10. I also bought a pair of pants and they cost me $20. Then, I bought a dress and it cost me $30. Also, I bought a pair of shoes and they cost me $40. Lastly, I bought a jacket and it cost me $50. Make a table chart showing items, the number, and the price of these items. Separate columns with "|".	tulu_7B	tulu_65B	|Item |Number |Price| |------|-------|-------| |Shirts|2|$10| |Pants|1|$20| |Dress|1|$30| |Shoes|1|$40| |Jacket|1|$50|	| Item | Number | Price | | --- | --- | --- | | Shirts | 2 | $10 | | Pants | 1 | $20 | | Dress | 1 | $30 | | Shoes | 1 | $40 | | Jacket | 1 | $50 |	yes	yes	tie			yu	2023-05-30 05:03:04
197	17	user_oriented_task_131	Describe how to prepare the given food in your own words. Note down the ingredients you will need and the steps you will take to prepare them. Chewy Chocolate Chip Cookies	tulu_65B	tulu_7B	To prepare Chewy Chocolate Chip Cookies, you will need the following ingredients: - 2 1/4 cups all-purpose flour - 1 tsp baking soda - 1 tsp salt - 1 cup unsalted butter, at room temperature - 3/4 cup white granulated sugar - 3/4 cup brown sugar - 2 large eggs - 2 tsp vanilla extract - 2 cups semisweet chocolate chips Here are the steps to prepare the cookies: 1. Preheat your oven to 375°F (190°C…	To prepare Chewy Chocolate Chip Cookies, you will need the following ingredients: - 2 1/4 cups all-purpose flour - 1 teaspoon baking soda - 1 teaspoon salt - 1 cup unsalted butter, softened - 3/4 cup white sugar - 3/4 cup brown sugar - 2 large eggs - 2 teaspoons vanilla extract - 2 cups semisweet chocolate chips Here are the steps to prepare the Chewy Chocolate Chip Cookies: 1. Preheat your oven …	yes	yes	tie			yi	2023-05-19 07:14:18
230	17	user_oriented_task_131	Describe how to prepare the given food in your own words. Note down the ingredients you will need and the steps you will take to prepare them. Chewy Chocolate Chip Cookies	tulu_65B	tulu_7B	To prepare Chewy Chocolate Chip Cookies, you will need the following ingredients: - 2 1/4 cups all-purpose flour - 1 tsp baking soda - 1 tsp salt - 1 cup unsalted butter, at room temperature - 3/4 cup white granulated sugar - 3/4 cup brown sugar - 2 large eggs - 2 tsp vanilla extract - 2 cups semisweet chocolate chips Here are the steps to prepare the cookies: 1. Preheat your oven to 375°F (190°C…	To prepare Chewy Chocolate Chip Cookies, you will need the following ingredients: - 2 1/4 cups all-purpose flour - 1 teaspoon baking soda - 1 teaspoon salt - 1 cup unsalted butter, softened - 3/4 cup white sugar - 3/4 cup brown sugar - 2 large eggs - 2 teaspoons vanilla extract - 2 cups semisweet chocolate chips Here are the steps to prepare the Chewy Chocolate Chip Cookies: 1. Preheat your oven …	yes	yes	a-is-slightly-better			yo	2023-05-19 13:27:39
1168	17	user_oriented_task_131	Describe how to prepare the given food in your own words. Note down the ingredients you will need and the steps you will take to prepare them. Chewy Chocolate Chip Cookies	tulu_7B	tulu_65B	To prepare Chewy Chocolate Chip Cookies, you will need the following ingredients: - 2 1/4 cups all-purpose flour - 1 teaspoon baking soda - 1 teaspoon salt - 1 cup unsalted butter, softened - 3/4 cup white sugar - 3/4 cup brown sugar - 2 large eggs - 2 teaspoons vanilla extract - 2 cups semisweet chocolate chips Here are the steps to prepare the Chewy Chocolate Chip Cookies: 1. Preheat your oven …	To prepare Chewy Chocolate Chip Cookies, you will need the following ingredients: - 2 1/4 cups all-purpose flour - 1 tsp baking soda - 1 tsp salt - 1 cup unsalted butter, at room temperature - 3/4 cup white granulated sugar - 3/4 cup brown sugar - 2 large eggs - 2 tsp vanilla extract - 2 cups semisweet chocolate chips Here are the steps to prepare the cookies: 1. Preheat your oven to 375°F (190°C…	yes	yes	tie			yu	2023-05-30 05:03:28
198	18	user_oriented_task_240	Rewrite the text and correct the spelling errors. It solves problems comon and uniqe to every team.	chatgpt	tulu_65B	It solves problems common and unique to every team.	It solves problems common and unique to every team.	yes	yes	tie			yi	2023-05-19 07:14:35
231	18	user_oriented_task_240	Rewrite the text and correct the spelling errors. It solves problems comon and uniqe to every team.	chatgpt	tulu_65B	It solves problems common and unique to every team.	It solves problems common and unique to every team.	yes	yes	tie			yo	2023-05-19 13:27:55
1169	18	user_oriented_task_240	Rewrite the text and correct the spelling errors. It solves problems comon and uniqe to every team.	chatgpt	tulu_65B	It solves problems common and unique to every team.	It solves problems common and unique to every team.	no	no	tie			yu	2023-05-30 05:04:00
201	19	user_oriented_task_211	Write an engaging and well-written property listing description for selling a house. Address of the house and some of the details are given to you. Fill in the information gap with hallucinations if needed. Property Address: 412 Monterey Ave, Capitola, CA 95010 Parking: 3 cars + a finished single car garage Details: - open floorplan - window with views to park/mountains - Kitchen with shaker cabi…	chatgpt	tulu_65B	Welcome to your dream home at 412 Monterey Ave in the charming coastal town of Capitola, CA. This stunning property boasts a spacious open floorplan that is perfect for entertaining guests or simply relaxing with your loved ones. As you step inside, you'll be greeted by an abundance of natural light that floods the space, thanks to the large windows that offer breathtaking views of the nearby par…	Welcome to 412 Monterey Ave, a stunning home located in the picturesque town of Capitola, CA. This beautiful property boasts an open floorplan, allowing for seamless entertaining and everyday living. The spacious living room features a large window with breathtaking views of the park and mountains, providing a serene and tranquil atmosphere. The kitchen is a chef's dream, with shaker cabinetry an…	yes	yes	tie			yi	2023-05-19 07:23:31
232	19	user_oriented_task_211	Write an engaging and well-written property listing description for selling a house. Address of the house and some of the details are given to you. Fill in the information gap with hallucinations if needed. Property Address: 412 Monterey Ave, Capitola, CA 95010 Parking: 3 cars + a finished single car garage Details: - open floorplan - window with views to park/mountains - Kitchen with shaker cabi…	chatgpt	tulu_65B	Welcome to your dream home at 412 Monterey Ave in the charming coastal town of Capitola, CA. This stunning property boasts a spacious open floorplan that is perfect for entertaining guests or simply relaxing with your loved ones. As you step inside, you'll be greeted by an abundance of natural light that floods the space, thanks to the large windows that offer breathtaking views of the nearby par…	Welcome to 412 Monterey Ave, a stunning home located in the picturesque town of Capitola, CA. This beautiful property boasts an open floorplan, allowing for seamless entertaining and everyday living. The spacious living room features a large window with breathtaking views of the park and mountains, providing a serene and tranquil atmosphere. The kitchen is a chef's dream, with shaker cabinetry an…	yes	yes	tie			yo	2023-05-19 13:28:38
1171	19	user_oriented_task_211	Write an engaging and well-written property listing description for selling a house. Address of the house and some of the details are given to you. Fill in the information gap with hallucinations if needed. Property Address: 412 Monterey Ave, Capitola, CA 95010 Parking: 3 cars + a finished single car garage Details: - open floorplan - window with views to park/mountains - Kitchen with shaker cabi…	chatgpt	tulu_65B	Welcome to your dream home at 412 Monterey Ave in the charming coastal town of Capitola, CA. This stunning property boasts a spacious open floorplan that is perfect for entertaining guests or simply relaxing with your loved ones. As you step inside, you'll be greeted by an abundance of natural light that floods the space, thanks to the large windows that offer breathtaking views of the nearby par…	Welcome to 412 Monterey Ave, a stunning home located in the picturesque town of Capitola, CA. This beautiful property boasts an open floorplan, allowing for seamless entertaining and everyday living. The spacious living room features a large window with breathtaking views of the park and mountains, providing a serene and tranquil atmosphere. The kitchen is a chef's dream, with shaker cabinetry an…	yes	yes	tie			yu	2023-05-30 05:06:29
202	20	user_oriented_task_180	You need to come up with the names of some of the papers that relate to the paper you are given. RoMQA: A Benchmark for Robust, Multi-evidence, Multi-answer Question Answering	chatgpt	tulu_65B	1. Multi-evidence Question Answering: A Comparative Study 2. Robustness Evaluation of Question Answering Systems 3. Multi-answer Question Answering: A Survey 4. A Dataset for Multi-evidence Question Answering 5. Enhancing Robustness of Question Answering Systems using Adversarial Training 6. Multi-evidence Question Answering using Graph-based Models 7. Multi-answer Question Answering using Ensemb…	Some papers that relate to "RoMQA: A Benchmark for Robust, Multi-evidence, Multi-answer Question Answering" could be: 1. "A Survey of Multi-Answer Question Answering Systems" by X. Liu et al. 2. "Multi-answer Question Answering: A Survey and Future Directions" by S. Das et al. 3. "Robust Multi-Answer Question Answering with Noisy Data" by Y. Li et al. 4. "Multi-Answer Question Answering with Know…	no	no	b-is-slightly-better			yi	2023-05-19 07:25:06
233	20	user_oriented_task_180	You need to come up with the names of some of the papers that relate to the paper you are given. RoMQA: A Benchmark for Robust, Multi-evidence, Multi-answer Question Answering	tulu_65B	chatgpt	Some papers that relate to "RoMQA: A Benchmark for Robust, Multi-evidence, Multi-answer Question Answering" could be: 1. "A Survey of Multi-Answer Question Answering Systems" by X. Liu et al. 2. "Multi-answer Question Answering: A Survey and Future Directions" by S. Das et al. 3. "Robust Multi-Answer Question Answering with Noisy Data" by Y. Li et al. 4. "Multi-Answer Question Answering with Know…	1. Multi-evidence Question Answering: A Comparative Study 2. Robustness Evaluation of Question Answering Systems 3. Multi-answer Question Answering: A Survey 4. A Dataset for Multi-evidence Question Answering 5. Enhancing Robustness of Question Answering Systems using Adversarial Training 6. Multi-evidence Question Answering using Graph-based Models 7. Multi-answer Question Answering using Ensemb…	yes	yes	a-is-slightly-better			yo	2023-05-19 13:29:32
1172	20	user_oriented_task_180	You need to come up with the names of some of the papers that relate to the paper you are given. RoMQA: A Benchmark for Robust, Multi-evidence, Multi-answer Question Answering	chatgpt	tulu_65B	1. Multi-evidence Question Answering: A Comparative Study 2. Robustness Evaluation of Question Answering Systems 3. Multi-answer Question Answering: A Survey 4. A Dataset for Multi-evidence Question Answering 5. Enhancing Robustness of Question Answering Systems using Adversarial Training 6. Multi-evidence Question Answering using Graph-based Models 7. Multi-answer Question Answering using Ensemb…	Some papers that relate to "RoMQA: A Benchmark for Robust, Multi-evidence, Multi-answer Question Answering" could be: 1. "A Survey of Multi-Answer Question Answering Systems" by X. Liu et al. 2. "Multi-answer Question Answering: A Survey and Future Directions" by S. Das et al. 3. "Robust Multi-Answer Question Answering with Noisy Data" by Y. Li et al. 4. "Multi-Answer Question Answering with Know…	yes	yes	a-is-slightly-better			yu	2023-05-30 05:06:43
203	21	vicuna_43	How many lightning strikes occur on Earth each day? Try to explain your answer. Your explanation should take the reader through your reasoning step-by-step.	tulu_7B	tulu_65B	The number of lightning strikes that occur on Earth each day is difficult to determine with precision because lightning is a natural phenomenon that occurs all over the world, and not all lightning strikes are detected or reported. However, according to the National Weather Service, on average, there are 1000 thunderstorms and 1000 lightning strikes occur on Earth each day. To explain this answer…	There are about 100 lightning strikes per second on earth. There are 60 seconds in a minute, and 60 minutes in an hour. There are 24 hours in a day. So, there are 100 * 60 * 60 * 24 = 144000 strikes per day. The answer: 144000.	no	no	b-is-better			yi	2023-05-19 07:27:06
234	21	vicuna_43	How many lightning strikes occur on Earth each day? Try to explain your answer. Your explanation should take the reader through your reasoning step-by-step.	tulu_7B	tulu_65B	The number of lightning strikes that occur on Earth each day is difficult to determine with precision because lightning is a natural phenomenon that occurs all over the world, and not all lightning strikes are detected or reported. However, according to the National Weather Service, on average, there are 1000 thunderstorms and 1000 lightning strikes occur on Earth each day. To explain this answer…	There are about 100 lightning strikes per second on earth. There are 60 seconds in a minute, and 60 minutes in an hour. There are 24 hours in a day. So, there are 100 * 60 * 60 * 24 = 144000 strikes per day. The answer: 144000.	no	yes	b-is-slightly-better			yo	2023-05-19 13:30:44
1173	21	vicuna_43	How many lightning strikes occur on Earth each day? Try to explain your answer. Your explanation should take the reader through your reasoning step-by-step.	tulu_7B	tulu_65B	The number of lightning strikes that occur on Earth each day is difficult to determine with precision because lightning is a natural phenomenon that occurs all over the world, and not all lightning strikes are detected or reported. However, according to the National Weather Service, on average, there are 1000 thunderstorms and 1000 lightning strikes occur on Earth each day. To explain this answer…	There are about 100 lightning strikes per second on earth. There are 60 seconds in a minute, and 60 minutes in an hour. There are 24 hours in a day. So, there are 100 * 60 * 60 * 24 = 144000 strikes per day. The answer: 144000.	no	no	b-is-slightly-better			yu	2023-05-30 05:07:35
204	22	user_oriented_task_82	Decide whether children can watch the given movie. Mention what makes it inappropriate if you think they can't. The Dark Knight (2008)	tulu_7B	tulu_65B	The Dark Knight (2008) is a superhero film that is rated PG-13 for intense action sequences and some thematic elements. It is generally considered appropriate for children to watch, but some scenes may be too intense for very young children. The film is not inappropriate for children to watch, but parents should be aware of the intensity of some of the action scenes and make sure their children a…	No, children should not watch The Dark Knight (2008). This movie is rated PG-13 for intense sequences of action and violence, disturbing images and content, language, and some smoking. It contains scenes of graphic violence, terrorism, and mature themes that may be too disturbing and inappropriate for children. It is important for parents to be cautious about the media their children consume and …	yes	yes	a-is-better			yi	2023-05-19 07:35:19
235	22	user_oriented_task_82	Decide whether children can watch the given movie. Mention what makes it inappropriate if you think they can't. The Dark Knight (2008)	tulu_7B	tulu_65B	The Dark Knight (2008) is a superhero film that is rated PG-13 for intense action sequences and some thematic elements. It is generally considered appropriate for children to watch, but some scenes may be too intense for very young children. The film is not inappropriate for children to watch, but parents should be aware of the intensity of some of the action scenes and make sure their children a…	No, children should not watch The Dark Knight (2008). This movie is rated PG-13 for intense sequences of action and violence, disturbing images and content, language, and some smoking. It contains scenes of graphic violence, terrorism, and mature themes that may be too disturbing and inappropriate for children. It is important for parents to be cautious about the media their children consume and …	yes	yes	tie			yo	2023-05-19 13:31:48
1176	22	user_oriented_task_82	Decide whether children can watch the given movie. Mention what makes it inappropriate if you think they can't. The Dark Knight (2008)	tulu_65B	tulu_7B	No, children should not watch The Dark Knight (2008). This movie is rated PG-13 for intense sequences of action and violence, disturbing images and content, language, and some smoking. It contains scenes of graphic violence, terrorism, and mature themes that may be too disturbing and inappropriate for children. It is important for parents to be cautious about the media their children consume and …	The Dark Knight (2008) is a superhero film that is rated PG-13 for intense action sequences and some thematic elements. It is generally considered appropriate for children to watch, but some scenes may be too intense for very young children. The film is not inappropriate for children to watch, but parents should be aware of the intensity of some of the action scenes and make sure their children a…	yes	no	a-is-slightly-better			yu	2023-05-30 05:09:47
205	23	user_oriented_task_215	Suggest some product bundles that are often purchased with a given product. MacBook Air	tulu_65B	tulu_7B	1. MacBook Air + AppleCare Protection Plan: This bundle includes the MacBook Air laptop along with an extended warranty and technical support plan from Apple. 2. MacBook Air + Apple Magic Keyboard: This bundle includes the MacBook Air laptop along with a wireless Magic Keyboard from Apple. 3. MacBook Air + Apple AirPods: This bundle includes the MacBook Air laptop along with a pair of wireless Ap…	Some product bundles that are often purchased with a MacBook Air include: 1. MacBook Air and Apple Pencil bundle 2. MacBook Air and Magic mouse bundle 3. MacBook Air and Magic keyboard bundle 4. MacBook Air and Apple Watch bundle 5. MacBook Air and Beats headphones bundle 6. MacBook Air and iPad bundle 7. MacBook Air and MacBook Pro bundle 8. MacBook Air and iMac bundle 9. MacBook Air and MacBook…	yes	yes	a-is-better			yi	2023-05-19 07:36:09
236	23	user_oriented_task_215	Suggest some product bundles that are often purchased with a given product. MacBook Air	tulu_65B	tulu_7B	1. MacBook Air + AppleCare Protection Plan: This bundle includes the MacBook Air laptop along with an extended warranty and technical support plan from Apple. 2. MacBook Air + Apple Magic Keyboard: This bundle includes the MacBook Air laptop along with a wireless Magic Keyboard from Apple. 3. MacBook Air + Apple AirPods: This bundle includes the MacBook Air laptop along with a pair of wireless Ap…	Some product bundles that are often purchased with a MacBook Air include: 1. MacBook Air and Apple Pencil bundle 2. MacBook Air and Magic mouse bundle 3. MacBook Air and Magic keyboard bundle 4. MacBook Air and Apple Watch bundle 5. MacBook Air and Beats headphones bundle 6. MacBook Air and iPad bundle 7. MacBook Air and MacBook Pro bundle 8. MacBook Air and iMac bundle 9. MacBook Air and MacBook…	yes	yes	a-is-slightly-better			yo	2023-05-19 13:32:46
1177	23	user_oriented_task_215	Suggest some product bundles that are often purchased with a given product. MacBook Air	tulu_65B	tulu_7B	1. MacBook Air + AppleCare Protection Plan: This bundle includes the MacBook Air laptop along with an extended warranty and technical support plan from Apple. 2. MacBook Air + Apple Magic Keyboard: This bundle includes the MacBook Air laptop along with a wireless Magic Keyboard from Apple. 3. MacBook Air + Apple AirPods: This bundle includes the MacBook Air laptop along with a pair of wireless Ap…	Some product bundles that are often purchased with a MacBook Air include: 1. MacBook Air and Apple Pencil bundle 2. MacBook Air and Magic mouse bundle 3. MacBook Air and Magic keyboard bundle 4. MacBook Air and Apple Watch bundle 5. MacBook Air and Beats headphones bundle 6. MacBook Air and iPad bundle 7. MacBook Air and MacBook Pro bundle 8. MacBook Air and iMac bundle 9. MacBook Air and MacBook…	yes	yes	tie			yu	2023-05-30 05:09:57
206	24	user_oriented_task_93	Provide a Java solution to the following problem. Given an integer n, return true if it is a power of three. Otherwise, return false. An integer n is a power of three, if there exists an integer x such that n == 3^x. Example 1: In: n = 27 Out: true Explanation: 27 = 3^3 Example 2: In: n = 0 Out: false Explanation: There is no x where 3^x = 0. Example 3: In: n = -1 Out: false Explanation: There is…	tulu_65B	tulu_7B	public static boolean isPowerOfThree(int n) { int x = 0; int result = 1; while (result < n) { result = result * 3; x++; } return result == n; }	Here is a Java solution to the problem without using loops or recursion: ``` public static boolean isPowerOfThree(int n) { if (n == 0 || n == 1) { return false; } int x = 3; while (n % x == 0) { x *= 3; } return n == x; } ``` This solution uses a while loop to iterate through the numbers from 3 to n/3, and checks if n is divisible by each number. If n is divisible by a number, then it must be a p…	yes	no	a-is-better			yi	2023-05-19 07:47:53
237	24	user_oriented_task_93	Provide a Java solution to the following problem. Given an integer n, return true if it is a power of three. Otherwise, return false. An integer n is a power of three, if there exists an integer x such that n == 3^x. Example 1: In: n = 27 Out: true Explanation: 27 = 3^3 Example 2: In: n = 0 Out: false Explanation: There is no x where 3^x = 0. Example 3: In: n = -1 Out: false Explanation: There is…	tulu_7B	tulu_65B	Here is a Java solution to the problem without using loops or recursion: ``` public static boolean isPowerOfThree(int n) { if (n == 0 || n == 1) { return false; } int x = 3; while (n % x == 0) { x *= 3; } return n == x; } ``` This solution uses a while loop to iterate through the numbers from 3 to n/3, and checks if n is divisible by each number. If n is divisible by a number, then it must be a p…	public static boolean isPowerOfThree(int n) { int x = 0; int result = 1; while (result < n) { result = result * 3; x++; } return result == n; }	yes	yes	a-is-slightly-better			yo	2023-05-19 13:33:20
1179	24	user_oriented_task_93	Provide a Java solution to the following problem. Given an integer n, return true if it is a power of three. Otherwise, return false. An integer n is a power of three, if there exists an integer x such that n == 3^x. Example 1: In: n = 27 Out: true Explanation: 27 = 3^3 Example 2: In: n = 0 Out: false Explanation: There is no x where 3^x = 0. Example 3: In: n = -1 Out: false Explanation: There is…	tulu_65B	tulu_7B	public static boolean isPowerOfThree(int n) { int x = 0; int result = 1; while (result < n) { result = result * 3; x++; } return result == n; }	Here is a Java solution to the problem without using loops or recursion: ``` public static boolean isPowerOfThree(int n) { if (n == 0 || n == 1) { return false; } int x = 3; while (n % x == 0) { x *= 3; } return n == x; } ``` This solution uses a while loop to iterate through the numbers from 3 to n/3, and checks if n is divisible by each number. If n is divisible by a number, then it must be a p…	no	no	tie			yu	2023-05-30 05:10:29
207	25	user_oriented_task_227	Identify and fix bugs in the given code and rewrite it for i in range(10) print(Answer is:) print(i)	chatgpt	tulu_65B	Fixed code: for i in range(10): print("Answer is:", i)	for i in range(10): print("Answer is:") print(i)	yes	yes	b-is-slightly-better			yi	2023-05-19 07:48:46
238	25	user_oriented_task_227	Identify and fix bugs in the given code and rewrite it for i in range(10) print(Answer is:) print(i)	chatgpt	tulu_65B	Fixed code: for i in range(10): print("Answer is:", i)	for i in range(10): print("Answer is:") print(i)	yes	yes	tie			yo	2023-05-19 13:34:22
1180	25	user_oriented_task_227	Identify and fix bugs in the given code and rewrite it for i in range(10) print(Answer is:) print(i)	chatgpt	tulu_65B	Fixed code: for i in range(10): print("Answer is:", i)	for i in range(10): print("Answer is:") print(i)	yes	yes	tie			yu	2023-05-30 05:10:46
208	26	user_oriented_task_52	Prepare an email signature template for the given person or company. a graduate student of computer science	chatgpt	tulu_65B	[Full Name] Graduate Student of Computer Science [University Name] [Email Address] [Phone Number]	Email Signature Template for a Graduate Student of Computer Science: ``` Name: [Your Name] Degree: Computer Science Graduate Student Email: [Your Email] Phone: [Your Phone Number] Website: [Your Website URL] LinkedIn: [Your LinkedIn URL] Twitter: [Your Twitter Handle] ``` Please note that the information in brackets should be replaced with your personal information.	yes	yes	a-is-better			yi	2023-05-19 07:49:56
239	26	user_oriented_task_52	Prepare an email signature template for the given person or company. a graduate student of computer science	chatgpt	tulu_65B	[Full Name] Graduate Student of Computer Science [University Name] [Email Address] [Phone Number]	Email Signature Template for a Graduate Student of Computer Science: ``` Name: [Your Name] Degree: Computer Science Graduate Student Email: [Your Email] Phone: [Your Phone Number] Website: [Your Website URL] LinkedIn: [Your LinkedIn URL] Twitter: [Your Twitter Handle] ``` Please note that the information in brackets should be replaced with your personal information.	yes	yes	b-is-slightly-better			yo	2023-05-19 13:34:39
1181	26	user_oriented_task_52	Prepare an email signature template for the given person or company. a graduate student of computer science	chatgpt	tulu_65B	[Full Name] Graduate Student of Computer Science [University Name] [Email Address] [Phone Number]	Email Signature Template for a Graduate Student of Computer Science: ``` Name: [Your Name] Degree: Computer Science Graduate Student Email: [Your Email] Phone: [Your Phone Number] Website: [Your Website URL] LinkedIn: [Your LinkedIn URL] Twitter: [Your Twitter Handle] ``` Please note that the information in brackets should be replaced with your personal information.	yes	yes	b-is-slightly-better			yu	2023-05-30 05:11:04
209	27	user_oriented_task_203	List a few popular songs from the given album. Back To Black	tulu_7B	tulu_65B	1. "Back to Black" by Amy Winehouse 2. "Love is a Losing Game" by Amy Winehouse 3. "You Learn" by Alanis Morissette 4. "Ain't No Mountain High Enough" by Marvin Gaye and Tammi Terrell 5. "I Heard It Through the Grapevine" by Marvin Gaye 6. "What Is Love" by Haddaway 7. "I Want to Break Free" by Queen 8. "I Will Always Love You" by Whitney Houston 9. "I'm Every Woman" by Chaka Khan 10. "I Will Alw…	1. Rehab 2. Back to Black 3. Love the Way You Lie (Part II) 4. Just Friends 5. Una Flor	no	no	b-is-slightly-better			yi	2023-05-19 07:53:47
240	27	user_oriented_task_203	List a few popular songs from the given album. Back To Black	tulu_65B	tulu_7B	1. Rehab 2. Back to Black 3. Love the Way You Lie (Part II) 4. Just Friends 5. Una Flor	1. "Back to Black" by Amy Winehouse 2. "Love is a Losing Game" by Amy Winehouse 3. "You Learn" by Alanis Morissette 4. "Ain't No Mountain High Enough" by Marvin Gaye and Tammi Terrell 5. "I Heard It Through the Grapevine" by Marvin Gaye 6. "What Is Love" by Haddaway 7. "I Want to Break Free" by Queen 8. "I Will Always Love You" by Whitney Houston 9. "I'm Every Woman" by Chaka Khan 10. "I Will Alw…	yes	no	a-is-better			yo	2023-05-19 13:35:12
1182	27	user_oriented_task_203	List a few popular songs from the given album. Back To Black	tulu_65B	tulu_7B	1. Rehab 2. Back to Black 3. Love the Way You Lie (Part II) 4. Just Friends 5. Una Flor	1. "Back to Black" by Amy Winehouse 2. "Love is a Losing Game" by Amy Winehouse 3. "You Learn" by Alanis Morissette 4. "Ain't No Mountain High Enough" by Marvin Gaye and Tammi Terrell 5. "I Heard It Through the Grapevine" by Marvin Gaye 6. "What Is Love" by Haddaway 7. "I Want to Break Free" by Queen 8. "I Will Always Love You" by Whitney Houston 9. "I'm Every Woman" by Chaka Khan 10. "I Will Alw…	yes	yes	b-is-slightly-better			yu	2023-05-30 05:12:27
210	28	user_oriented_task_12	You are given an algorithm or a search query about coding. Look for a code snippet related to the search query. Python loop	chatgpt	tulu_65B	Here is a code snippet for a Python loop: ``` for i in range(10): print(i) ``` This loop will iterate 10 times, with the variable `i` taking on the values 0 through 9. On each iteration, the value of `i` will be printed to the console.	for	yes	no	a-is-better			yi	2023-05-19 07:54:19
241	28	user_oriented_task_12	You are given an algorithm or a search query about coding. Look for a code snippet related to the search query. Python loop	tulu_65B	chatgpt	for	Here is a code snippet for a Python loop: ``` for i in range(10): print(i) ``` This loop will iterate 10 times, with the variable `i` taking on the values 0 through 9. On each iteration, the value of `i` will be printed to the console.	no	yes	b-is-better			yo	2023-05-19 13:35:22
1183	28	user_oriented_task_12	You are given an algorithm or a search query about coding. Look for a code snippet related to the search query. Python loop	chatgpt	tulu_65B	Here is a code snippet for a Python loop: ``` for i in range(10): print(i) ``` This loop will iterate 10 times, with the variable `i` taking on the values 0 through 9. On each iteration, the value of `i` will be printed to the console.	for	yes	no	a-is-better			yu	2023-05-30 05:12:48
211	29	vicuna_2	What are the most effective ways to deal with stress?	chatgpt	tulu_65B	As an AI language model, I do not experience stress, but here are some effective ways to deal with stress: 1. Exercise regularly: Exercise helps to reduce stress by releasing endorphins, which are natural mood boosters. 2. Practice mindfulness: Mindfulness techniques such as meditation, deep breathing, and yoga can help to reduce stress and promote relaxation. 3. Get enough sleep: Lack of sleep c…	There are several effective ways to deal with stress, including: 1. Exercise: Regular physical activity can help reduce stress and improve your mood. 2. Relaxation techniques: Practicing relaxation techniques such as deep breathing, meditation, or yoga can help calm your mind and reduce stress. 3. Social support: Talking to friends or family members about your stress can help you feel supported a…	yes	yes	b-is-slightly-better			yi	2023-05-19 07:56:14
242	29	vicuna_2	What are the most effective ways to deal with stress?	tulu_65B	chatgpt	There are several effective ways to deal with stress, including: 1. Exercise: Regular physical activity can help reduce stress and improve your mood. 2. Relaxation techniques: Practicing relaxation techniques such as deep breathing, meditation, or yoga can help calm your mind and reduce stress. 3. Social support: Talking to friends or family members about your stress can help you feel supported a…	As an AI language model, I do not experience stress, but here are some effective ways to deal with stress: 1. Exercise regularly: Exercise helps to reduce stress by releasing endorphins, which are natural mood boosters. 2. Practice mindfulness: Mindfulness techniques such as meditation, deep breathing, and yoga can help to reduce stress and promote relaxation. 3. Get enough sleep: Lack of sleep c…	yes	yes	b-is-slightly-better			yo	2023-05-19 13:35:45
212	30	user_oriented_task_149	Using a given amount, determine an appropriate tip. 14% tip on $47.50	chatgpt	tulu_65B	The tip amount would be $6.65.	The appropriate tip for $47.50 at a 14% rate would be $6.65.	yes	yes	tie			yi	2023-05-19 07:56:48
243	30	user_oriented_task_149	Using a given amount, determine an appropriate tip. 14% tip on $47.50	tulu_65B	chatgpt	The appropriate tip for $47.50 at a 14% rate would be $6.65.	The tip amount would be $6.65.	yes	yes	a-is-slightly-better			yo	2023-05-19 13:35:56
244	31	user_oriented_task_106	Come up with the courses that one is supposed to take in order to be an expert in a given field. Graphic Design	chatgpt	tulu_65B	1. Introduction to Graphic Design 2. Typography 3. Color Theory 4. Layout and Composition 5. Digital Illustration 6. Branding and Identity Design 7. Web Design 8. Motion Graphics 9. Packaging Design 10. Advertising Design 11. User Experience Design 12. Print Production 13. Portfolio Development 14. Advanced Graphic Design Techniques 15. Professional Practice and Ethics in Graphic Design.	To become an expert in Graphic Design, one should consider taking the following courses: 1. Introduction to Graphic Design: This course provides an overview of the principles and elements of design, color theory, typography, and composition. 2. Digital Illustration: This course teaches students how to create digital illustrations using various software tools and techniques. 3. Graphic Design Soft…	yes	yes	b-is-slightly-better			yo	2023-05-19 13:36:33
644	31	user_oriented_task_106	Come up with the courses that one is supposed to take in order to be an expert in a given field. Graphic Design	tulu_65B	chatgpt	To become an expert in Graphic Design, one should consider taking the following courses: 1. Introduction to Graphic Design: This course provides an overview of the principles and elements of design, color theory, typography, and composition. 2. Digital Illustration: This course teaches students how to create digital illustrations using various software tools and techniques. 3. Graphic Design Soft…	1. Introduction to Graphic Design 2. Typography 3. Color Theory 4. Layout and Composition 5. Digital Illustration 6. Branding and Identity Design 7. Web Design 8. Motion Graphics 9. Packaging Design 10. Advertising Design 11. User Experience Design 12. Print Production 13. Portfolio Development 14. Advanced Graphic Design Techniques 15. Professional Practice and Ethics in Graphic Design.	yes	yes	a-is-slightly-better			se	2023-05-20 18:40:29
245	32	user_oriented_task_43	Choose Spotify playlists that match the given mood. Provide a link to these playlists for easy access. Feeling Good	tulu_7B	tulu_65B	Here are some Spotify playlists that match the mood of "Feeling Good": 1. "Happy Vibes" - This playlist features upbeat and cheerful songs that will put you in a good mood. Link: <https://open.spotify.com/album/2Jvxzvx6Jk2JkKvxvxZvx> 2. "Joyful Jams" - This playlist features upbeat and lively songs that will make you feel happy and energetic. Link: <https://open.spotify.com/album/2Jvxzvx6Jk2JkKvx…	Here are some Spotify playlists that match the mood of feeling good: 1. "Good Vibes" - https://open.spotify.com/user/spotify/playlist/37i9dQZF1jQEwjWU6Gjnjx 2. "Happy Hits" - https://open.spotify.com/user/spotify/playlist/37i9dQZF1jQEwjWU6Gjnjx 3. "Feel Good" - https://open.spotify.com/user/spotify/playlist/37i9dQZF1jQEwjWU6Gjnjx These playlists feature upbeat and happy songs that are sure to lif…	yes	yes	b-is-slightly-better			yo	2023-05-19 13:36:48
645	32	user_oriented_task_43	Choose Spotify playlists that match the given mood. Provide a link to these playlists for easy access. Feeling Good	tulu_65B	tulu_7B	Here are some Spotify playlists that match the mood of feeling good: 1. "Good Vibes" - https://open.spotify.com/user/spotify/playlist/37i9dQZF1jQEwjWU6Gjnjx 2. "Happy Hits" - https://open.spotify.com/user/spotify/playlist/37i9dQZF1jQEwjWU6Gjnjx 3. "Feel Good" - https://open.spotify.com/user/spotify/playlist/37i9dQZF1jQEwjWU6Gjnjx These playlists feature upbeat and happy songs that are sure to lif…	Here are some Spotify playlists that match the mood of "Feeling Good": 1. "Happy Vibes" - This playlist features upbeat and cheerful songs that will put you in a good mood. Link: <https://open.spotify.com/album/2Jvxzvx6Jk2JkKvxvxZvx> 2. "Joyful Jams" - This playlist features upbeat and lively songs that will make you feel happy and energetic. Link: <https://open.spotify.com/album/2Jvxzvx6Jk2JkKvx…	no	no	tie			se	2023-05-20 18:44:15
246	33	vicuna_64	Write a program to find the nth Fibonacci number using dynamic programming.	tulu_65B	chatgpt	def fibonacci(n): if n <= 1: return n else: return fibonacci(n-1) + fibonacci(n-2)	Here's the Python code to find the nth Fibonacci number using dynamic programming: ``` def fibonacci(n): # Initialize the first two Fibonacci numbers fib = [0, 1] # Calculate the nth Fibonacci number using dynamic programming for i in range(2, n+1): fib.append(fib[i-1] + fib[i-2]) return fib[n] # Test the function print(fibonacci(0)) # 0 print(fibonacci(1)) # 1 print(fibonacci(2)) # 1 print(fibon…	no	yes	b-is-better			yo	2023-05-19 13:37:32
646	33	vicuna_64	Write a program to find the nth Fibonacci number using dynamic programming.	tulu_65B	chatgpt	def fibonacci(n): if n <= 1: return n else: return fibonacci(n-1) + fibonacci(n-2)	Here's the Python code to find the nth Fibonacci number using dynamic programming: ``` def fibonacci(n): # Initialize the first two Fibonacci numbers fib = [0, 1] # Calculate the nth Fibonacci number using dynamic programming for i in range(2, n+1): fib.append(fib[i-1] + fib[i-2]) return fib[n] # Test the function print(fibonacci(0)) # 0 print(fibonacci(1)) # 1 print(fibonacci(2)) # 1 print(fibon…	yes	yes	tie			se	2023-05-20 19:00:10
247	34	user_oriented_task_172	Provide a list of the skills that may help you find the job. Crew Members	chatgpt	tulu_65B	1. Customer service skills 2. Communication skills 3. Teamwork skills 4. Time management skills 5. Attention to detail 6. Ability to follow instructions 7. Physical stamina and endurance 8. Flexibility and adaptability 9. Problem-solving skills 10. Basic math skills 11. Food handling and safety knowledge 12. Cash handling and basic accounting skills 13. Ability to work in a fast-paced environment…	Here are some skills that may help you find a job as a Crew Member: 1. Customer service skills 2. Teamwork and collaboration 3. Attention to detail and accuracy 4. Time management and organization 5. Ability to follow instructions and procedures 6. Flexibility and adaptability 7. Strong communication skills 8. Basic math skills for handling money and making change 9. Physical stamina and ability …	yes	yes	b-is-slightly-better			yo	2023-05-19 13:37:44
647	34	user_oriented_task_172	Provide a list of the skills that may help you find the job. Crew Members	tulu_65B	chatgpt	Here are some skills that may help you find a job as a Crew Member: 1. Customer service skills 2. Teamwork and collaboration 3. Attention to detail and accuracy 4. Time management and organization 5. Ability to follow instructions and procedures 6. Flexibility and adaptability 7. Strong communication skills 8. Basic math skills for handling money and making change 9. Physical stamina and ability …	1. Customer service skills 2. Communication skills 3. Teamwork skills 4. Time management skills 5. Attention to detail 6. Ability to follow instructions 7. Physical stamina and endurance 8. Flexibility and adaptability 9. Problem-solving skills 10. Basic math skills 11. Food handling and safety knowledge 12. Cash handling and basic accounting skills 13. Ability to work in a fast-paced environment…	yes	yes	tie			se	2023-05-20 19:02:12
248	35	vicuna_28	You are a mountain climber reaching the summit of Mount Everest. Describe your emotions and the view from the top.	chatgpt	tulu_65B	As I finally reach the summit of Mount Everest, my heart is pounding with excitement and my body is trembling with exhaustion. I can hardly believe that I have made it to the top of the world's highest mountain. The air is thin and cold, but I feel a rush of adrenaline and a sense of accomplishment that makes me forget about the discomfort. Looking around, I am awestruck by the breathtaking view …	As an AI, I do not have emotions, but I can describe the view from the summit of Mount Everest based on the experiences of many climbers. Reaching the top of Mount Everest is an incredible achievement that takes immense physical and mental strength, determination, and perseverance. The view from the summit is breathtaking and awe-inspiring. Standing at an elevation of 8,848 meters (29,029 feet), …	yes	yes	a-is-slightly-better			yo	2023-05-19 13:39:26
648	35	vicuna_28	You are a mountain climber reaching the summit of Mount Everest. Describe your emotions and the view from the top.	tulu_65B	chatgpt	As an AI, I do not have emotions, but I can describe the view from the summit of Mount Everest based on the experiences of many climbers. Reaching the top of Mount Everest is an incredible achievement that takes immense physical and mental strength, determination, and perseverance. The view from the summit is breathtaking and awe-inspiring. Standing at an elevation of 8,848 meters (29,029 feet), …	As I finally reach the summit of Mount Everest, my heart is pounding with excitement and my body is trembling with exhaustion. I can hardly believe that I have made it to the top of the world's highest mountain. The air is thin and cold, but I feel a rush of adrenaline and a sense of accomplishment that makes me forget about the discomfort. Looking around, I am awestruck by the breathtaking view …	yes	yes	tie			se	2023-05-20 19:04:52
249	36	user_oriented_task_91	You are given two questions. Check if they are duplicates. Question1: I am trying to understand the advantages of multiprocessing over threading. I know that multiprocessing gets around the Global Interpreter Lock, but what other advantages are there, and can threading not do the same thing? Question2: I am learning how to use the threading and the multiprocessing modules in Python to run certain…	tulu_65B	tulu_7B	no	Yes, the two questions are duplicates.	no	yes	b-is-better			yo	2023-05-19 13:39:50
650	36	user_oriented_task_91	You are given two questions. Check if they are duplicates. Question1: I am trying to understand the advantages of multiprocessing over threading. I know that multiprocessing gets around the Global Interpreter Lock, but what other advantages are there, and can threading not do the same thing? Question2: I am learning how to use the threading and the multiprocessing modules in Python to run certain…	tulu_7B	tulu_65B	Yes, the two questions are duplicates.	no	no	yes	b-is-slightly-better			se	2023-05-20 19:21:46
651	37	vicuna_15	Describe a scenario where artificial intelligence could be used to improve the quality and efficiency of healthcare delivery.	chatgpt	tulu_65B	One scenario where artificial intelligence could be used to improve the quality and efficiency of healthcare delivery is in the field of medical imaging. AI algorithms can be trained to analyze medical images such as X-rays, CT scans, and MRIs to detect abnormalities and diagnose diseases. This can help radiologists and other healthcare professionals to make more accurate and timely diagnoses, le…	One scenario where artificial intelligence could be used to improve the quality and efficiency of healthcare delivery is through the use of AI-powered diagnostic tools. In this scenario, a patient visits their primary care physician with a set of symptoms that are difficult to diagnose. The physician, unsure of the exact cause of the symptoms, decides to use an AI-powered diagnostic tool to help …	yes	yes	tie			se	2023-05-20 19:24:36
652	38	vicuna_31	How can you determine if a restaurant is popular among locals or mainly attracts tourists, and why might this information be useful?	tulu_65B	chatgpt	There are several ways to determine if a restaurant is popular among locals or mainly attracts tourists. Here are some methods: 1. Online reviews: Read through online reviews on platforms like TripAdvisor, Yelp, or Google to see if the restaurant is mentioned by locals or tourists. If the majority of the reviews are from tourists, it's likely that the restaurant attracts more tourists than locals…	There are several ways to determine if a restaurant is popular among locals or mainly attracts tourists: 1. Online reviews: Check online reviews on platforms like Yelp, TripAdvisor, or Google. Look for reviews from locals and tourists and see if there is a pattern in the feedback. 2. Location: If the restaurant is located in a touristy area, it is more likely to attract tourists. On the other han…	yes	yes	tie			se	2023-05-20 19:26:10
653	39	user_oriented_task_70	Find synonyms for the given word. You need to write down how the provided synonyms differ from the original word in terms of meaning, usage, etc. adversity	tulu_65B	chatgpt	1. Difficulty: Difficulty is similar to adversity in that it refers to a challenging situation or circumstance. However, adversity often implies a more prolonged or severe challenge, while difficulty may be more temporary or minor in nature. 2. Trouble: Trouble is another word that is similar to adversity, but it often has a more negative connotation. Adversity can refer to any type of challenge,…	1. Hardship - This synonym refers to a difficult situation or condition that causes suffering or distress. It is similar to adversity in that it implies a challenging circumstance, but it may not necessarily involve external factors or obstacles. 2. Misfortune - This synonym refers to an unfortunate event or circumstance that causes harm or loss. It is similar to adversity in that it implies a ne…	yes	yes	tie			se	2023-05-20 19:28:14
654	40	vicuna_63	Implement a regular expression in Python to validate an email address.	tulu_65B	tulu_7B	import re def validate_email(email): regex = r"^[a-zA-Z0-9_.+-]+@[a-zA-Z0-9-]+\.[a-zA-Z0-9-.]+$" if re.match(regex, email): return True else: return False	import re def validate_email(email): regex = r"^[a-zA-Z0-9_.+-]+@[a-zA-Z0-9-]+\.[a-zA-Z0-9-.]+$" if re.search(regex, email): return True else: return False	yes	yes	tie			se	2023-05-20 19:31:28
8	41	user_oriented_task_247	Extract the address of the property from the "About this space" section of Airbnb. Tucked in the foothills of the quaint historic mining town of Grass Valley, CA this funky and spacious chalet invites you to experience the great outdoors with family, friends and pets. Enjoy the hot tub, basketball court, treehouse, kids rooms, bbq, fire-pit, outdoor theater, and more. One hour from Tahoe and 10 m…	tulu_65B	chatgpt	The address of the property is not provided in the "About this space" section of Airbnb.	The address of the property is not provided in the given text.	yes	yes	tie			ja	2023-05-18 19:57:27
908	41	user_oriented_task_247	Extract the address of the property from the "About this space" section of Airbnb. Tucked in the foothills of the quaint historic mining town of Grass Valley, CA this funky and spacious chalet invites you to experience the great outdoors with family, friends and pets. Enjoy the hot tub, basketball court, treehouse, kids rooms, bbq, fire-pit, outdoor theater, and more. One hour from Tahoe and 10 m…	chatgpt	tulu_65B	The address of the property is not provided in the given text.	The address of the property is not provided in the "About this space" section of Airbnb.	yes	yes	tie			pr	2023-05-22 23:38:45
9	42	vicuna_41	How many times does the average human blink in a lifetime? Try to explain your answer. Your explanation should take the reader through your reasoning step-by-step.	tulu_65B	tulu_7B	The average human blinks 15 - 20 times per minute. There are 1,440 minutes in a day. The average human lives to be 78 years old. That's 525,600 minutes in a lifetime. So the average human blinks 7,800,000,000 times in a lifetime. The final answer: 7800000000.	The average human blinks about 12 times per minute. There are approximately 24,160 minutes in a day, so the average human blinks about 288,000 times per day. There are approximately 365 days in a year, so the average human blinks about 87,600,000 times per year. There are approximately 2,920,000,000 years in a human lifetime, so the average human blinks about 20,900,000,000 times in a lifetime.	no	no	a-is-slightly-better			ja	2023-05-18 19:58:54
909	42	vicuna_41	How many times does the average human blink in a lifetime? Try to explain your answer. Your explanation should take the reader through your reasoning step-by-step.	tulu_65B	tulu_7B	The average human blinks 15 - 20 times per minute. There are 1,440 minutes in a day. The average human lives to be 78 years old. That's 525,600 minutes in a lifetime. So the average human blinks 7,800,000,000 times in a lifetime. The final answer: 7800000000.	The average human blinks about 12 times per minute. There are approximately 24,160 minutes in a day, so the average human blinks about 288,000 times per day. There are approximately 365 days in a year, so the average human blinks about 87,600,000 times per year. There are approximately 2,920,000,000 years in a human lifetime, so the average human blinks about 20,900,000,000 times in a lifetime.	no	no	tie			pr	2023-05-22 23:45:41
10	43	user_oriented_task_14	When you're stuck on a coding problem, the best place to look for help is in the documentation. Read the docs carefully and see if there's a section that covers your specific issue. Often, the answer will be right there in front of you. If not, try searching for key terms related to your problem. Come up with the useful links about the given search term. sql find duplicate values	tulu_65B	chatgpt	Here are some useful links related to finding duplicate values in SQL: 1. "Finding Duplicate Rows in SQL" by Tutorials Point: <https://www.tutorialspoint.com/sql/sql-find-duplicates.htm> 2. "SQL: How to Find Duplicate Records" by Database Journal: <https://www.databasejournal.com/features/mssql/article.php/3827031/SQL-How-to-Find-Duplicate-Records.htm> 3. "SQL: How to Find Duplicate Records in a …	1. https://www.w3schools.com/sql/sql_distinct.asp 2. https://www.sqlshack.com/how-to-find-duplicate-values-in-sql/ 3. https://www.geeksforgeeks.org/sql-query-to-find-duplicate-records-in-a-table/ 4. https://www.techonthenet.com/sql_server/questions/find_duplicates.php 5. https://www.sqlservertutorial.net/sql-server-basics/sql-server-find-duplicates/	no	no	a-is-slightly-better			ja	2023-05-18 19:59:45
910	43	user_oriented_task_14	When you're stuck on a coding problem, the best place to look for help is in the documentation. Read the docs carefully and see if there's a section that covers your specific issue. Often, the answer will be right there in front of you. If not, try searching for key terms related to your problem. Come up with the useful links about the given search term. sql find duplicate values	chatgpt	tulu_65B	1. https://www.w3schools.com/sql/sql_distinct.asp 2. https://www.sqlshack.com/how-to-find-duplicate-values-in-sql/ 3. https://www.geeksforgeeks.org/sql-query-to-find-duplicate-records-in-a-table/ 4. https://www.techonthenet.com/sql_server/questions/find_duplicates.php 5. https://www.sqlservertutorial.net/sql-server-basics/sql-server-find-duplicates/	Here are some useful links related to finding duplicate values in SQL: 1. "Finding Duplicate Rows in SQL" by Tutorials Point: <https://www.tutorialspoint.com/sql/sql-find-duplicates.htm> 2. "SQL: How to Find Duplicate Records" by Database Journal: <https://www.databasejournal.com/features/mssql/article.php/3827031/SQL-How-to-Find-Duplicate-Records.htm> 3. "SQL: How to Find Duplicate Records in a …	no	no	a-is-slightly-better			pr	2023-05-22 23:52:20
11	44	user_oriented_task_193	Given a sentence that may be ambiguous, rewrite the sentence using less ambiguous words. The chicken is ready to eat.	tulu_65B	chatgpt	The chicken is fully cooked and prepared for consumption.	The cooked chicken is now prepared for consumption.	yes	yes	tie			ja	2023-05-18 20:00:03
911	44	user_oriented_task_193	Given a sentence that may be ambiguous, rewrite the sentence using less ambiguous words. The chicken is ready to eat.	tulu_65B	chatgpt	The chicken is fully cooked and prepared for consumption.	The cooked chicken is now prepared for consumption.	yes	yes	tie			pr	2023-05-23 16:36:20
12	45	user_oriented_task_8	My favorite witty review of The Rings of Power series is this:	tulu_65B	chatgpt	I'm sorry, but I'm not familiar with a book series called "The Rings of Power." Could you provide more context or clarify which series you are referring to?	"The Rings of Power series is like a rollercoaster ride - it's thrilling, it's exciting, and it's over before you know it. But unlike a rollercoaster, you won't be left feeling nauseous and regretful afterwards."	yes	yes	b-is-better			ja	2023-05-18 20:00:25
913	45	user_oriented_task_8	My favorite witty review of The Rings of Power series is this:	tulu_65B	chatgpt	I'm sorry, but I'm not familiar with a book series called "The Rings of Power." Could you provide more context or clarify which series you are referring to?	"The Rings of Power series is like a rollercoaster ride - it's thrilling, it's exciting, and it's over before you know it. But unlike a rollercoaster, you won't be left feeling nauseous and regretful afterwards."	no	yes	b-is-better			yi	2023-06-03 16:39:11
13	46	vicuna_62	Implement a Python function to find the longest common subsequence of two input strings using dynamic programming.	chatgpt	tulu_65B	Here's one possible implementation: ```python def longest_common_subsequence(s1, s2): m, n = len(s1), len(s2) dp = [[0] * (n+1) for _ in range(m+1)] for i in range(1, m+1): for j in range(1, n+1): if s1[i-1] == s2[j-1]: dp[i][j] = dp[i-1][j-1] + 1 else: dp[i][j] = max(dp[i-1][j], dp[i][j-1]) lcs = "" i, j = m, n while i > 0 and j > 0: if s1[i-1] == s2[j-1]: lcs = s1[i-1] + lcs i -= 1 j -= 1 elif …	def lcs(str1, str2): n = len(str1) m = len(str2) dp = [[0 for i in range(m + 1)] for j in range(n + 1)] for i in range(1, n + 1): for j in range(1, m + 1): if str1[i - 1] == str2[j - 1]: dp[i][j] = dp[i - 1][j - 1] + 1 else: dp[i][j] = max(dp[i - 1][j], dp[i][j - 1]) return dp[n][m]	yes	yes	a-is-better			ja	2023-05-18 20:01:18
914	46	vicuna_62	Implement a Python function to find the longest common subsequence of two input strings using dynamic programming.	tulu_65B	chatgpt	def lcs(str1, str2): n = len(str1) m = len(str2) dp = [[0 for i in range(m + 1)] for j in range(n + 1)] for i in range(1, n + 1): for j in range(1, m + 1): if str1[i - 1] == str2[j - 1]: dp[i][j] = dp[i - 1][j - 1] + 1 else: dp[i][j] = max(dp[i - 1][j], dp[i][j - 1]) return dp[n][m]	Here's one possible implementation: ```python def longest_common_subsequence(s1, s2): m, n = len(s1), len(s2) dp = [[0] * (n+1) for _ in range(m+1)] for i in range(1, m+1): for j in range(1, n+1): if s1[i-1] == s2[j-1]: dp[i][j] = dp[i-1][j-1] + 1 else: dp[i][j] = max(dp[i-1][j], dp[i][j-1]) lcs = "" i, j = m, n while i > 0 and j > 0: if s1[i-1] == s2[j-1]: lcs = s1[i-1] + lcs i -= 1 j -= 1 elif …	no	yes	b-is-better			pr	2023-05-23 16:45:44
14	47	user_oriented_task_208	Make a list of adjectives that can be used to describe the given brand. a creative tech startup	tulu_7B	tulu_65B	1. Innovative 2. Dynamic 3. Cutting-edge 4. Visionary 5. Bold 6. Agile 7. Energetic 8. Entrepreneurial 9. Creative 10. Tech-savvy	1. Innovative 2. Disruptive 3. Bold 4. Visionary 5. Agile 6. Resourceful 7. Ambitious 8. Forward-thinking 9. Adaptable 10. Inventive 11. Imaginative 12. Progressive 13. Dynamic 14. Fresh 15. Original.	yes	yes	tie			ja	2023-05-18 20:01:32
915	47	user_oriented_task_208	Make a list of adjectives that can be used to describe the given brand. a creative tech startup	tulu_65B	tulu_7B	1. Innovative 2. Disruptive 3. Bold 4. Visionary 5. Agile 6. Resourceful 7. Ambitious 8. Forward-thinking 9. Adaptable 10. Inventive 11. Imaginative 12. Progressive 13. Dynamic 14. Fresh 15. Original.	1. Innovative 2. Dynamic 3. Cutting-edge 4. Visionary 5. Bold 6. Agile 7. Energetic 8. Entrepreneurial 9. Creative 10. Tech-savvy	yes	yes	tie			pr	2023-05-23 16:46:23
15	48	user_oriented_task_201	Provide a name for the dish given the ingredients and instructions. INGREDIENTS: 2 (5 oz) cans Bumble Bee® Solid White Albacore Tuna, drained 1 avocado 2 Tbsp Sriracha 1 Tbsp Dijon mustard 2 to 3 Tbsp celery, chopped 2 Tbsp red onion, chopped 2 green onions, chopped 1 Tbsp fresh cilantro, chopped Salt and pepper, to taste 2 heaping cups leafy green lettuce 1 cup matchstick carrots 4 (10 inch) who…	tulu_65B	tulu_7B	Sriracha Tuna Avocado Wraps	Tuna Avocado Wraps	yes	yes	a-is-slightly-better			ja	2023-05-18 20:01:51
916	48	user_oriented_task_201	Provide a name for the dish given the ingredients and instructions. INGREDIENTS: 2 (5 oz) cans Bumble Bee® Solid White Albacore Tuna, drained 1 avocado 2 Tbsp Sriracha 1 Tbsp Dijon mustard 2 to 3 Tbsp celery, chopped 2 Tbsp red onion, chopped 2 green onions, chopped 1 Tbsp fresh cilantro, chopped Salt and pepper, to taste 2 heaping cups leafy green lettuce 1 cup matchstick carrots 4 (10 inch) who…	tulu_65B	tulu_7B	Sriracha Tuna Avocado Wraps	Tuna Avocado Wraps	yes	yes	tie			pr	2023-05-23 16:47:39
16	49	user_oriented_task_71	Discuss the origins and history of the word that has been given to you. oblique	tulu_7B	tulu_65B	The word "oblique" has its origins in the Latin word "obliquus," which means "slanting" or "angled." This word was derived from the verb "obliquus," which means "to slant" or "to incline." The word "oblique" first appeared in the English language in the 14th century, and it has since come to refer to something that is slanting, angled, or not parallel. It is often used to describe an angle that i…	The word "oblique" has its origins in Latin, coming from the Latin word "obliquus," which means "slanting" or "oblique." This word was formed by combining the prefix "ob-" meaning "against" or "opposite" and the root "liquescere," which means "to be fluid." In English, the word "oblique" first appeared in the 15th century as an adjective, meaning "not parallel or perpendicular; slanting." It was …	yes	no	a-is-slightly-better			ja	2023-05-18 20:04:17
917	49	user_oriented_task_71	Discuss the origins and history of the word that has been given to you. oblique	tulu_7B	tulu_65B	The word "oblique" has its origins in the Latin word "obliquus," which means "slanting" or "angled." This word was derived from the verb "obliquus," which means "to slant" or "to incline." The word "oblique" first appeared in the English language in the 14th century, and it has since come to refer to something that is slanting, angled, or not parallel. It is often used to describe an angle that i…	The word "oblique" has its origins in Latin, coming from the Latin word "obliquus," which means "slanting" or "oblique." This word was formed by combining the prefix "ob-" meaning "against" or "opposite" and the root "liquescere," which means "to be fluid." In English, the word "oblique" first appeared in the 15th century as an adjective, meaning "not parallel or perpendicular; slanting." It was …	no	yes	b-is-better			pr	2023-05-23 16:54:41
17	50	user_oriented_task_72	Give the provided brand a motto to use as a part of its marketing strategies. The Ice cream shop is a small, quaint shop located in the heart of the historic district. They offer a variety of ice cream flavors, as well as Italian ice, gelato, and sorbet. The shop has a few tables and chairs, but most of their business is to-go. They offer a loyalty program where you can get a free scoop of ice cr…	chatgpt	tulu_65B	"Scoops of happiness in every cone - The Ice Cream Shop"	"Scoops of happiness in every cone!"	yes	yes	b-is-slightly-better			ja	2023-05-18 20:04:46
918	50	user_oriented_task_72	Give the provided brand a motto to use as a part of its marketing strategies. The Ice cream shop is a small, quaint shop located in the heart of the historic district. They offer a variety of ice cream flavors, as well as Italian ice, gelato, and sorbet. The shop has a few tables and chairs, but most of their business is to-go. They offer a loyalty program where you can get a free scoop of ice cr…	tulu_65B	chatgpt	"Scoops of happiness in every cone!"	"Scoops of happiness in every cone - The Ice Cream Shop"	yes	yes	a-is-slightly-better			pr	2023-05-23 16:56:46
18	51	user_oriented_task_107	Create a daily itinerary based on the given information. Our family is looking for a 9-day Morocco trip that has light to moderate activity levels.	tulu_7B	tulu_65B	Day 1: - Arrival in Morocco - Check-in at the hotel - Explore the local markets and shops in the area Day 2: - Visit the Medina of Fes - Explore the historic sites and architecture - Enjoy a traditional Moroccan dinner Day 3: - Visit the Roman ruins of Volubilis - Explore the ancient city and its history - Enjoy a picnic lunch in the nearby park Day 4: - Visit the Sahara desert - Take a camel rid…	Here is a suggested 9-day itinerary for your family's trip to Morocco: Day 1: Arrival in Marrakech - Arrive in Marrakech and check into your hotel - Spend the afternoon exploring the city, including the famous Jemaa el-Fna square and the Bahia Palace - In the evening, enjoy a traditional Moroccan dinner at a local restaurant Day 2: Marrakech - Start the day with a visit to the Koutoubia Mosque an…	no	yes	b-is-better			ja	2023-05-18 20:06:24
19	52	user_oriented_task_92	Design a programming problem related to the subject that has been given to you. Use some examples and constraints to improve your question. Dynamic Programming	tulu_65B	chatgpt	**Problem:** Longest Common Subsequence (LCS) **Description:** Given two strings, find the longest common subsequence between them. **Example:** Input strings: "ABCDEFG" and "KQJELDHABMXP" Output: "ABCDEFG" **Constraints:** 1. The length of the input strings will be between 1 and 1000. 2. The characters in the input strings will only contain lowercase letters. 3. The output should be the longest …	Problem: Given a list of integers, find the maximum sum of a contiguous subarray. Example: Input: [-2, 1, -3, 4, -1, 2, 1, -5, 4] Output: 6 Explanation: The contiguous subarray [4, -1, 2, 1] has the largest sum of 6. Constraints: - The input list can have at most 10^5 integers. - The integers in the input list can range from -10^4 to 10^4. - The solution must have a time complexity of O(n), where…	no	yes	b-is-better			ja	2023-05-18 20:07:47
20	53	user_oriented_task_184	Decide if the given email belongs to the Promotions or Social category. Subject: You have an invitation Email: Hi, I'd like to join your LinkedIn network.	chatgpt	tulu_65B	Social.	Social	yes	yes	tie			ja	2023-05-18 20:07:57
21	54	vicuna_17	How do vaccinations work to protect individuals and communities from infectious diseases, and what is herd immunity?	chatgpt	tulu_65B	Vaccinations work by introducing a weakened or dead form of a virus or bacteria into the body. This triggers the immune system to produce antibodies that can recognize and fight off the actual virus or bacteria if the person is exposed to it in the future. When a large percentage of a population is vaccinated against a particular disease, it creates herd immunity. This means that even those who a…	Vaccinations work by exposing the immune system to a small, harmless piece of a virus or bacteria. This prompts the body to produce antibodies to fight the infection, which are then stored in the body's memory cells. If the individual is later exposed to the actual virus or bacteria, their immune system is able to quickly produce the antibodies needed to fight the infection, preventing them from …	yes	yes	b-is-slightly-better			ja	2023-05-18 20:08:40
22	55	user_oriented_task_116	Develop a mental exercise that can help people manage their anxiety and explain how it works.	tulu_65B	chatgpt	One mental exercise that can help people manage their anxiety is called "Box Breathing." This technique involves visualizing a box while taking slow, deep breaths. Here's how it works: 1. Find a quiet and comfortable place to sit or lie down. 2. Close your eyes and take a deep breath in through your nose, counting to four. 3. Hold the breath for a count of four. 4. Exhale slowly through your mout…	One mental exercise that can help people manage their anxiety is called "grounding." This exercise involves focusing on the present moment and using your senses to connect with your surroundings. Here's how it works: 1. Find a quiet and comfortable place to sit or stand. 2. Take a few deep breaths and close your eyes. 3. Begin to notice the sensations in your body. Are you feeling tense or relaxe…	yes	yes	tie			ja	2023-05-18 20:09:22
23	56	user_oriented_task_138	In the event that a person enjoyed the book that was given, please suggest other books that they might also like. The Great Gatsby	chatgpt	tulu_65B	1. The Catcher in the Rye by J.D. Salinger 2. To Kill a Mockingbird by Harper Lee 3. The Sun Also Rises by Ernest Hemingway 4. The Bell Jar by Sylvia Plath 5. The Age of Innocence by Edith Wharton 6. The Beautiful and Damned by F. Scott Fitzgerald 7. Tender is the Night by F. Scott Fitzgerald 8. The Picture of Dorian Gray by Oscar Wilde 9. The Grapes of Wrath by John Steinbeck 10. The Sound and t…	If you enjoyed "The Great Gatsby" by F. Scott Fitzgerald, here are some other classic novels that you might also enjoy: 1. "To Kill a Mockingbird" by Harper Lee 2. "Pride and Prejudice" by Jane Austen 3. "1984" by George Orwell 4. "The Adventures of Huckleberry Finn" by Mark Twain 5. "The Catcher in the Rye" by J.D. Salinger 6. "The Sun Also Rises" by Ernest Hemingway 7. "Their Eyes Were Watching…	yes	yes	b-is-slightly-better			ja	2023-05-18 20:10:34
24	57	vicuna_77	Compose an engaging travel blog post about a recent trip to Hawaii, highlighting cultural experiences and must-see attractions.	chatgpt	tulu_65B	Aloha! I recently had the pleasure of visiting the beautiful islands of Hawaii, and I must say, it was an experience of a lifetime. From the stunning beaches to the rich cultural experiences, Hawaii truly has something for everyone. One of the highlights of my trip was visiting the Polynesian Cultural Center on the island of Oahu. This immersive experience allowed me to learn about the history an…	Hawaii is a tropical paradise that offers a unique blend of stunning natural beauty, rich cultural heritage, and exciting adventures. From the moment you arrive, you'll be captivated by the warm Aloha spirit that permeates the islands. On a recent trip to Hawaii, I had the opportunity to explore the best of what this incredible destination has to offer. One of the highlights of my trip was experi…	yes	yes	tie			ja	2023-05-18 20:12:00
25	58	user_oriented_task_100	Make the article available in a second language by translating it into it. Dentistry, also known as dental medicine and oral medicine, is the branch of medicine focused on the teeth, gums, and mouth. It consists of the study, diagnosis, prevention, management, and treatment of diseases, disorders, and conditions of the mouth, most commonly focused on dentition (the development and arrangement of …	chatgpt	tulu_65B	La dentisterie, également connue sous le nom de médecine dentaire et de médecine buccale, est la branche de la médecine axée sur les dents, les gencives et la bouche. Elle comprend l'étude, le diagnostic, la prévention, la gestion et le traitement des maladies, des troubles et des affections de la bouche, le plus souvent axés sur la dentition (le développement et l'arrangement des dents) ainsi qu…	La médecine dentaire, également appelée médecine dentaire ou médecine bucco-dentaire, est la branche de la médecine qui se concentre sur les dents, les gencives et la bouche. Elle se compose de l'étude, du diagnostic, de la prévention, de la prise en charge et du traitement des maladies, des troubles et des affections de la bouche, principalement axés sur la dentition (le développement et l'arran…	yes	yes	b-is-slightly-better			ja	2023-05-18 20:12:54
26	59	user_oriented_task_74	You need to write an email to negotiate your salary.	tulu_65B	chatgpt	Subject: Salary Negotiation Dear [Employer], I hope this email finds you well. I am writing to discuss my current salary and the possibility of a raise. I have been with the company for [length of time] and during that time, I have consistently met and exceeded my performance goals. I have taken on additional responsibilities and have been a valuable contributor to the team. I believe that my con…	Subject: Salary Negotiation Request Dear [Employer’s Name], I am writing to express my gratitude for the job offer and to discuss the salary package that has been offered to me. I am excited about the opportunity to work with your company and I believe that I can make a valuable contribution to the team. After careful consideration, I would like to request a salary increase of [insert amount or p…	yes	yes	a-is-slightly-better			ja	2023-05-18 20:13:22
27	60	vicuna_56	What if Alan Turing had not cracked the Enigma code during World War II?	tulu_65B	chatgpt	The outcome of World War II could have been very different. The Enigma code was a complex system used by the German military to send messages secretly. Cracking the code allowed the Allies to understand and intercept German communications, which gave them a significant advantage in the war. If the code had not been cracked, the war could have lasted longer and the outcome could have been very dif…	If Alan Turing had not cracked the Enigma code during World War II, it is likely that the war would have lasted longer and resulted in more casualties. The Enigma code was used by the Germans to encrypt their military communications, and breaking it allowed the Allies to intercept and decipher messages that provided critical intelligence about German military operations. Without this intelligence…	yes	yes	tie			ja	2023-05-18 20:13:52
28	61	user_oriented_task_62	Create a captivating Instagram caption based on the provided details. Try to think of as many captions as you can. I am sharing images of the first snow of the year taken from a window in an office	tulu_65B	chatgpt	1. "First snowfall of the year, as seen from my office window ❄️🏙️ #firstsnow #winterwonderland" 2. "The first snow of the year is always the most magical 💫 #winteriscoming #snowday" 3. "Nothing beats the first snowfall of the year 🌨️ #wintervibes #snowflakes" 4. "The first snow of the year, as seen from my office window 🏙️❄️ #winterscenery #snowfall" 5. "The first snowfall of the year, as seen f…	1. "Winter wonderland views from the office ❄️❤️ #firstsnow #officeview" 2. "Snowflakes falling, work calling ❄️📞 #winteroffice #snowday" 3. "When work meets winter magic ❄️✨ #snowyoffice #winterwonderland" 4. "Snowy scenes from the 9 to 5 ❄️🏢 #officevibes #firstsnowfall" 5. "Who needs a winter vacation when you have this view from the office? ❄️👀 #snowyday #officegoals" 6. "The first snow of the…	no	yes	b-is-better			ja	2023-05-18 20:14:16
29	62	user_oriented_task_118	Make a list of outdoor activities that are suitable for the given weather condition. Temperature: 57 F, Showers	chatgpt	tulu_65B	1. Hiking with waterproof gear 2. Bird watching from a sheltered area 3. Fishing with rain gear 4. Running or jogging with waterproof clothing 5. Visiting a botanical garden or park with covered areas 6. Playing outdoor games like frisbee or soccer with waterproof gear 7. Taking a nature walk with an umbrella 8. Going on a scenic drive with stops at covered viewpoints 9. Exploring a local outdoor…	1. Hiking 2. Walking 3. Running 4. Fishing 5. Kayaking 6. Canoeing 7. Cycling 8. Picnicking 9. Birdwatching 10. Photography	yes	no	a-is-better			ja	2023-05-18 20:14:34
31	63	vicuna_57	What if the Suez Canal had never been constructed?	tulu_65B	chatgpt	The Suez Canal, which connects the Mediterranean Sea to the Red Sea, was completed in 1869. Its construction was a major engineering feat and had a significant impact on global trade and politics. If the Suez Canal had never been constructed, it is likely that global trade and politics would have been significantly different. One of the main impacts of the Suez Canal was to greatly reduce the tim…	If the Suez Canal had never been constructed, the shipping industry would have had to rely on the much longer and more dangerous route around the southern tip of Africa, known as the Cape of Good Hope. This would have significantly increased shipping times and costs, as well as increased the risk of piracy and other dangers associated with long sea voyages. The development of the Middle East and …	yes	yes	tie			ja	2023-05-18 20:17:01
40	64	user_oriented_task_101	An evaluation of the article's quality should be carried out. In order to do so, you should review the quality of the writing and the explanation of the topic. The 20th century saw a revolution in music listening as the radio gained popularity worldwide and new media and technologies were developed to record, edit and distribute music. Music performances became increasingly visual with the broadc…	chatgpt	tulu_65B	Overall, the article provides a concise overview of the impact of technology on music in the 20th century. The writing is clear and easy to understand, with a good balance of technical information and general explanations. However, the article could benefit from more specific examples and details to support its claims. Additionally, the article could be improved by including more information on t…	The article is of good quality. The writing is clear and concise, and the explanation of the topic is thorough and informative. The article covers the major developments in music listening and technology in the 20th century, including the rise of the radio, the development of new media and technologies for recording and distributing music, and the increasing visual nature of music performances wi…	yes	yes	a-is-slightly-better			ja	2023-05-18 20:55:31
46	65	user_oriented_task_33	Write a short description about the given movie or series. The Witcher (2019)	chatgpt	tulu_65B	The Witcher is a fantasy series based on the book series of the same name by Andrzej Sapkowski. The show follows the story of Geralt of Rivia, a monster hunter who navigates a world filled with magic, politics, and danger. Along the way, he meets powerful sorceresses, dangerous beasts, and a young princess with a dangerous secret. The show is known for its stunning visuals, complex characters, an…	The Witcher is a fantasy series released in 2019, based on the books and video games of the same name. It follows the story of Geralt of Rivia, a monster hunter known as a witcher, as he travels through a dangerous world filled with magic and mythical creatures. Along the way, he encounters a powerful sorceress and a young princess with a mysterious past, and together they navigate the complex po…	yes	yes	a-is-slightly-better			ja	2023-05-18 21:57:46
47	66	user_oriented_task_69	Find the answer that best describes the underlined SAT word. Select the correct option and explain the meaning of the underlined word. Despite the _cacophony, the student tried to study. A. Loud sounds B. Difficult subject C. Late hour D. Low lighting	tulu_65B	chatgpt	The correct option is A. Loud sounds. The word "cacophony" refers to a harsh, discordant mixture of sounds. It is often used to describe a loud, jarring noise that is difficult to listen to or concentrate on. In this context, the student is trying to study despite the loud, discordant noise, which could be coming from a variety of sources such as traffic, construction, or loud music.	A. Loud sounds The underlined word "cacophony" means a harsh, discordant mixture of sounds. In this sentence, it suggests that there were loud and unpleasant noises that made it difficult for the student to study.	yes	yes	tie			ja	2023-05-18 21:58:12
49	67	user_oriented_task_196	You are given a sentence in first-order logic. Translate it into natural language. ∃x∀y(soldier(x)→general(x,y))	tulu_65B	tulu_7B	There is a soldier who is a general.	For every soldier, there is a general who outranks him.	no	no	b-is-slightly-better			yi	2023-06-03 22:00:06
50	68	vicuna_5	Can you explain the basics of quantum computing?	tulu_65B	chatgpt	Quantum computing is a type of computing that uses quantum-mechanical phenomena, such as superposition and entanglement, to perform operations on data. In a classical computer, data is stored in bits, which can have a value of either 0 or 1. In a quantum computer, data is stored in quantum bits, or qubits, which can exist in a state of 0, 1, or both at the same time. This allows quantum computers…	Quantum computing is a type of computing that uses quantum mechanics to process information. Unlike classical computing, which uses bits (either 0 or 1) to represent information, quantum computing uses quantum bits (qubits) that can exist in multiple states simultaneously. This allows quantum computers to perform certain calculations much faster than classical computers. One of the key principles…	yes	yes	tie			ja	2023-05-18 22:00:28
51	69	vicuna_52	What if the Aztecs had successfully repelled the Spanish conquistadors?	tulu_65B	chatgpt	If the Aztecs had successfully repelled the Spanish conquistadors, it is likely that the course of history would have been significantly altered. The Aztec Empire would have been able to continue its rule over its territories, and it is possible that it would have continued to expand and flourish. The Aztecs were a powerful and advanced civilization, with a complex social and political structure,…	If the Aztecs had successfully repelled the Spanish conquistadors, the course of history would have been significantly different. The Aztecs would have continued to rule over their empire, and their culture and traditions would have remained intact. The Spanish would have been forced to look for other sources of wealth and power, and the colonization of the Americas would have been delayed or alt…	yes	yes	tie			ja	2023-05-18 22:03:39
52	70	user_oriented_task_239	Provide instructions for the given exercise. Leg Raises	tulu_7B	tulu_65B	Leg raises are a simple exercise that can be done at home with no equipment needed. Here are the instructions for performing leg raises: 1. Start by lying on your back with your knees bent and feet flat on the ground. 2. Lift your hips off the ground, keeping your knees bent, until your body forms a straight line from head to heels. 3. Hold this position for a few seconds, then lower your hips ba…	Leg Raises is an exercise that targets the abdominal muscles. Here are the instructions to perform this exercise: 1. Lie down on your back with your arms extended above your head and your legs stretched out straight. 2. Keeping your legs straight, raise them up towards the ceiling, contracting your abdominal muscles. 3. Hold the contraction for a moment, then slowly lower your legs back down to t…	no	yes	b-is-better			ja	2023-05-18 22:08:38
53	71	user_oriented_task_170	Based on the information provided, you need to estimate the average summary for the given job. Data entry clerk in United States	tulu_65B	tulu_7B	Based on the information provided, the estimated average salary for a data entry clerk in the United States is $30,930 per year, according to data from the US Bureau of Labor Statistics. However, it is important to note that salaries can vary widely depending on factors such as location, experience, and company.	Based on the information provided, the average summary for a Data Entry Clerk in the United States is: "Data Entry Clerks are responsible for entering data into computer systems, ensuring accuracy and completeness of data, and following established procedures and protocols. They may also perform other tasks such as filing, sorting, and scanning documents. The average salary for a Data Entry Clerk…	yes	yes	a-is-slightly-better			ja	2023-05-18 22:35:23
54	72	user_oriented_task_95	You will need to guide this person through the scenario they have described for the interview. Finally! After a while of shooting in the dark and frantically fiddling with sample inputs on the whiteboard, you've came up with an algorithm for solving the coding question your interviewer gave you. Whew. Such a relief to have a clear path forward. To not be flailing anymore. Now you're cruising, get…	tulu_7B	tulu_65B	Sure, I can help guide you through this scenario. Here's a step-by-step approach you can follow: 1. Listen to what your interviewer is saying: * Try to understand the new perspective they're presenting. * Ask clarifying questions if needed. * Don't interrupt or dismiss their idea outright. 1. Keep your train of thought: * Mentally note the new perspective. * Think about how it might impact your s…	It's understandable to feel tension in this situation, but it's important to try your best to listen to what your interviewer is saying while also staying focused on your current thought process. Take a deep breath and try to clear your mind. Remember that your interviewer is not trying to trick you, but rather to see how you approach problem-solving and how you handle unexpected changes. When yo…	yes	yes	b-is-better			ja	2023-05-18 22:36:16
55	73	user_oriented_task_240	Rewrite the text and correct the spelling errors. It solves problems comon and uniqe to every team.	tulu_65B	tulu_7B	It solves problems common and unique to every team.	It solves problems common and unique to every team.	yes	yes	tie			ja	2023-05-18 22:36:27
56	74	user_oriented_task_123	Plan an agenda for the daily standup meetings. Assign a time duration to each topic on the agenda.	chatgpt	tulu_65B	Agenda for Daily Standup Meetings: 1. Roll call and attendance (1 minute) 2. Progress updates from team members (5 minutes per person) 3. Discussion of any roadblocks or challenges (10 minutes) 4. Review of upcoming tasks and deadlines (5 minutes) 5. Any other business (5 minutes) Total time: 30 minutes	Here is a sample agenda for a daily standup meeting: 1. Welcome and opening remarks (2 minutes) 2. Review of yesterday's accomplishments (2 minutes) 3. Discussion of today's tasks and goals (4 minutes) 4. Identification of any roadblocks or challenges (2 minutes) 5. Open discussion and feedback (2 minutes) 6. Closing remarks and next steps (2 minutes) Total time: 18 minutes. Note: The time durati…	no	yes	b-is-slightly-better			ja	2023-05-18 22:36:52
57	75	user_oriented_task_199	Summarize the movie in a snarky way. Try to explain the movie in just one sentence. The Shining	tulu_7B	tulu_65B	The Shining is a horror movie about a family that moves into a haunted hotel, where the father goes insane and tries to murder his wife and son, only to be thwarted by a ghostly presence that manifests as a creepy twin.	The Shining is a horror movie about a writer who goes insane and tries to kill his family while they're snowed in at a haunted hotel.	no	yes	b-is-better			ja	2023-05-18 22:39:30
58	76	vicuna_13	How can governments utilize fiscal and monetary policies to combat economic recessions?	tulu_7B	tulu_65B	Governments can utilize fiscal and monetary policies to combat economic recessions. Fiscal policy refers to the use of government spending and taxation policies to influence the economy. Monetary policy, on the other hand, refers to the use of the central bank's control over the money supply to influence the economy. During an economic recession, governments can use fiscal policy to stimulate the…	Governments can utilize fiscal and monetary policies to combat economic recessions in several ways. Fiscal policy refers to the use of government spending and taxation to influence the economy. During a recession, the government can use expansionary fiscal policy to stimulate the economy by increasing spending or cutting taxes. This increases the amount of money in circulation and can lead to inc…	yes	yes	a-is-slightly-better			ja	2023-05-18 22:39:48
59	77	user_oriented_task_150	Identify all words that match the pattern given. H_AR_	tulu_7B	tulu_65B	Hear, Hearing, Hearings.	The words that match the pattern H_AR_ are: - HARBOUR - HARBOUR GRACE - HARBOUR GRACEFUL - HARBOUR GRACEFULNESS - HARBOUR GRACEFULNESS - HARBOUR GRACEFULNESS - HARBOUR GRACEFULNESS - HARBOUR GRACEFULNESS - HARBOUR GRACEFULNESS - HARBOUR GRACEFULNESS - HARBOUR GRACEFULNESS - HARBOUR GRACEFULNESS - HARBOUR GRACEFULNESS - HARBOUR GRACEFULNESS - HARBOUR GRACEFULNESS - HARBOUR GRACEFULNESS - HARBOUR G…	yes	no	a-is-better			ja	2023-05-18 22:40:08
60	78	user_oriented_task_131	Describe how to prepare the given food in your own words. Note down the ingredients you will need and the steps you will take to prepare them. Chewy Chocolate Chip Cookies	tulu_65B	chatgpt	To prepare Chewy Chocolate Chip Cookies, you will need the following ingredients: - 2 1/4 cups all-purpose flour - 1 tsp baking soda - 1 tsp salt - 1 cup unsalted butter, at room temperature - 3/4 cup white granulated sugar - 3/4 cup brown sugar - 2 large eggs - 2 tsp vanilla extract - 2 cups semisweet chocolate chips Here are the steps to prepare the cookies: 1. Preheat your oven to 375°F (190°C…	Ingredients: - 2 1/4 cups all-purpose flour - 1 tsp baking soda - 1 tsp salt - 1 cup unsalted butter, at room temperature - 3/4 cup white granulated sugar - 3/4 cup brown sugar - 2 large eggs - 2 tsp vanilla extract - 2 cups semisweet chocolate chips Steps: 1. Preheat the oven to 375°F (190°C). 2. In a medium bowl, whisk together the flour, baking soda, and salt. 3. In a large bowl, cream togethe…	yes	yes	tie			ja	2023-05-18 22:40:53
61	79	user_oriented_task_15	We have entered the home supplies budget in the following table. Calculate the last column with the given function and rewrite the completed table. Note that, columns in a row are separated using a comma, and rows are separated using a "|". Item, Qty, Price, Subtotal | mango, 5, 500, ? | apple, 4, 150, ? | oil, 2, 1500, ? Function: column2 * column 3	chatgpt	tulu_65B	Item, Qty, Price, Subtotal mango, 5, 500, 2500 apple, 4, 150, 600 oil, 2, 1500, 3000	Item, Qty, Price, Subtotal | mango, 5, 500, 2500 | apple, 4, 150, 600 | oil, 2, 1500, 3000 Function: column2 * column 3	yes	yes	a-is-slightly-better			ja	2023-05-18 22:42:24
62	80	user_oriented_task_241	Write down antonyms for the given word. laureating	tulu_7B	tulu_65B	Doubting	Demure, somber, unassuming, uncelebrated, unheralded.	no	yes	b-is-better			ja	2023-05-18 22:42:54
32	81	user_oriented_task_195	You are given a Python command and are required to convert it into Ruby. print("Hello World!")	chatgpt	tulu_65B	puts "Hello World!"	puts "Hello World!"	yes	yes	tie			pr	2023-05-18 20:34:02
33	82	vicuna_75	Draft an apology email to a customer who experienced a delay in their order, and provide reassurance that the issue has been resolved.	chatgpt	tulu_65B	Subject: Apology for Delay in Your Order Dear [Customer Name], I am writing this email to apologize for the delay in your order. We understand how frustrating it can be to wait for your order, and we are truly sorry for any inconvenience this may have caused you. We take full responsibility for the delay and want to assure you that we have taken immediate steps to resolve the issue. Our team has …	Dear [Customer], I am writing to apologize for the delay you experienced with your recent order. We understand the inconvenience and frustration this may have caused, and we deeply regret any disappointment this may have caused. Please know that we take full responsibility for the delay and are taking immediate steps to ensure that this issue does not happen again in the future. Our team is dedic…	yes	yes	b-is-slightly-better			pr	2023-05-18 20:37:06
34	83	vicuna_42	How many atoms are in a grain of salt? Try to explain your answer. Your explanation should take the reader through your reasoning step-by-step.	chatgpt	tulu_65B	A grain of salt is a very small amount of salt, so it is difficult to count the number of atoms in it directly. However, we can use some basic information about the properties of salt to estimate the number of atoms. Salt is a compound made up of two elements: sodium (Na) and chlorine (Cl). The chemical formula for salt is NaCl, which means that each molecule of salt contains one sodium atom and …	A grain of salt is made up of sodium chloride, which has the chemical formula NaCl. NaCl is made up of one sodium atom and one chlorine atom, so there are two atoms in a grain of salt.	yes	no	a-is-better			pr	2023-05-18 20:40:47
35	84	user_oriented_task_185	The story of a movie has been described using many emojis. You need to guess the name of the movie based on the emojis. 🧙‍♂️🚪📚🦅⚡	tulu_65B	chatgpt	The movie being described by these emojis is "Harry Potter and the Philosopher's Stone." 🧙‍♂️ represents Harry Potter, 🚪 represents a secret passage, 📚 represents a book, 🦅 represents a bird (such as an owl), and ⚡ represents magic or electricity.	Harry Potter and the Philosopher's Stone	yes	yes	a-is-slightly-better			yi	2023-06-03 20:44:51
36	85	user_oriented_task_64	Use appropriate emojis to convey the meaning in the given text. Cute cat playful Soft	tulu_7B	tulu_65B	😻🐱🐱🐱	🐱🐈💕🐱🐈💕🐱🐈💕	no	no	tie			pr	2023-05-18 20:46:17
37	86	user_oriented_task_186	Come up with an interesting idea for a new movie plot. Your plot should be described with a title and a summary.	tulu_7B	tulu_65B	Title: "The Chronicles of a Time Traveler" Summary: In the year 2065, a brilliant scientist named Dr. Emily discovers a time-traveling machine that allows her to go back in time and change the course of history. At first, she uses her newfound power to right wrongs and prevent disasters, but soon she realizes the consequences of her actions. As she travels through time, she must navigate the comp…	Title: "Chronicles of the Lost City" Summary: In a world where technology has advanced to the point of being able to teleport to different dimensions, a group of explorers stumble upon an ancient, abandoned city that holds many secrets and mysteries. As they begin to uncover the history of the lost city, they realize that they are not alone and that there are forces at work that threaten to destr…	yes	yes	a-is-slightly-better			pr	2023-05-18 20:48:57
38	87	user_oriented_task_190	Convert the given description to a bash command. read the first 10 lines from f	chatgpt	tulu_65B	head -n 10 f	head -n 10 f	yes	yes	tie			pr	2023-05-18 20:49:14
39	88	user_oriented_task_13	You are provided with a description of the code, specifications, or prompts. Your help is needed in automating code generation to speed up the development process. python function to determine whether a number is prime.	tulu_65B	chatgpt	def is_prime(n): if n <= 1: return False for i in range(2, int(n ** 0.5) + 1): if n % i == 0: return False return True	Here's a Python function that determines whether a number is prime: ``` def is_prime(n): if n < 2: return False for i in range(2, int(n ** 0.5) + 1): if n % i == 0: return False return True ``` The function takes an integer `n` as input and returns `True` if `n` is prime, and `False` otherwise. The function first checks if `n` is less than 2, since 2 is the smallest prime number. If `n` is less t…	yes	yes	tie			pr	2023-05-18 20:52:36
41	89	user_oriented_task_90	You are given a question and two possible answers. The task is to evaluate each answer and determine if it is correct. If incorrect, explain why. Is there a way of reading one single character from the user input? For instance, they press one key at the terminal and it is returned (sort of like getch()). I know there's a function in Windows for it, but I'd like something that is cross-platform. A…	tulu_65B	tulu_7B	Answer 1 is correct. The link provided in the answer explains how to read a single character from the user input in Windows, Linux, and OSX using the getch() function. This function is not available in all platforms, so the recipe provides a cross-platform solution using the termios library in Linux and the conio library in Windows. Answer 2 is incorrect. The input() function in Python does not h…	Answer 1 is correct. The link provided shows how to read a single character in Windows, Linux, and OSX using the `getch()` function. Answer 2 is incorrect. The `input()` function is used to read input from the keyboard, but it does not hold the screen. To hold the screen, you can use the `system32` library in Python, which provides a function called `system32.set_cursor_pos()`. This function allo…	yes	no	a-is-better			pr	2023-05-18 21:00:26
42	90	user_oriented_task_177	Recommend some helpful activities or conversation starters to use at meetups to break the ice.	chatgpt	tulu_65B	1. Two Truths and a Lie: Each person shares three statements about themselves, two of which are true and one is a lie. The group then has to guess which statement is the lie. 2. Name Game: Each person says their name and something they like that starts with the same letter as their name. For example, "Hi, I'm Sarah and I love sushi." 3. Would You Rather: Ask a series of "would you rather" questio…	Here are some helpful activities and conversation starters that you can use at meetups to break the ice: 1. Icebreaker games: There are many icebreaker games that you can play at meetups to help people get to know each other. Some examples include "Two Truths and a Lie," "Never Have I Ever," and "The Question Game." 2. Group discussions: Start a group discussion on a topic that is relevant to the…	yes	yes	tie			pr	2023-05-18 21:38:14
43	91	user_oriented_task_36	In what genres does the given movie or series fall? Manifest	tulu_7B	tulu_65B	Manifest is a science fiction and drama series.	Manifest is a science fiction drama television series.	yes	yes	tie			pr	2023-05-18 21:39:24
69	91	user_oriented_task_36	In what genres does the given movie or series fall? Manifest	tulu_65B	tulu_7B	Manifest is a science fiction drama television series.	Manifest is a science fiction and drama series.	yes	yes	tie			va	2023-05-18 23:00:47
44	92	vicuna_14	How do language and cultural barriers affect the way people communicate and form relationships in multicultural societies?	tulu_7B	tulu_65B	Language and cultural barriers can have a significant impact on the way people communicate and form relationships in multicultural societies. Language is a fundamental tool for communication, and when people speak different languages, it can be difficult to convey thoughts and feelings effectively. This can lead to misunderstandings, confusion, and frustration, which can in turn affect the way pe…	Language and cultural barriers can have a significant impact on the way people communicate and form relationships in multicultural societies. Here are some ways in which these barriers can affect communication and relationships: 1. Misunderstandings: Language barriers can lead to misunderstandings and miscommunications, which can cause confusion and conflict. For example, idioms and colloquial ex…	yes	yes	b-is-better			pr	2023-05-18 21:44:49
45	93	user_oriented_task_158	The given text must be classified as offensive or not offensive. You acted really crazy last night.	tulu_65B	tulu_7B	Not offensive.	Offensive.	no	yes	b-is-better			pr	2023-05-18 21:45:51
63	94	user_oriented_task_209	Someone gives you some information about where they want to go and what they enjoy seeing and doing. Describe a proper road trip for them and find the best stops and sctivities in the way. I'm looking for a west coast road trip. My goal is to start near San Diego and travel to Los Angeles.	chatgpt	tulu_65B	Great! Starting in San Diego, you can begin your road trip by visiting the famous San Diego Zoo and Balboa Park. From there, head north to La Jolla Cove to see the sea lions and enjoy the beautiful beaches. Next, make your way to Orange County and stop at Disneyland for a day of fun and adventure. After that, continue north to Newport Beach and take a sunset cruise to see the stunning coastline. …	Sure, I can help you plan a road trip from San Diego to Los Angeles that will be fun and exciting for you. Here are some of the best stops and activities you can include in your trip: 1. San Diego Zoo: Start your trip by visiting the world-famous San Diego Zoo, which is home to over 3,500 animals from more than 650 species. 2. La Jolla Cove: After the zoo, head to La Jolla Cove, a beautiful beach…	yes	yes	b-is-slightly-better			pr	2023-05-18 22:49:07
65	95	user_oriented_task_219	Write a Jira ticket for the given task. New Employee onboarding	tulu_65B	chatgpt	**Summary:** New Employee Onboarding **Description:** Create a new Jira ticket for the task of onboarding a new employee. This task includes setting up their workstation, creating their employee account, and providing any necessary training or orientation. **Steps:** 1. Set up new employee's workstation with necessary software and equipment. 2. Create new employee account in all relevant systems …	Summary: Onboarding process for new employees Description: As a company, we need to have a standardized onboarding process for new employees to ensure that they have a smooth transition into their new role. This process should include orientation, training, and introductions to key team members and company policies. Tasks: - Develop a comprehensive onboarding plan - Create a checklist for new emp…	yes	yes	b-is-slightly-better			pr	2023-05-18 22:53:55
66	96	user_oriented_task_46	Suggest some Audiobooks for First-Time Listeners. You can attract them by choosing popular works.	tulu_65B	tulu_7B	Here are some popular audiobooks that are great for first-time listeners: 1. "The Great Gatsby" by F. Scott Fitzgerald, narrated by Jake Gyllenhaal 2. "To Kill a Mockingbird" by Harper Lee, narrated by Sissy Spacek 3. "Pride and Prejudice" by Jane Austen, narrated by Rosamund Pike 4. "The Adventures of Sherlock Holmes" by Sir Arthur Conan Doyle, narrated by Stephen Fry 5. "The Hitchhiker's Guide …	Here are some popular audiobooks that are great for first-time listeners: 1. "To Kill a Mockingbird" by Harper Lee - This classic novel is a must-listen for anyone new to audiobooks. It's a powerful story about racism and injustice, told through the eyes of a young girl. 2. "The Great Gatsby" by F. Scott Fitzgerald - This timeless novel is a great introduction to audiobooks, with its themes of lo…	yes	yes	b-is-slightly-better			pr	2023-05-18 22:55:12
67	97	user_oriented_task_51	Please suggest a few papers to consider based on the search term given. The names of the papers should be listed. Topic: scaling law + machine learning	tulu_65B	tulu_7B	1. "A scaling law for deep learning" by Yann LeCun, Yoshua Bengio, and Geoffrey Hinton 2. "On the number of linear regions in deep neural networks with ReLU activation functions" by Nitish Shirish Keskar, Dheevatsa Mudigere, and Anandkumar J 3. "A theory of deep learning via hierarchical linear algebra" by Sanjeev Arora, Simon S. Du, and Wei Hu 4. "A scaling law for deep learning with ReLU activa…	1. "Adaptive learning rates for deep neural networks" by K. Simpson, J. D. C. Fisher, and A. D. Murray (2018) 2. "On the scaling of deep learning" by A. D. Murray, K. Simpson, and J. D. C. Fisher (2019) 3. "The scaling of deep learning with respect to computational resources" by A. D. Murray, K. Simpson, and J. D. C. Fisher (2020) 4. "The scaling of deep learning with respect to data size" by A. …	no	no	tie			pr	2023-05-18 22:57:19
68	98	user_oriented_task_91	You are given two questions. Check if they are duplicates. Question1: I am trying to understand the advantages of multiprocessing over threading. I know that multiprocessing gets around the Global Interpreter Lock, but what other advantages are there, and can threading not do the same thing? Question2: I am learning how to use the threading and the multiprocessing modules in Python to run certain…	tulu_65B	chatgpt	no	The two questions are similar but not duplicates. They both ask about the differences between threading and multiprocessing in Python and how to use them effectively, but the second question also includes a specific question about how to instantiate a queue of jobs and limit the number of parallel processes. Additionally, the second question asks for resources to learn more about the concepts beh…	yes	yes	b-is-better			pr	2023-05-18 23:00:19
70	99	user_oriented_task_24	Write a template for First-Person LinkedIn profile summary.	tulu_65B	chatgpt	Here's a template for a first-person LinkedIn profile summary: --- Hi, I'm [Your Name], a [Your Title/Profession] with [Number of Years] years of experience in [Your Industry/Field]. I'm passionate about [Your Passion/Specialty], and I'm always looking for new ways to [Your Goal/Mission]. Throughout my career, I've had the opportunity to [Your Accomplishments/Experience], and I'm proud to have [Y…	As an AI language model, I am not capable of creating a LinkedIn profile summary for myself. However, here is a template for a first-person LinkedIn profile summary that you can use: [Name], [Job Title] [Summary Statement] [Experience] [Education] [Skills] [Interests] [Call to Action]	yes	no	a-is-better			pr	2023-05-18 23:02:02
71	100	user_oriented_task_232	You are given a tweet and you should decide whether it's offensive or not. She has certainly taken some heat for being such an....well idiot.	tulu_65B	tulu_7B	Offensive	Yes, the tweet is offensive.	yes	yes	tie			pr	2023-05-18 23:02:32
250	101	user_oriented_task_148	A list of all movies that meet the criteria given should be compiled. movies directed by Spike Lee by release date	tulu_65B	tulu_7B	Here is a list of all the movies directed by Spike Lee, ordered by release date: 1. She's Gotta Have It (1986) 2. School Daze (1988) 3. Do the Right Thing (1989) 4. Mo' Better Blues (1990) 5. Jungle Fever (1991) 6. Malcolm X (1992) 7. Crooklyn (1994) 8. Clockers (1995) 9. Girl 6 (1996) 10. Get on the Bus (1996) 11. He Got Game (1998) 12. Summer of Sam (1999) 13. Bamboozled (2000) 14. 25th Hour (2…	Here is a list of all movies directed by Spike Lee by release date: 1. She's Gotta Have It (1989) 2. Do the Right Thing (1989) 3. School Daze (1988) 4. Lee Daniels' The Butler (2013) 5. Chi-Raq (2015) 6. BlacKkKlansman (2018) 7. Clocktower (2021) 8. Da 5 Bloods (2022) Note: This list is accurate as of my knowledge cutoff date of September 2021.	no	no	a-is-slightly-better			pr	2023-05-19 14:51:34
251	102	user_oriented_task_136	Choose the best books from the given genre. Crime & Mystery	tulu_65B	chatgpt	1. "The Adventures of Sherlock Holmes" by Sir Arthur Conan Doyle 2. "The Hound of the Baskervilles" by Sir Arthur Conan Doyle 3. "The Maltese Falcon" by Dashiell Hammett 4. "The Big Sleep" by Raymond Chandler 5. "The Name of the Rose" by Umberto Eco 6. "The Silence of the Lambs" by Thomas Harris 7. "The Girl with the Dragon Tattoo" by Stieg Larsson 8. "The Da Vinci Code" by Dan Brown 9. "The Murd…	1. "The Girl with the Dragon Tattoo" by Stieg Larsson 2. "The Silence of the Lambs" by Thomas Harris 3. "Gone Girl" by Gillian Flynn 4. "The Da Vinci Code" by Dan Brown 5. "The Adventures of Sherlock Holmes" by Arthur Conan Doyle 6. "The Murder of Roger Ackroyd" by Agatha Christie 7. "The Big Sleep" by Raymond Chandler 8. "The Maltese Falcon" by Dashiell Hammett 9. "The Silence of the Sea" by Yrs…	yes	yes	a-is-slightly-better			pr	2023-05-19 14:54:00
252	103	user_oriented_task_235	Categorize the Business into one of the Restaurants, Home Services, Auto Services and Miscellaneous based on its Specialties. Call us at 650-636-4884 or visit our website to receive a quote. This shop specializes in New Tires and General Auto Repair. We carry all tires in-house and have a wide range to fit any budget or car specifics. If you are unsure what tires you need there are experts on han…	tulu_65B	chatgpt	Auto Services	Auto Services	yes	yes	tie			pr	2023-05-19 14:54:25
253	104	vicuna_57	What if the Suez Canal had never been constructed?	tulu_7B	tulu_65B	The Suez Canal is a waterway that connects the Mediterranean Sea to the Red Sea, allowing ships to travel between Europe and Asia without having to navigate around Africa. If the Suez Canal had never been constructed, it would have had a significant impact on global trade and commerce. Before the Suez Canal was built, ships had to travel around the southern tip of Africa, which added a significan…	The Suez Canal, which connects the Mediterranean Sea to the Red Sea, was completed in 1869. Its construction was a major engineering feat and had a significant impact on global trade and politics. If the Suez Canal had never been constructed, it is likely that global trade and politics would have been significantly different. One of the main impacts of the Suez Canal was to greatly reduce the tim…	yes	yes	b-is-slightly-better			pr	2023-05-19 14:56:38
254	105	user_oriented_task_183	Categorize the given magazine based on its content into one of the categories: Politics, Entertainment News, Tech News, Business News, Parenting & Kids, Health & Healing, Cooking, Food & Wine, and Arts & Literature, Inc.	tulu_65B	tulu_7B	Business News	Based on the content of the magazine, it can be categorized as Business News.	yes	yes	tie			pr	2023-05-19 14:57:31
256	106	user_oriented_task_15	We have entered the home supplies budget in the following table. Calculate the last column with the given function and rewrite the completed table. Note that, columns in a row are separated using a comma, and rows are separated using a "|". Item, Qty, Price, Subtotal | mango, 5, 500, ? | apple, 4, 150, ? | oil, 2, 1500, ? Function: column2 * column 3	tulu_65B	tulu_7B	Item, Qty, Price, Subtotal | mango, 5, 500, 2500 | apple, 4, 150, 600 | oil, 2, 1500, 3000 Function: column2 * column 3	I'm sorry, but I cannot complete the table as there is no information provided about the function to be used in the last column. Could you please provide the function that you would like me to use to calculate the subtotal?	yes	no	a-is-better			pr	2023-05-19 14:58:43
275	107	user_oriented_task_94	Think of topics that are most common in classic interview questions for a job in computer science.	tulu_7B	tulu_65B	Here are some common topics in classic interview questions for a job in computer science: 1. Algorithms and data structures: Questions on sorting, searching, and graph algorithms, as well as data structures like stacks, queues, and trees. 2. Programming languages: Questions on language syntax, data types, control structures, and functions. 3. Operating systems: Questions on processes, threads, me…	1. Data structures and algorithms 2. Object-oriented programming 3. Database management systems 4. Computer architecture and operating systems 5. Networking and communication protocols 6. Web development and design 7. Software development methodologies 8. Programming languages (e.g. Java, Python, C++, etc.) 9. Computer security and cryptography 10. Artificial intelligence and machine learning.	yes	yes	a-is-slightly-better			pr	2023-05-19 16:54:48
278	108	user_oriented_task_193	Given a sentence that may be ambiguous, rewrite the sentence using less ambiguous words. The chicken is ready to eat.	tulu_65B	tulu_7B	The chicken is fully cooked and prepared for consumption.	The chicken is prepared for consumption.	yes	yes	b-is-slightly-better			pr	2023-05-19 16:55:46
281	109	user_oriented_task_5	If you could help me write an email to my friends inviting them to dinner on Friday, it would be greatly appreciated.	tulu_65B	chatgpt	Sure, I'd be happy to help you write an email to your friends inviting them to dinner on Friday. Here's a basic template you could use: Subject: Join me for dinner on Friday Dear [Friend's Name], I hope this email finds you well. I would like to invite you to join me for dinner on Friday at [restaurant or home]. It's been a while since we caught up, and I would love to have the chance to spend so…	Subject: Dinner Invitation for Friday Dear [Friend’s Name], I hope this email finds you well. I am writing to invite you to a dinner party at my place this Friday. It has been a while since we all got together, and I thought it would be a great opportunity to catch up and have some fun. The dinner will start at [time] and will be held at my place [address]. I will be preparing some delicious dish…	yes	yes	tie			pr	2023-05-19 16:57:36
282	110	user_oriented_task_130	Make a list of snacks and foods to serve as party snacks on a game day!	tulu_7B	tulu_65B	Here is a list of snacks and foods that you could serve as party snacks on a game day: - Chips and dip - Popcorn - Pizza - Hot dogs - Soda - Juice boxes - Fruit skewers - Veggie sticks with hummus - Cheese and crackers - Cookies - Brownies - Candy - Cupcakes - Fondue - Sliders - Tacos - Nachos - Pretzels - Chocolate fondue - Coffee and tea - Coffee and hot chocolate - Water and soda	Here are some ideas for snacks and foods to serve on game day: 1. Chips and dip 2. Pizza 3. Hot dogs 4. Sliders 5. Wings 6. Nachos 7. Popcorn 8. Soft pretzels 9. Cheese and crackers 10. Fruit and veggie trays 11. Meatballs 12. Chicken tenders 13. Quesadillas 14. Desserts such as cookies, brownies, and cupcakes 15. Beverages such as soda, beer, and wine.	yes	yes	tie			pr	2023-05-19 16:58:25
286	111	user_oriented_task_157	Currently, there is a chat in which people are arranging a meeting in the future. Retrieve the meeting information from the conversation. Person 1: Hey, when are you free? I'd like to meet up. Person 2: I'm free tomorrow afternoon. Person 1: Great, what time? Person 2: How about 3 pm? Person 1: I have another meeting at that time. what about 5 pm? Person 2: That works. Where should we meet? Perso…	tulu_7B	tulu_65B	The meeting is scheduled for tomorrow at 5 pm at the coffee shop on Main Street.	The meeting will take place tomorrow at 5 pm at the coffee shop on Main Street.	yes	yes	tie			pr	2023-05-19 16:59:11
289	112	user_oriented_task_28	Take the title of the product and extract its attributes. The attributes in this case refer to the characteristics of the products, such as their brand and color. Your answer must a list following the format of "attribute: value". SAMSUNG 980 PRO SSD 2TB PCIe NVMe Gen 4 Gaming M.2 Internal Solid State Hard Drive Memory Card, Maximum Speed, Thermal Control, MZ-V8P2T0B	tulu_7B	tulu_65B	brand: Samsung color: black	brand: SAMSUNG color: black	no	no	tie			pr	2023-05-19 17:00:42
294	113	vicuna_4	How can I increase my productivity while working from home?	chatgpt	tulu_65B	As an AI language model, I don't have personal experience, but here are some tips that may help you increase your productivity while working from home: 1. Set up a designated workspace: Create a dedicated workspace that is free from distractions and has all the necessary equipment and supplies. 2. Stick to a routine: Establish a routine that includes regular work hours, breaks, and time for exerc…	Here are some tips to increase your productivity while working from home: 1. Set up a dedicated workspace: Having a designated work area can help you stay focused and organized. 2. Establish a routine: Stick to a regular schedule to help you stay on track and manage your time effectively. 3. Take breaks: Regular breaks can help you recharge and refocus. Step away from your work area, stretch your…	yes	yes	tie			pr	2023-05-19 17:02:04
298	114	user_oriented_task_28	Take the title of the product and extract its attributes. The attributes in this case refer to the characteristics of the products, such as their brand and color. Your answer must a list following the format of "attribute: value". SAMSUNG 980 PRO SSD 2TB PCIe NVMe Gen 4 Gaming M.2 Internal Solid State Hard Drive Memory Card, Maximum Speed, Thermal Control, MZ-V8P2T0B	chatgpt	tulu_65B	Brand: Samsung Product Name: 980 PRO SSD Capacity: 2TB Interface: PCIe NVMe Gen 4 Form Factor: M.2 Type: Internal Solid State Hard Drive Memory Card Speed: Maximum Thermal Control: Yes Model Number: MZ-V8P2T0B	brand: SAMSUNG color: black	yes	no	a-is-better			pr	2023-05-19 17:04:50
306	115	user_oriented_task_241	Write down antonyms for the given word. laureating	chatgpt	tulu_65B	criticizing, condemning, disapproving, censuring, denouncing, reproaching, rebuking, reprimanding, blaming, faulting.	Demure, somber, unassuming, uncelebrated, unheralded.	yes	no	a-is-slightly-better			pr	2023-05-19 17:09:16
308	116	user_oriented_task_86	Make a questionnaire to help hotel guests write hotel reviews.	tulu_65B	chatgpt	1. How would you rate your overall experience at our hotel? 2. How comfortable was your stay in our hotel? 3. How would you rate the cleanliness of our hotel? 4. How would you rate the friendliness and helpfulness of our staff? 5. How would you rate the location of our hotel? 6. How would you rate the amenities and facilities provided by our hotel? 7. How would you rate the food and beverage serv…	1. How would you rate the cleanliness of the hotel room? a. Excellent b. Good c. Average d. Poor 2. How would you rate the quality of the hotel amenities? a. Excellent b. Good c. Average d. Poor 3. How would you rate the hotel staff's friendliness and helpfulness? a. Excellent b. Good c. Average d. Poor 4. How would you rate the hotel's location? a. Excellent b. Good c. Average d. Poor 5. How wou…	yes	yes	b-is-slightly-better			pr	2023-05-19 17:10:05
311	117	user_oriented_task_61	Create a detailed caption for an Instagram post about a discount. A proper caption should explain the product, offer the discount, and tell the user how to claim it. Product: Golang course Product description: teaching the foundational skills for building cloud services, web applications, DevOps tools, and backend development Discount: 50% How to claim: Use the coupon code: GOLANG	tulu_65B	tulu_7B	🚀Ready to take your coding skills to the next level? Check out our Golang course, where you'll learn the foundational skills for building cloud services, web applications, DevOps tools, and backend development! 💻 We're excited to offer you a 50% discount on this comprehensive course. To claim your discount, simply use the coupon code: GOLANG at checkout. Don't miss this opportunity to save big an…	🚨Hot Deal Alert🚨 Get ready to level up your coding skills with our Golang course! 💻🔧 📚Learn the foundational skills for building cloud services, web applications, DevOps tools, and backend development with our Golang course. 💻🔧 🎉Don't miss out on this amazing opportunity! 🎉 🔹Use the coupon code: GOLANG to get 50% off your purchase! 🔹 📝Claim your discount now and start building like a pro! 📝 💻🔧💻🔧💻…	yes	yes	b-is-slightly-better			pr	2023-05-19 17:11:19
317	118	user_oriented_task_96	You are given a programming problem and its implementation. Analyze the problem and implementation and explain the algorithm and approach used to solve the problem. Table: Person | Column Name | Type | | personId | int | | lastName | varchar | | firstName | varchar | personId is the primary key column for this table. This table contains information about the ID of some persons and their first and…	tulu_65B	chatgpt	The given problem is to report the first name, last name, city, and state of each person in the Person table. If the address of a personId is not present in the Address table, report null instead. The given implementation uses a left join to combine the Person and Address tables. This join allows for the retrieval of all records from the Person table, even if there is no matching record in the Ad…	Algorithm and Approach: The problem requires us to retrieve the first name, last name, city, and state of each person in the Person table. We need to join the Person and Address tables on the personId column to get the required information. We use a left join to ensure that all the rows from the Person table are included in the result set, even if there is no matching row in the Address table. Th…	yes	yes	tie			pr	2023-05-19 17:13:34
319	119	user_oriented_task_215	Suggest some product bundles that are often purchased with a given product. MacBook Air	chatgpt	tulu_65B	1. Apple AirPods 2. USB-C Hub 3. Laptop Sleeve/Case 4. External Hard Drive 5. Wireless Mouse 6. Laptop Stand 7. AppleCare+ Protection Plan 8. Portable Charger 9. Bluetooth Headphones 10. Keyboard Cover.	1. MacBook Air + AppleCare Protection Plan: This bundle includes the MacBook Air laptop along with an extended warranty and technical support plan from Apple. 2. MacBook Air + Apple Magic Keyboard: This bundle includes the MacBook Air laptop along with a wireless Magic Keyboard from Apple. 3. MacBook Air + Apple AirPods: This bundle includes the MacBook Air laptop along with a pair of wireless Ap…	yes	yes	tie			pr	2023-05-19 17:14:22
324	120	vicuna_5	Can you explain the basics of quantum computing?	tulu_7B	tulu_65B	Quantum computing is a type of computing that uses quantum-mechanical phenomena, such as superposition and entanglement, to perform operations on data. In a classical computer, data is stored in bits, which can have a value of either 0 or 1. In a quantum computer, data is stored in quantum bits, or qubits, which can exist in multiple states simultaneously. This allows quantum computers to perform…	Quantum computing is a type of computing that uses quantum-mechanical phenomena, such as superposition and entanglement, to perform operations on data. In a classical computer, data is stored in bits, which can have a value of either 0 or 1. In a quantum computer, data is stored in quantum bits, or qubits, which can exist in a state of 0, 1, or both at the same time. This allows quantum computers…	yes	yes	tie			pr	2023-05-19 17:15:16
713	121	user_oriented_task_42	Write a simple guide for uploading the bibliography database on Overleaf.	chatgpt	tulu_65B	1. First, make sure you have a bibliography database file in a compatible format such as .bib or .ris. 2. Open your Overleaf project and navigate to the "Files" section on the left-hand side of the screen. 3. Click on the "Upload" button and select your bibliography database file from your computer. 4. Once the file has finished uploading, you can reference it in your LaTeX document using the \bi…	Sure, here's a simple guide for uploading a bibliography database on Overleaf: 1. Create a new project on Overleaf or open an existing one. 2. Click on the "Bibliography" button on the left side of the screen. 3. Select "New Bibliography Database" from the drop-down menu. 4. Choose the type of bibliography style you want to use (e.g. APA, MLA, etc.). 5. Click on the "Add Items" button to start ad…	yes	no	a-is-better			yi	2023-05-21 02:23:20
469	122	vicuna_46	How many words are spoken daily on Earth? Try to explain your answer. Your explanation should take the reader through your reasoning step-by-step.	tulu_65B	chatgpt	The average person speaks about 150 words per minute. The average person speaks for about 1 hour per day. That means the average person speaks 150 * 60 = 9000 words per day. There are about 8 billion people on earth. So that means that about 8 * 9000 = 72,000,000,000 words are spoken on earth every day. The answer: 72.	As an AI language model, I do not have access to the exact number of words spoken daily on Earth. However, I can provide an estimate based on some assumptions and available data. Firstly, we need to consider the total population of the Earth. According to the United Nations, the world population as of 2021 is approximately 7.9 billion people. Next, we need to estimate the average number of words …	no	yes	b-is-better			va	2023-05-19 21:12:08
471	123	vicuna_70	If the endpoints of a line segment are (2, -2) and (10, 4), what is the length of the segment?	tulu_65B	tulu_7B	The length of a line segment can be calculated using the distance formula, which is derived from the Pythagorean Theorem. The distance formula states that the length of a line segment with endpoints (x1, y1) and (x2, y2) is given by the following equation: distance = sqrt((x2 - x1)^2 + (y2 - y1)^2) In this case, the endpoints of the line segment are (2, -2) and (10, 4), so we can plug these value…	The length of the line segment is 8.	yes	no	a-is-better			va	2023-05-19 21:13:56
472	124	user_oriented_task_167	Choose an appealing title for your post. The typical avocado is over 300 calories from the oil in it. That’s the amount of calories in a large candy bar. If you get enough exercise to eat a large candy bar every day without gaining weight, it wouldn’t be a problem to eat an avocado every day. Other wise you should probably eat them sparingly.	tulu_65B	tulu_7B	Are Avocados Good For Weight Loss?	"The Truth About Avocados: Are They a Weight Loss Friend or Foe?"	yes	yes	tie			va	2023-05-19 21:15:50
473	125	vicuna_51	What if the Internet had been invented during the Renaissance period?	chatgpt	tulu_65B	If the Internet had been invented during the Renaissance period, it would have had a significant impact on the world. Here are some possible scenarios: 1. Increased exchange of ideas: The Renaissance was a time of great intellectual and artistic growth, and the Internet would have facilitated the exchange of ideas between scholars, artists, and thinkers across Europe. This could have led to even …	If the internet had been invented during the Renaissance period, it would have had a significant impact on the development of knowledge and communication during that time. The Renaissance was a period of great intellectual and cultural achievement, marked by significant advancements in science, art, literature, and philosophy. The invention of the internet during this time would have accelerated …	yes	yes	b-is-slightly-better			va	2023-05-19 21:16:53
474	126	user_oriented_task_120	In relation to the given weather scenario, give some tips on how to adjust the travel plans with it. a sudden temperature change	tulu_65B	tulu_7B	If there is a sudden temperature change, it is important to adjust your travel plans accordingly. Here are some tips to help you: 1. Check the weather forecast: Before you leave, check the weather forecast for your destination and the route you will be taking. This will help you to be prepared for any changes in the weather. 2. Dress appropriately: Make sure to dress appropriately for the weather…	If you are planning a trip and encounter a sudden temperature change, here are some tips on how to adjust your travel plans: 1. Check the weather forecast: Before you leave, check the weather forecast for the destination and plan accordingly. If the temperature is expected to drop significantly, bring warm clothing and layers. 2. Pack for the weather: Pack clothing that is appropriate for the wea…	yes	yes	tie			va	2023-05-19 21:20:31
481	127	vicuna_61	Develop a C++ program that reads a text file line by line and counts the number of occurrences of a specific word in the file.	tulu_65B	chatgpt	#include <iostream> #include <fstream> #include <string> using namespace std; int main() { ifstream file; string word; int count = 0; file.open("file.txt"); if (file.is_open()) { cout << "File opened successfully" << endl; while (getline(file, word)) { if (word == "word") { count++; } } file.close(); cout << "Number of occurrences of word: " << count << endl; } else { cout << "Unable to open file…	As an AI language model, I cannot create a file on your computer. However, I can provide you with the code to read a text file line by line and count the number of occurrences of a specific word in the file. Here is the code: ``` #include <iostream> #include <fstream> #include <string> using namespace std; int main() { string filename, word; int count = 0; cout << "Enter the filename: "; cin >> f…	yes	yes	tie			va	2023-05-19 21:30:52
483	128	user_oriented_task_43	Choose Spotify playlists that match the given mood. Provide a link to these playlists for easy access. Feeling Good	chatgpt	tulu_65B	1. "Feelin' Good" by Spotify: https://open.spotify.com/playlist/37i9dQZF1DWZeKCadgRdKQ 2. "Good Vibes" by Spotify: https://open.spotify.com/playlist/37i9dQZF1DWZeKCadgRdKQ 3. "Happy Hits!" by Spotify: https://open.spotify.com/playlist/37i9dQZF1DXdPec7aLTmlC 4. "Mood Booster" by Spotify: https://open.spotify.com/playlist/37i9dQZF1DX3rxVfibe1L0 5. "Feel Good Friday" by Spotify: https://open.spotify…	Here are some Spotify playlists that match the mood of feeling good: 1. "Good Vibes" - https://open.spotify.com/user/spotify/playlist/37i9dQZF1jQEwjWU6Gjnjx 2. "Happy Hits" - https://open.spotify.com/user/spotify/playlist/37i9dQZF1jQEwjWU6Gjnjx 3. "Feel Good" - https://open.spotify.com/user/spotify/playlist/37i9dQZF1jQEwjWU6Gjnjx These playlists feature upbeat and happy songs that are sure to lif…	yes	yes	tie			va	2023-05-19 21:31:25
484	129	user_oriented_task_171	Describe the responsibilities of the given job. Security Officer	tulu_7B	tulu_65B	A Security Officer is responsible for ensuring the safety and security of a specific area or facility. This may include monitoring access points, conducting patrols, and responding to emergencies. They may also be responsible for maintaining security systems, such as CCTV cameras, and ensuring that all security protocols are followed. Additionally, Security Officers may be required to conduct bac…	A Security Officer is responsible for protecting people, property, and assets by enforcing laws, preventing crime, and maintaining a safe and secure environment. Their specific responsibilities may vary depending on the industry or organization they work for, but some common duties include: 1. Patrolling designated areas on foot or in a vehicle to prevent and detect crime. 2. Responding to alarms…	yes	yes	tie			va	2023-05-19 21:32:25
485	130	user_oriented_task_110	Think of an idea to help you win a challenge given to you. Write the steps you need to take to develop the idea as well. What can you make by recycling and repurposing some old, previously used materials? We want to see it! Projects must incorporate some kind of used materials - take that old used thing, and turn it into something new and different! E-waste is a huge problem. What can you make us…	tulu_7B	tulu_65B	One idea to help you win a challenge like this is to create a "Smart Garden" using old, repurposed materials. Here are the steps to develop the idea: 1. Gather materials: Collect old electronics such as smartphones, tablets, and laptops. You can also use old printer cartridges, cables, and other electronic components. 2. Design the garden: Use the old electronics to create a smart garden that can…	To develop an idea for this challenge, I would follow these steps: 1. Research: Start by researching the types of materials that can be recycled and repurposed. This could include old clothes, paper, plastic, glass, metal, and electronics. Look for inspiration from other projects that have successfully repurposed these materials. 2. Brainstorm: Once you have a good understanding of the materials …	yes	no	a-is-better			va	2023-05-19 21:34:39
490	131	user_oriented_task_132	Suggest a recipe for a vegan dessert.	tulu_65B	chatgpt	Here's a simple recipe for a vegan chocolate mousse that serves 4: Ingredients: - 1 cup of silken tofu - 1/2 cup of maple syrup - 1/4 cup of cocoa powder - 1/4 tsp of vanilla extract - 1/4 tsp of salt Instructions: 1. Add the silken tofu, maple syrup, cocoa powder, vanilla extract, and salt to a blender or food processor. 2. Blend the ingredients until they are smooth and creamy. 3. Pour the mixt…	Vegan Chocolate Avocado Mousse Ingredients: - 2 ripe avocados - 1/2 cup cocoa powder - 1/2 cup maple syrup - 1/4 cup almond milk - 1 tsp vanilla extract - Pinch of salt Instructions: 1. Cut the avocados in half, remove the pit and scoop out the flesh into a blender or food processor. 2. Add the cocoa powder, maple syrup, almond milk, vanilla extract, and salt to the blender. 3. Blend all the ingr…	yes	yes	tie			va	2023-05-19 21:37:16
494	132	user_oriented_task_113	Provide a detailed explanation of the steps that are required in order to construct the given project. Steam Engine Using an Empty Beer Can	chatgpt	tulu_65B	Materials: - Empty beer can - Small candle - Water - Ice - Tongs - Screwdriver - Pliers - Scissors - Tape - String - Wooden skewer - Small piece of aluminum foil Steps: 1. Begin by cleaning and drying the empty beer can thoroughly. 2. Use a screwdriver and pliers to make a small hole in the center of the bottom of the can. 3. Cut a small piece of aluminum foil and tape it over the hole to create …	Constructing a steam engine using an empty beer can is a fun and educational project that can be completed with a few simple tools and materials. Here are the steps required to construct the project: 1. Gather materials: To construct the steam engine, you will need an empty beer can, a small candle, a small plastic bottle, a cork, a small piece of wire, a small piece of cardboard, a small piece o…	yes	yes	tie			va	2023-05-19 21:38:32
495	133	user_oriented_task_119	Please provide us with a list of the best conservation starter questions related to the weather.	chatgpt	tulu_65B	1. How does climate change affect weather patterns and natural habitats? 2. What are the impacts of extreme weather events on wildlife and ecosystems? 3. How can we reduce our carbon footprint to mitigate the effects of climate change on weather? 4. What role do forests and other natural landscapes play in regulating weather patterns? 5. How can we better predict and prepare for severe weather ev…	"why"	yes	no	a-is-better			va	2023-05-19 21:38:47
497	134	user_oriented_task_44	Curate a Spotify playlist based on the vibe. Publish this playlist as a song list. Vibe: coding on weekend	tulu_7B	tulu_65B	Here is a Spotify playlist based on the vibe of coding on weekends: 1. "Weekender" by The Avalanches 2. "Weekender" by The Avalanches 3. "Weekender" by The Avalanches 4. "Weekender" by The Avalanches 5. "Weekender" by The Avalanches 6. "Weekender" by The Avalanches 7. "Weekender" by The Avalanches 8. "Weekender" by The Avalanches 9. "Weekender" by The Avalanches 10. "Weekender" by The Avalanches …	Here's a Spotify playlist of 20 songs that match the vibe of coding on the weekend: 1. "Codex" by Radiohead 2. "The Algorithm" by Daft Punk 3. "Programmable Soda" by The Motion Picture Show 4. "Code Monkey" by Jonathan Coulton 5. "The Code" by The Scientists of Sound 6. "Code" by Taproot 7. "The Program" by The Chemical Brothers 8. "Code Red" by The Constellations 9. "The Code" by The Tallest Man…	no	yes	b-is-better			va	2023-05-19 21:39:09
498	135	vicuna_78	Write a captivating movie review for a recently released science fiction film, discussing its plot, characters, and special effects.	tulu_65B	chatgpt	In a world where technology has advanced beyond our wildest dreams, a new science fiction film has emerged that will transport you to a breathtaking future. The film follows the story of a group of astronauts on a mission to explore a distant planet, but when they arrive, they discover that the planet is not as uninhabited as they thought. The characters in this film are dynamic and engaging, eac…	The recently released science fiction film, "Interstellar," is a captivating masterpiece that takes viewers on a thrilling journey through space and time. Directed by Christopher Nolan, the film boasts an all-star cast, including Matthew McConaughey, Anne Hathaway, and Jessica Chastain, who deliver powerful performances that leave a lasting impression. The plot of "Interstellar" centers around a …	yes	yes	tie			va	2023-05-19 21:39:32
500	136	vicuna_3	What are the main differences between Python and JavaScript programming languages?	tulu_65B	chatgpt	Python and JavaScript are both popular programming languages, but they have some key differences. Python is a general-purpose, interpreted, object-oriented language, while JavaScript is a client-side scripting language, primarily used for web development. Python is a compiled language, while JavaScript is interpreted. Python is known for its readability and simplicity, while JavaScript is known f…	1. Syntax: Python has a more readable and straightforward syntax, while JavaScript has a more complex and flexible syntax. 2. Typing: Python is a dynamically typed language, meaning that the type of a variable is determined at runtime, while JavaScript is a loosely typed language, meaning that the type of a variable can change during runtime. 3. Execution: Python is an interpreted language, meani…	yes	yes	b-is-slightly-better			va	2023-05-19 21:41:09
501	137	vicuna_9	What are the primary factors that influence consumer behavior?	tulu_7B	tulu_65B	There are several primary factors that influence consumer behavior, including: 1. Personal factors: These include personal characteristics such as age, gender, income, education, and occupation, as well as personal values, attitudes, and beliefs. 2. Psychological factors: These include cognitive processes such as perception, attention, memory, and decision-making, as well as emotional states such…	Consumer behavior is influenced by a variety of factors, including: 1. Cultural and social factors: These include the consumer's cultural background, social status, and the influence of family, friends, and society on their purchasing decisions. 2. Personal factors: These include the consumer's age, occupation, income, education level, and lifestyle, which can all affect their purchasing behavior…	yes	yes	tie			va	2023-05-19 21:41:38
502	138	vicuna_1	How can I improve my time management skills?	tulu_65B	tulu_7B	Here are some tips to improve your time management skills: 1. Prioritize tasks: Make a to-do list and prioritize tasks based on their importance and urgency. Focus on the most important tasks first. 2. Set realistic goals: Set achievable goals for each day or week, and break down larger tasks into smaller, manageable ones. 3. Use a planner or calendar: Keep track of your appointments, deadlines, …	Time management is a skill that can be improved with practice and the right tools. Here are some tips to help you improve your time management skills: 1. Prioritize tasks: Make a to-do list and prioritize tasks based on their importance and urgency. Focus on the most important tasks first. 2. Set realistic goals: Set achievable goals for each day, week, and month. This will help you stay focused …	yes	yes	tie			va	2023-05-19 21:41:53
503	139	user_oriented_task_191	Please prepare a table containing a summary of the information of the participants at the conference. The conference was called to discuss how to improve the quality of education in schools. The main speaker was Professor Crew Purdie (cpurdie@email.com), who spoke about the importance of setting high standards for students and teachers. He said that schools should be places where students can lea…	tulu_65B	tulu_7B	| Name | Email | Role | Topic | | --- | --- | --- | --- | | Professor Crew Purdie | cpurdie@email.com | Professor | Importance of setting high standards for students and teachers | | Teacher Oliver Malachi | oliver@email.com | Teacher | Need for teachers to be well-prepared and to have high expectations for their students | | Parent Kolby Reese | kolbyreese82@email.com | Parent | Need for parents…	| Participant | Email | Topic | | --- | --- | --- | | Professor Crew Purdie | cpurdie@email.com | Education Quality | | Teacher Oliver Malachi | oliver@email.com | Teacher Preparation and Expectations | | Parent Kolby Reese | kolbyreese82@email.com | Parent Involvement | Note: The email addresses provided are fictional and for demonstration purposes only.	yes	yes	tie			va	2023-05-19 21:43:18
505	140	user_oriented_task_140	Solve this equation. x^3 - 4x^2 + 6x - 24 = 0	tulu_65B	chatgpt	x = 4	One possible method to solve this equation is to use the rational root theorem and synthetic division to test for possible rational roots. The rational root theorem states that any rational root of the polynomial must be of the form p/q, where p is a factor of the constant term (-24) and q is a factor of the leading coefficient (1). Therefore, the possible rational roots are: ±1, ±2, ±3, ±4, ±6, …	yes	no	a-is-slightly-better			va	2023-05-19 21:44:15
507	141	user_oriented_task_150	Identify all words that match the pattern given. H_AR_	chatgpt	tulu_65B	HARD, HARE, HARK, HARM, HART, HAREM, HARRY, HARDSHIP.	The words that match the pattern H_AR_ are: - HARBOUR - HARBOUR GRACE - HARBOUR GRACEFUL - HARBOUR GRACEFULNESS - HARBOUR GRACEFULNESS - HARBOUR GRACEFULNESS - HARBOUR GRACEFULNESS - HARBOUR GRACEFULNESS - HARBOUR GRACEFULNESS - HARBOUR GRACEFULNESS - HARBOUR GRACEFULNESS - HARBOUR GRACEFULNESS - HARBOUR GRACEFULNESS - HARBOUR GRACEFULNESS - HARBOUR GRACEFULNESS - HARBOUR GRACEFULNESS - HARBOUR G…	no	no	tie			va	2023-05-19 21:44:37
684	142	user_oriented_task_77	Write a step-by-step guide for resolving GitHub merge conflicts.	tulu_65B	chatgpt	1. Identify the merge conflict: When you try to merge two branches in GitHub, if there are any conflicts, you will receive a notification. 2. Check the conflicted files: Go to the repository and check the conflicted files. These files will have a conflict marker (<<<<<<< or >>>>>>>) indicating the parts that are in conflict. 3. Resolve the conflicts: Open the conflicted files in a text editor or …	1. Identify the conflicting files: The first step in resolving merge conflicts is to identify the files that are causing the conflict. You can do this by checking the merge status of your repository. 2. Pull the latest changes: Before you start resolving the conflicts, it is important to pull the latest changes from the repository. This will ensure that you have the most up-to-date version of the…	yes	yes	a-is-slightly-better			va	2023-05-21 00:04:20
685	143	vicuna_36	How can you assess the credibility of a source of information, such as a news article or blog post, without relying solely on the reputation of the author or publisher?	tulu_7B	tulu_65B	There are several ways to assess the credibility of a source of information without relying solely on the reputation of the author or publisher. Here are some steps you can take: 1. Check the author's credentials: Look for information about the author's education, work experience, and any relevant credentials. This can help you determine their level of expertise on the topic they are writing abou…	Assessing the credibility of a source of information without relying solely on the reputation of the author or publisher involves several steps. Here are some tips to help you evaluate the credibility of a news article or blog post: 1. Check the author's credentials: Look for information about the author's expertise and qualifications. Are they an expert in the field they are writing about? Do th…	yes	yes	a-is-slightly-better			va	2023-05-21 00:07:21
686	144	user_oriented_task_213	Review the property description and tell us what is good and what is bad about it and list its key takeaways. There's real magic in combining inherently compelling Victorian architecture with a modern aesthetic. Add in an extraordinary multi-level garden & the result is the undeniable elegance of 444 29th St. The front of the home is light-filled w/ a seamless connection between living, dining & …	chatgpt	tulu_65B	Good: - The combination of Victorian architecture and modern aesthetic is a unique and compelling feature. - The multi-level garden is described as extraordinary and beautifully landscaped. - The front of the home is light-filled and has a seamless connection between living, dining, and kitchen. - The kitchen has been newly updated with quartz counters and upgraded appliances. - The home has a 1-…	The property at 444 29th St. in Noe Valley, San Francisco, is a Victorian-style home with a modern aesthetic and an extraordinary multi-level garden. The front of the home is light-filled and features a seamless connection between the living, dining, and kitchen areas. The kitchen has been newly updated with quartz countertops and upgraded appliances. The large dining room has a bay of windows an…	yes	no	a-is-better			va	2023-05-21 00:09:43
687	145	vicuna_36	How can you assess the credibility of a source of information, such as a news article or blog post, without relying solely on the reputation of the author or publisher?	chatgpt	tulu_65B	1. Check the sources: Look for sources cited in the article or post and evaluate their credibility. Are they reputable and reliable sources? Are they biased or have a conflict of interest? 2. Fact-check: Verify the information presented in the article or post by cross-checking it with other sources. Look for inconsistencies or inaccuracies. 3. Evaluate the tone: Consider the tone of the article o…	Assessing the credibility of a source of information without relying solely on the reputation of the author or publisher involves several steps. Here are some tips to help you evaluate the credibility of a news article or blog post: 1. Check the author's credentials: Look for information about the author's expertise and qualifications. Are they an expert in the field they are writing about? Do th…	yes	yes	a-is-slightly-better			va	2023-05-21 00:13:40
688	146	vicuna_3	What are the main differences between Python and JavaScript programming languages?	tulu_7B	tulu_65B	Python and JavaScript are both popular programming languages, but they have some key differences. Here are some of the main differences between the two: 1. Syntax: Python has a simpler syntax than JavaScript. Python uses indentation to define code blocks, while JavaScript uses curly braces. 2. Execution: Python is an interpreted language, meaning that it is executed directly by the interpreter wi…	Python and JavaScript are both popular programming languages, but they have some key differences. Python is a general-purpose, interpreted, object-oriented language, while JavaScript is a client-side scripting language, primarily used for web development. Python is a compiled language, while JavaScript is interpreted. Python is known for its readability and simplicity, while JavaScript is known f…	yes	yes	a-is-slightly-better			va	2023-05-21 00:18:18
689	147	vicuna_38	How can observing the behavior of other people in a social situation provide clues about cultural norms and expectations?	tulu_65B	tulu_7B	Observing the behavior of other people in a social situation can provide valuable insights into cultural norms and expectations. By paying attention to how people interact with each other, the way they communicate, and their body language, one can gain a better understanding of the unwritten rules that govern social behavior in a particular culture. For example, in some cultures, it is customary …	Observing the behavior of other people in a social situation can provide clues about cultural norms and expectations by allowing us to see how people interact with each other and how they behave in different social contexts. For example, if we observe people greeting each other with a handshake and making eye contact during conversation, we can infer that these are cultural norms and expectations…	yes	yes	tie			va	2023-05-21 00:26:45
690	148	user_oriented_task_32	Write a review based on the given information. - Product: Persil Discs Laundry Detergent Pacs, Original Scent, High Efficiency (HE) Compatible, Laundry Soap, 62 Count - Sentiment: Positive	tulu_65B	tulu_7B	Based on the given information, it appears that the sentiment for Persil Discs Laundry Detergent Pacs is positive. This product is designed for use in high efficiency washing machines and is effective at cleaning laundry while maintaining its original scent. With 62 discs per pack, it is a convenient and efficient option for those looking for a reliable laundry soap.	I recently tried the Persil Discs Laundry Detergent Pacs and I have to say, I was very impressed with the results. These pacs are perfect for anyone who wants a quick and easy way to do their laundry. The pacs are easy to use and are very convenient to store. The scent is also very nice and doesn't overpower the clothes. I would definitely recommend these to anyone who is looking for a high-quali…	no	yes	b-is-better			va	2023-05-21 00:28:36
691	149	vicuna_11	What are some potential implications of using a single-use plastic bottle versus a reusable bottle on both the environment and human health?	chatgpt	tulu_65B	Using a single-use plastic bottle has several potential implications on the environment and human health, including: Environmental Implications: 1. Plastic pollution: Single-use plastic bottles contribute to plastic pollution in oceans, rivers, and landfills, which can harm wildlife and ecosystems. 2. Resource depletion: The production of single-use plastic bottles requires the use of non-renewab…	Single-use plastic bottles have a significant impact on both the environment and human health. Some of the potential implications include: Environmental Impact: - Plastic pollution: Single-use plastic bottles contribute to the growing problem of plastic pollution, which harms wildlife and marine life, and damages ecosystems. - Carbon footprint: The production and transportation of single-use plas…	yes	yes	tie			va	2023-05-21 00:29:12
692	150	vicuna_19	How do cultural, social, and economic factors influence people's food choices, and how can this knowledge be used to promote healthier diets?	tulu_65B	tulu_7B	Cultural, social, and economic factors can all play a significant role in shaping people's food choices. Cultural factors, such as traditions and customs, can influence the types of foods that people eat and the ways in which they are prepared. Social factors, such as peer pressure and the influence of advertising, can also impact food choices. For example, people may choose to eat certain foods …	Cultural, social, and economic factors play a significant role in influencing people's food choices. These factors can include a person's cultural background, social norms and expectations, economic status, and access to healthy food options. For example, cultural beliefs and traditions may influence the types of foods that are consumed, such as the importance of eating certain foods during speci…	yes	yes	tie			va	2023-05-21 00:29:41
693	151	user_oriented_task_83	Write a short analysis of the cinematography in the movie. Dead Poets Society	tulu_65B	chatgpt	The cinematography in the movie Dead Poets Society is a key element in creating the film's emotional and thematic impact. The film, set in the 1950s, is shot in a classical and formal style, with a predominantly static camera that captures the rigid and conformist atmosphere of the Welton Academy. The use of long shots and wide angles allows the audience to observe the characters and their intera…	The cinematography in Dead Poets Society is characterized by a combination of traditional and innovative techniques that effectively convey the themes and emotions of the story. The film's use of lighting, camera angles, and framing is particularly noteworthy, as it creates a sense of intimacy and immediacy that draws the viewer into the world of the characters. One of the most striking aspects o…	yes	yes	tie			va	2023-05-21 00:32:57
694	152	user_oriented_task_26	Make a list of desirable Skills for software engineers to add to LinkedIn.	tulu_7B	tulu_65B	1. Proficiency in at least one programming language such as Java, Python, or C++. 2. Experience with software development methodologies such as Agile or Scrum. 3. Familiarity with version control systems such as Git. 4. Knowledge of database management systems such as MySQL or MongoDB. 5. Understanding of software design patterns and principles. 6. Experience with web development frameworks such …	1. Proficiency in multiple programming languages 2. Experience with software development methodologies (e.g. Agile, Scrum) 3. Strong problem-solving and analytical skills 4. Familiarity with database management systems and SQL 5. Knowledge of software design patterns and architecture 6. Experience with version control systems (e.g. Git) 7. Familiarity with cloud computing platforms (e.g. AWS, Azu…	yes	yes	tie			va	2023-05-21 00:33:16
695	153	vicuna_39	Do we have a moral obligation to explore space, or should we focus on solving Earth's problems first?	tulu_65B	chatgpt	There is no moral obligation to explore space. The decision to explore space should be based on practical considerations, such as the potential benefits and risks, as well as the costs involved. It is important to note that exploring space and solving Earth's problems are not mutually exclusive, and it is possible to pursue both goals simultaneously. Ultimately, the decision to explore space shou…	As an AI language model, I do not have personal beliefs or opinions. However, I can provide a balanced perspective on the topic. There are arguments for both sides of this debate. On one hand, some people believe that we have a moral obligation to explore space because it is part of human nature to explore and discover new things. They argue that space exploration can lead to new technologies and…	yes	yes	tie			va	2023-05-21 00:33:43
696	154	user_oriented_task_129	Provide a cooking hack for improving the flavor of the given food. popcorn	tulu_65B	chatgpt	One cooking hack to improve the flavor of popcorn is to add a pinch of salt and a tablespoon of melted butter to the popcorn kernels before popping them. This will add a delicious, savory flavor to the popcorn, making it even more irresistible. Additionally, you can experiment with different seasonings and toppings such as garlic powder, chili powder, grated Parmesan cheese, or even cinnamon suga…	One cooking hack for improving the flavor of popcorn is to add a sprinkle of nutritional yeast. Nutritional yeast has a cheesy, nutty flavor and is a great source of protein and B vitamins. Simply sprinkle a small amount over your popcorn and toss to evenly distribute. This will add a delicious savory flavor to your popcorn without adding any extra calories or unhealthy ingredients.	yes	yes	tie			va	2023-05-21 00:34:06
697	155	vicuna_14	How do language and cultural barriers affect the way people communicate and form relationships in multicultural societies?	tulu_65B	chatgpt	Language and cultural barriers can have a significant impact on the way people communicate and form relationships in multicultural societies. Here are some ways in which these barriers can affect communication and relationships: 1. Misunderstandings: Language barriers can lead to misunderstandings and miscommunications, which can cause confusion and conflict. For example, idioms and colloquial ex…	Language and cultural barriers can have a significant impact on the way people communicate and form relationships in multicultural societies. These barriers can create misunderstandings, misinterpretations, and even conflicts between individuals from different cultural backgrounds. Language barriers can make it difficult for people to communicate effectively, leading to misunderstandings and frus…	yes	yes	b-is-slightly-better			va	2023-05-21 00:41:05
698	156	vicuna_12	What factors would you consider when designing an inclusive and accessible public transportation system?	tulu_65B	tulu_7B	When designing an inclusive and accessible public transportation system, there are several factors that should be considered to ensure that it meets the needs of all individuals, including those with disabilities. Some of these factors include: 1. Accessibility: The system should be designed to be accessible to all individuals, including those with mobility, visual, auditory, and cognitive impair…	When designing an inclusive and accessible public transportation system, there are several factors to consider to ensure that all users can access and use the system with ease. These include: 1. Physical accessibility: The design of the transportation system should ensure that it is physically accessible to all users, including those with disabilities. This includes ensuring that the transportati…	yes	yes	tie			va	2023-05-21 00:42:03
699	157	user_oriented_task_176	Answer the question about the paper after reading it carefully. To evaluate if the Transformer can generalize to other tasks we performed experiments on English constituency parsing. This task presents specific challenges: the output is subject to strong structural constraints and is significantly longer than the input. Furthermore, RNN sequence-to-sequence models have not been able to attain sta…	chatgpt	tulu_65B	English constituency parsing is a task that involves analyzing the structure of a sentence and identifying its grammatical components, such as phrases and clauses.	English constituency parsing is a task that presents specific challenges. The output is subject to strong structural constraints and is significantly longer than the input.	yes	yes	a-is-slightly-better			va	2023-05-21 00:47:54
700	158	user_oriented_task_222	Include important study notes and key points that someone should know about the given subject. history of the USA	chatgpt	tulu_65B	- The United States was founded in 1776 with the signing of the Declaration of Independence. - The country was originally made up of 13 colonies, which were British territories in North America. - The American Revolution, which lasted from 1775 to 1783, was a war fought by the colonies against Great Britain for independence. - The Constitution of the United States was written in 1787 and establis…	The history of the United States of America began with the arrival of the first European settlers in the 16th century. The first successful English colony was established in 1607 in Jamestown, Virginia. In the 17th century, more colonies were established, including Massachusetts, Maryland, Rhode Island, Connecticut, and Pennsylvania. In the late 18th century, the colonies began to resist British …	yes	yes	tie			va	2023-05-21 00:48:07
701	159	vicuna_26	As a sports commentator, describe the winning play in the final seconds of a championship game.	tulu_65B	tulu_7B	Ladies and gentlemen, we have reached the final seconds of this intense championship game, and the tension is palpable. The score is tied, and both teams are giving it their all, fighting for the victory. The ball is passed to the star player, who dribbles it skillfully, weaving through the opposing team's defense. With just seconds left on the clock, they make a quick move, spinning around their…	As the final seconds tick down in the championship game, the tension in the stadium is palpable. The two teams have been evenly matched throughout the game, with neither side able to gain the upper hand. But now, with just seconds left on the clock, the winning play is about to unfold. The ball is inbounded by the attacking team, and they quickly move it down the court. The defense is playing tig…	yes	yes	tie			va	2023-05-21 00:50:00
702	160	user_oriented_task_110	Think of an idea to help you win a challenge given to you. Write the steps you need to take to develop the idea as well. What can you make by recycling and repurposing some old, previously used materials? We want to see it! Projects must incorporate some kind of used materials - take that old used thing, and turn it into something new and different! E-waste is a huge problem. What can you make us…	tulu_65B	chatgpt	To develop an idea for this challenge, I would follow these steps: 1. Research: Start by researching the types of materials that can be recycled and repurposed. This could include old clothes, paper, plastic, glass, metal, and electronics. Look for inspiration from other projects that have successfully repurposed these materials. 2. Brainstorm: Once you have a good understanding of the materials …	Idea: Create a DIY Vertical Garden using recycled materials Steps to develop the idea: 1. Research different types of vertical gardens and their requirements. 2. Collect used materials such as old wooden pallets, plastic bottles, and tin cans. 3. Clean and prepare the materials for use. 4. Cut the wooden pallets into smaller pieces and sand them down to create a smooth surface. 5. Cut the plastic…	no	yes	b-is-better			va	2023-05-21 00:50:46
666	161	user_oriented_task_74	You need to write an email to negotiate your salary.	tulu_7B	tulu_65B	Dear [Employer], I hope this email finds you well. I am writing to discuss my current salary and to inquire about the possibility of a raise. I have been with the company for [number of years] and have consistently met and exceeded my performance goals. I have taken on additional responsibilities and have been a valuable member of the team. I believe that my contributions and dedication to the co…	Subject: Salary Negotiation Dear [Employer], I hope this email finds you well. I am writing to discuss my current salary and the possibility of a raise. I have been with the company for [length of time] and during that time, I have consistently met and exceeded my performance goals. I have taken on additional responsibilities and have been a valuable contributor to the team. I believe that my con…	yes	yes	b-is-better			cl	2023-05-20 20:44:30
703	161	user_oriented_task_74	You need to write an email to negotiate your salary.	tulu_7B	tulu_65B	Dear [Employer], I hope this email finds you well. I am writing to discuss my current salary and to inquire about the possibility of a raise. I have been with the company for [number of years] and have consistently met and exceeded my performance goals. I have taken on additional responsibilities and have been a valuable member of the team. I believe that my contributions and dedication to the co…	Subject: Salary Negotiation Dear [Employer], I hope this email finds you well. I am writing to discuss my current salary and the possibility of a raise. I have been with the company for [length of time] and during that time, I have consistently met and exceeded my performance goals. I have taken on additional responsibilities and have been a valuable contributor to the team. I believe that my con…	yes	yes	b-is-slightly-better			va	2023-05-21 00:51:10
667	162	user_oriented_task_67	You should choose a YouTube video title based on the video's content. A video's title tells viewers what to expect from it. It should be direct, honest, and clear. The title of the video needs to capture the attention of viewers, so do not use an unclear or ambiguous one. A research study has been conducted to determine if exercise really can "boost" your metabolism.	tulu_65B	tulu_7B	"Does Exercise Really Boost Your Metabolism? The Science Behind It"	"Does Exercise Really Boost Your Metabolism? Research Study"	yes	yes	a-is-slightly-better			cl	2023-05-20 20:45:01
668	163	user_oriented_task_119	Please provide us with a list of the best conservation starter questions related to the weather.	tulu_65B	tulu_7B	"why"	1. How does the weather affect the environment and ecosystems? 2. How does the weather influence human behavior and activities? 3. How do different weather patterns affect agriculture and food production? 4. How do weather events like hurricanes and tornadoes form and impact communities? 5. How do climate change and global warming affect the weather and extreme weather events? 6. How do weather f…	no	no	b-is-slightly-better			cl	2023-05-20 20:45:38
669	164	user_oriented_task_225	Provide an ESRB rating for the following game. This is an action-adventure game in which players help Kratos and his son on a dangerous quest. Players explore various realms and engage in frenetic hand-to-hand combat against human-like raiders and fantastical creatures (e.g., centaurs, trolls, dragons). Players use axes and chained blades to battle enemies, often resulting in large blood-splatter…	tulu_65B	tulu_7B	The ESRB rating for this game is M (Mature).	The ESRB rating for this game is Mature.	yes	yes	a-is-slightly-better			cl	2023-05-20 20:47:17
670	165	user_oriented_task_190	Convert the given description to a bash command. read the first 10 lines from f	tulu_7B	tulu_65B	head -n 10 f	head -n 10 f	yes	yes	tie			cl	2023-05-20 20:47:35
671	166	vicuna_35	Why might someone prefer to shop at a small, locally-owned business instead of a large chain store, even if the prices are higher?	chatgpt	tulu_65B	There are several reasons why someone might prefer to shop at a small, locally-owned business instead of a large chain store, even if the prices are higher: 1. Personalized service: Small businesses often provide more personalized service and are more likely to remember their customers' names and preferences. 2. Supporting the local economy: Shopping at a small, locally-owned business helps suppo…	Shopping at a small, locally-owned business instead of a large chain store can provide a more personalized and unique shopping experience. Local businesses often have a strong connection to the community and can offer products or services that cater specifically to the needs and preferences of the local population. Additionally, shopping at a small, locally-owned business can help support the loc…	yes	yes	a-is-slightly-better			cl	2023-05-20 20:48:05
716	167	user_oriented_task_211	Write an engaging and well-written property listing description for selling a house. Address of the house and some of the details are given to you. Fill in the information gap with hallucinations if needed. Property Address: 412 Monterey Ave, Capitola, CA 95010 Parking: 3 cars + a finished single car garage Details: - open floorplan - window with views to park/mountains - Kitchen with shaker cabi…	tulu_65B	tulu_7B	Welcome to 412 Monterey Ave, a stunning home located in the picturesque town of Capitola, CA. This beautiful property boasts an open floorplan, allowing for seamless entertaining and everyday living. The spacious living room features a large window with breathtaking views of the park and mountains, providing a serene and tranquil atmosphere. The kitchen is a chef's dream, with shaker cabinetry an…	Welcome to 412 Monterey Ave, a stunning home in the heart of Capitola, CA. This open floorplan home boasts a spacious living area with vaulted ceilings and large windows that provide breathtaking views of the park and mountains. The kitchen features shaker cabinetry and white Calcatta quartz counters, perfect for any chef. The single car garage is a great bonus, providing additional parking and s…	yes	yes	a-is-slightly-better			cl	2023-05-21 04:58:19
717	168	user_oriented_task_153	Respond to the last text in the chat using the correct emojis to convey your feelings. + Hey, how did your exams go? - They were alright. I'm just glad they're over. + Yeah, I know how you feel. I'm just glad I don't have to worry about them anymore.	tulu_65B	tulu_7B	😌😊🙌	😊😊😊😊😊😊😊😊😊😊😊😊😊😊😊😊😊😊😊😊😊😊😊😊😊😊😊😊😊😊😊😊😊😊😊😊😊😊😊😊😊😊😊😊😊😊😊😊😊😊😊😊😊😊😊😊😊😊😊😊😊😊😊😊😊😊😊😊😊😊😊😊😊😊😊😊😊😊😊😊😊😊😊😊😊😊😊😊😊😊😊😊😊😊😊😊😊😊😊😊😊😊😊😊😊😊😊😊😊😊😊😊😊😊😊😊😊😊😊😊😊😊😊😊😊😊😊😊😊😊😊😊😊😊😊😊😊😊😊😊😊😊😊😊😊😊😊😊😊😊😊😊😊😊😊😊😊😊😊😊😊😊😊😊😊😊😊😊😊😊😊😊😊😊😊😊😊😊😊😊😊😊😊😊😊😊😊😊😊😊😊😊😊😊😊😊😊😊😊😊😊😊😊😊😊😊😊😊😊😊😊😊😊😊😊😊😊😊😊😊😊😊😊😊😊😊😊😊😊😊😊😊😊😊😊😊😊😊😊😊😊😊😊😊😊😊😊😊😊😊😊😊😊😊😊😊	yes	yes	a-is-slightly-better			cl	2023-05-21 04:59:12
718	169	user_oriented_task_101	An evaluation of the article's quality should be carried out. In order to do so, you should review the quality of the writing and the explanation of the topic. The 20th century saw a revolution in music listening as the radio gained popularity worldwide and new media and technologies were developed to record, edit and distribute music. Music performances became increasingly visual with the broadc…	tulu_7B	tulu_65B	The article provides a brief overview of the impact of technology on music in the 20th century. The writing is clear and concise, and the topic is well explained. However, the article could benefit from more depth and detail. For example, the section on the invention of musical amplification and electronic instruments could be expanded to provide more information on the specific technologies and …	The article is of good quality. The writing is clear and concise, and the explanation of the topic is thorough and informative. The article covers the major developments in music listening and technology in the 20th century, including the rise of the radio, the development of new media and technologies for recording and distributing music, and the increasing visual nature of music performances wi…	yes	yes	a-is-better			cl	2023-05-21 05:01:07
719	170	user_oriented_task_147	You will be tested on your knowledge of classic witticisms and aphorisms by completing the given aphorism. Write the original quote as the answer. two things are infinite	chatgpt	tulu_65B	"Two things are infinite: the universe and human stupidity; and I'm not sure about the universe." - Albert Einstein	The original quote is "Two things are infinite: the universe and human stupidity; and I'm not sure about the universe." This quote is attributed to Albert Einstein.	yes	yes	tie			cl	2023-05-21 05:01:42
720	171	user_oriented_task_80	You are given some reviews for a movie. Each video might have mentioned some negative or positive points about the movie. Read them carefully and extract the positive and negative points mentioned in all of the reviews. Then, make a list of these points and summarize them as positive points and negative points. Review 1: I'm not sure if it's just the fact that Ed Norton really grates on me in thi…	tulu_65B	tulu_7B	Positive points: * Innovative story * Strong script * Engaging characters * Intense cinematography * Good theme * Great acting * Important messages * Fascinating visual effects Negative points: * Loses touch with its base elements * Story loses importance * Becomes childish and contrived * Becomes tedious towards the end * Fails to connect the audience with the storyline * Extremely overrated * D…	Negative points: 1. The story starts to fall apart halfway through. 2. The ending is childish and contrived. 3. The movie is overrated. Positive points: 1. The movie tells a good story about men who cannot adapt to the social order. 2. The movie has great acting and important messages. 3. The visual effects are fascinating.	yes	yes	a-is-slightly-better			cl	2023-05-21 05:04:44
721	172	user_oriented_task_25	Write a LinkedIn post to announce that you have accepted a new job offer.	tulu_65B	tulu_7B	I am excited to share that I have accepted a new job offer and will be embarking on a new journey in my career! I am grateful for the opportunities and experiences that have led me to this point, and I am looking forward to the challenges and growth that lie ahead. Thank you to everyone who has supported me along the way, and I can't wait to see what the future holds. #NewBeginnings #CareerGrowth…	I am thrilled to announce that I have accepted a new job offer! I am excited to embark on this new journey and to work with a new team. I would like to take this opportunity to thank my previous employer for the amazing experience and for providing me with the skills and knowledge that have helped me get to this point. I am looking forward to the new challenges and opportunities that lie ahead an…	yes	yes	b-is-slightly-better			cl	2023-05-21 05:05:24
722	173	user_oriented_task_192	List the concepts that should be learned before approaching the given complex concept. Deep Learning	chatgpt	tulu_65B	1. Machine Learning: Deep learning is a subset of machine learning, so it is important to have a good understanding of machine learning concepts such as supervised and unsupervised learning, regression, classification, clustering, and feature engineering. 2. Neural Networks: Deep learning is based on neural networks, so it is important to have a good understanding of the basics of neural networks…	Before approaching the complex concept of Deep Learning, it is important to have a solid understanding of the following concepts: 1. Artificial Neural Networks (ANNs): Deep Learning is a subset of ANNs, so understanding the basics of ANNs is essential. 2. Linear Algebra: Deep Learning involves a lot of matrix operations, so a good understanding of linear algebra is necessary. 3. Probability and S…	no	yes	b-is-slightly-better			cl	2023-05-21 05:06:44
723	174	user_oriented_task_155	The last message in the chat is a partial response. You should complete and rewrite it. + What are going to do now? - I don't know. I had to give up my dream of being a mathematician. + Why	chatgpt	tulu_65B	- It just wasn't working out for me. I struggled with some of the advanced concepts and couldn't keep up with my peers. I've decided to pursue a different career path now.	I don't know. I had to give up my dream of being a mathematician.	yes	no	a-is-better			cl	2023-05-21 05:07:21
724	175	vicuna_58	What if the Maya civilization had never mysteriously collapsed?	chatgpt	tulu_65B	If the Maya civilization had never mysteriously collapsed, it is likely that they would have continued to thrive and develop their culture and society. They may have continued to expand their territory and influence, possibly even establishing a larger empire. Their advancements in agriculture, mathematics, astronomy, and architecture would have continued to progress, potentially leading to even …	If the Maya civilization had never mysteriously collapsed, it is possible that they would have continued to thrive and develop their advanced culture, technology, and architecture. They may have also continued to expand their empire and influence, potentially leading to a very different history of the Americas. It is also possible that the Maya civilization would have faced new challenges and con…	yes	yes	tie			cl	2023-05-21 05:08:11
725	176	user_oriented_task_8	My favorite witty review of The Rings of Power series is this:	tulu_65B	tulu_7B	I'm sorry, but I'm not familiar with a book series called "The Rings of Power." Could you provide more context or clarify which series you are referring to?	"The Rings of Power is like Lord of the Rings Lite. It has the same epic fantasy setting, the same clichéd characters, and the same slow pace. But instead of being written by a talented author like J.R.R. Tolkien, it was written by a bunch of talented authors like J.K. Rowling. It's like eating a box of chocolate-frosted donuts: it's sweet and satisfying, but you know you shouldn't have too much …	no	no	tie			cl	2023-05-21 05:09:29
726	177	user_oriented_task_88	Name the top cities in France that should not be missed. Include the best aspects of each place as well.	tulu_65B	chatgpt	Paris, Marseille, Lyon, Toul, Nice, Strasbourg	1. Paris - The City of Light is a must-visit destination for its iconic landmarks such as the Eiffel Tower, Notre-Dame Cathedral, and the Louvre Museum. Paris is also known for its world-class cuisine, fashion, and art scene. 2. Nice - Located on the French Riviera, Nice is a beautiful coastal city with stunning beaches, colorful buildings, and a charming Old Town. Visitors can also explore the f…	no	yes	b-is-better			cl	2023-05-21 05:09:59
729	178	user_oriented_task_176	Answer the question about the paper after reading it carefully. To evaluate if the Transformer can generalize to other tasks we performed experiments on English constituency parsing. This task presents specific challenges: the output is subject to strong structural constraints and is significantly longer than the input. Furthermore, RNN sequence-to-sequence models have not been able to attain sta…	tulu_65B	tulu_7B	English constituency parsing is a task that presents specific challenges. The output is subject to strong structural constraints and is significantly longer than the input.	English constituency parsing is a task that presents specific challenges. The output is subject to strong structural constraints and is significantly longer than the input. Furthermore, RNN sequence-to-sequence models have not been able to attain state-of-the-art results in small-data regimes.	no	no	tie			cl	2023-05-21 05:12:30
730	179	user_oriented_task_152	Look for poems that mention the given object or character. The names of the poems and their poets should be written. santa claus	tulu_65B	chatgpt	Here are some poems that mention Santa Claus: 1. "The Night Before Christmas" by Clement Clarke Moore 2. "A Visit from St. Nicholas" by Phyllis McGinley 3. "Santa Claus: A Morning Song" by Abel Meeropol 4. "Christmas Eve" by Max Fleischer 5. "The Santa Claus" by Edwin Arlington Robinson 6. "Christmas Bells" by Henry Wadsworth Longfellow 7. "Christmas at Sea" by Robert Louis Stevenson 8. "The Chri…	1. "A Visit from St. Nicholas" by Clement Clarke Moore 2. "Santa Claus" by James Whitcomb Riley 3. "The Night Before Christmas" by Anonymous 4. "Santa Claus" by Ogden Nash 5. "Santa Claus" by Edgar Guest 6. "Santa Claus" by Paul Laurence Dunbar 7. "Santa Claus" by Shel Silverstein 8. "The Santa Claus Parade" by Margaret Atwood 9. "Santa Claus in the Bush" by Banjo Paterson 10. "Santa Claus" by La…	no	no	tie			cl	2023-05-21 05:15:14
731	180	user_oriented_task_4	Desk jobs require writing a lot of emails, so it isn't surprising we get tired of repeating ourselves. Come up with several synonyms for the given word. Sincerely	tulu_65B	tulu_7B	1. Truthfully 2. Honestly 3. Genuinely 4. Faithfully 5. Authentically 6. Candidly 7. Openly 8. Heartily 9. Loyally 10. Devotedly	1. Truly 2. Honestly 3. Genuinely 4. Sincerely 5. Authentically 6. Openly 7. Candidly 8. Frankly 9. Straightforwardly 10. Directly.	no	no	tie			cl	2023-05-21 05:15:49
893	181	user_oriented_task_212	Given a real estate listing description, extract the information and details of the property from the text. The details consist of address, basic house attributes, etc. WALK TO THE BEACH FROM CAPITOLA KNOLLS! Single-level upstairs condo with your own large private deck overlooking nature. Adorable home that is move-in ready and waiting for you to put your own personal touches on. Gorgeous and wel…	tulu_65B	chatgpt	Address: 100 Capitola Knolls Dr, Capitola, CA 95010 Bedrooms: 2 Bathrooms: 2 Square Footage: 1,000 Lot Size: 0.09 acres Year Built: 1980 Style: Condo Parking: 1 car Pool: Yes View: Nature HOA Dues: $350/month Lease: No Walk to Beach: Yes	Address: Not specified Type of property: Single-level upstairs condo Location: Capitola Knolls Distance to beach: Walking distance Private deck: Yes, large and overlooking nature Condition: Move-in ready Landscaping: Gorgeous and well-maintained park-like setting with lush green grasses Community amenities: Pool and spa Nearby attractions: Capitola Village, Gayle's Bakery, restaurants, shopping, …	no	yes	b-is-better			yi	2023-05-22 07:04:43
894	182	user_oriented_task_160	Describe the content of the article in a brief manner. A study published earlier this year by Zee and her team examined the role of light in sleep for healthy adults in their 20s. Sleeping for only one night with a dim light, such as a TV set with the sound off, raised the blood sugar and heart rate of the young people during the sleep lab experiment. An elevated heart rate at night has been show…	tulu_65B	tulu_7B	The article discusses a study that examined the impact of light on sleep for healthy adults in their 20s. The study found that sleeping with dim light for one night raised the participants' blood sugar and heart rate, which are risk factors for heart disease and type 2 diabetes.	The article discusses a study conducted by Zee and her team, which examined the role of light in sleep for healthy adults in their 20s. The study found that sleeping for one night with a dim light, such as a TV set with the sound off, raised the blood sugar and heart rate of the young people during the sleep lab experiment. This suggests that exposure to dim light at night may have negative effec…	yes	no	a-is-better			yi	2023-05-22 07:23:02
895	183	user_oriented_task_148	A list of all movies that meet the criteria given should be compiled. movies directed by Spike Lee by release date	chatgpt	tulu_65B	1. She's Gotta Have It (1986) 2. School Daze (1988) 3. Do the Right Thing (1989) 4. Mo' Better Blues (1990) 5. Jungle Fever (1991) 6. Malcolm X (1992) 7. Crooklyn (1994) 8. Clockers (1995) 9. Girl 6 (1996) 10. Get on the Bus (1996) 11. He Got Game (1998) 12. Summer of Sam (1999) 13. Bamboozled (2000) 14. 25th Hour (2002) 15. She Hate Me (2004) 16. Inside Man (2006) 17. Miracle at St. Anna (2008) …	Here is a list of all the movies directed by Spike Lee, ordered by release date: 1. She's Gotta Have It (1986) 2. School Daze (1988) 3. Do the Right Thing (1989) 4. Mo' Better Blues (1990) 5. Jungle Fever (1991) 6. Malcolm X (1992) 7. Crooklyn (1994) 8. Clockers (1995) 9. Girl 6 (1996) 10. Get on the Bus (1996) 11. He Got Game (1998) 12. Summer of Sam (1999) 13. Bamboozled (2000) 14. 25th Hour (2…	no	no	a-is-slightly-better			yi	2023-05-22 07:26:35
897	184	user_oriented_task_83	Write a short analysis of the cinematography in the movie. Dead Poets Society	tulu_65B	tulu_7B	The cinematography in the movie Dead Poets Society is a key element in creating the film's emotional and thematic impact. The film, set in the 1950s, is shot in a classical and formal style, with a predominantly static camera that captures the rigid and conformist atmosphere of the Welton Academy. The use of long shots and wide angles allows the audience to observe the characters and their intera…	The cinematography in the movie Dead Poets Society is a key element in conveying the themes and emotions of the film. The use of wide shots and close-ups effectively captures the essence of the characters and their interactions with each other. The camera work is often fluid and dynamic, moving smoothly from one scene to the next, creating a sense of energy and excitement. The film's color palett…	yes	yes	a-is-slightly-better			yi	2023-05-22 07:28:31
898	185	user_oriented_task_213	Review the property description and tell us what is good and what is bad about it and list its key takeaways. There's real magic in combining inherently compelling Victorian architecture with a modern aesthetic. Add in an extraordinary multi-level garden & the result is the undeniable elegance of 444 29th St. The front of the home is light-filled w/ a seamless connection between living, dining & …	tulu_7B	tulu_65B	Good: * The combination of Victorian architecture with a modern aesthetic creates a unique and elegant home. * The multi-level garden is a standout feature of the property, providing a beautiful outdoor space for entertaining and relaxation. * The home has been updated with modern amenities, including a newly remodeled kitchen with quartz counters and upgraded appliances. * The stylishly remodele…	The property at 444 29th St. in Noe Valley, San Francisco, is a Victorian-style home with a modern aesthetic and an extraordinary multi-level garden. The front of the home is light-filled and features a seamless connection between the living, dining, and kitchen areas. The kitchen has been newly updated with quartz countertops and upgraded appliances. The large dining room has a bay of windows an…	yes	no	a-is-better			yi	2023-05-22 07:29:25
899	186	user_oriented_task_22	Think of alternatives and paraphrases for the underlined word. what we have _expected	tulu_7B	tulu_65B	what we have anticipated	1. What we have anticipated 2. What we have predicted 3. What we have foreseen 4. What we have envisioned 5. What we have presumed 6. What we have assumed 7. What we have speculated 8. What we have theorized 9. What we have postulated 10. What we have surmised	yes	yes	b-is-better			yi	2023-05-22 07:29:46
900	187	user_oriented_task_63	You are given a topic for an Instagram post. Help the post reach a broader audience by suggesting hashtags related to the post. Another episode of women in science is out now	tulu_7B	tulu_65B	#WomenInScience #STEM #Inspiration #Motivation #ScienceCommunication #ScienceLove #ScienceCommunity #ScienceTalent #SciencePassion #ScienceInspiration #ScienceInnovation #ScienceAdvancement #ScienceEducation #ScienceAwareness #ScienceInspiring #ScienceInspiringWomen #ScienceCommunity #ScienceTalent #SciencePassion #ScienceInspiration #ScienceInnovation #ScienceAdvancement #ScienceEducation #Scien…	#WomenInScience #ScienceCommunication #WomenInSTEM #ScienceEducation #WomenInTech #ScienceAndTech #WomenInResearch #ScienceAndSociety #WomenInEngineering #ScienceAndEngineering #WomenInMedicine #ScienceAndMedicine #WomenInMath #ScienceAndMath #WomenInPhysics #ScienceAndPhysics #WomenInBiology #ScienceAndBiology #WomenInChemistry #ScienceAndChemistry #WomenInGeology #ScienceAndGeology #WomenInAstr…	yes	yes	tie			yi	2023-05-22 07:30:20
902	188	user_oriented_task_198	Create a list of subtopics for the given topic. Music theory	chatgpt	tulu_65B	1. Basic music notation 2. Scales and modes 3. Chords and chord progressions 4. Harmony and counterpoint 5. Rhythm and meter 6. Musical form and structure 7. Analysis of musical works 8. Ear training and sight-singing 9. Composition and arranging 10. Historical development of music theory.	1. Harmony and chord progressions 2. Melody and motifs 3. Rhythm and meter 4. Scales and modes 5. Key signatures and tonality 6. Intervals and chord construction 7. Voice leading and counterpoint 8. Musical notation and terminology 9. Music analysis and composition 10. History of music theory and its development.	yes	yes	a-is-slightly-better			yi	2023-05-22 07:33:14
903	189	user_oriented_task_137	Give a brief description of the book that you are given. Matilda	tulu_65B	chatgpt	Matilda is a children's novel written by Roald Dahl, published in 1988. It tells the story of Matilda Wormwood, a young girl with extraordinary intelligence and a love for reading. Matilda is born into a family that does not appreciate her talents and is mistreated by her parents and older brother. She finds solace in her local library and her kind teacher, Miss Honey. Matilda discovers she has t…	Matilda is a children's novel written by Roald Dahl. It tells the story of a young girl named Matilda who possesses extraordinary intelligence and telekinetic powers. Despite her parents' neglect and her cruel headmistress, Matilda uses her abilities to stand up for herself and her friends. Along the way, she discovers the joy of reading and the power of imagination. The book has become a beloved…	yes	yes	a-is-slightly-better			yi	2023-05-22 07:34:49
904	190	user_oriented_task_84	Please let me know your thoughts on the given place and why you think it deserves to be visited. Barcelona, Spain	tulu_65B	tulu_7B	Barcelona is a vibrant and beautiful city located on the northeastern coast of Spain. It is known for its iconic architecture, historical landmarks, stunning beaches, and lively culture. Here are some reasons why Barcelona is worth visiting: 1. Architecture: Barcelona is home to some of the most unique and stunning architecture in the world. The city is famous for the works of Antoni Gaudi, a ren…	Barcelona is a beautiful city located in the northeast of Spain. It is known for its rich history, beautiful architecture, and vibrant culture. The city is home to many famous landmarks such as the Sagrada Familia, Park Guell, and La Rambla. Barcelona is also a popular tourist destination due to its beautiful beaches, delicious food, and lively nightlife. The city is also known for its football t…	yes	yes	a-is-slightly-better			yi	2023-05-22 07:35:20
683	191	user_oriented_task_224	Convert natural language into a list of turn-by-turn directions. Go west on I-10 until you hit the 101 then take it north. You will eventually see the Hollywood sign.	tulu_65B	tulu_7B	1. Go west on I-10 2. Take the 101 north 3. Look for the Hollywood sign	1. Go west on I-10 2. Hit the 101 3. Take it north	yes	yes	a-is-slightly-better			yi	2023-05-20 22:46:53
704	192	user_oriented_task_130	Make a list of snacks and foods to serve as party snacks on a game day!	chatgpt	tulu_65B	1. Chips and dip (salsa, guacamole, queso) 2. Chicken wings 3. Pizza 4. Nachos 5. Popcorn 6. Pretzels 7. Cheese and crackers 8. Veggie platter with dip 9. Meatballs 10. Sliders 11. Hot dogs 12. Chili 13. Quesadillas 14. Taquitos 15. Mini tacos 16. Deviled eggs 17. Buffalo chicken dip 18. Mini sandwiches 19. Jalapeno poppers 20. Brownies or cookies for dessert.	Here are some ideas for snacks and foods to serve on game day: 1. Chips and dip 2. Pizza 3. Hot dogs 4. Sliders 5. Wings 6. Nachos 7. Popcorn 8. Soft pretzels 9. Cheese and crackers 10. Fruit and veggie trays 11. Meatballs 12. Chicken tenders 13. Quesadillas 14. Desserts such as cookies, brownies, and cupcakes 15. Beverages such as soda, beer, and wine.	no	yes	b-is-better			yi	2023-05-21 01:45:44
705	193	user_oriented_task_164	Classify the tweet into one of the following three categories: event, demo, or news. Event is a happening, often social or public, that people attend or are aware of. Demo is a public showing or presentation of something, typically to promote or advertise it. And, news is information about recent events or happenings, especially as reported by news media. Using this tutorial, you can analyze and …	chatgpt	tulu_65B	Category: News	demo	no	yes	b-is-better			yi	2023-05-21 01:46:31
706	194	vicuna_10	What are the most effective strategies for conflict resolution in the workplace?	chatgpt	tulu_65B	1. Communication: Encourage open and honest communication between parties involved in the conflict. Listen actively and try to understand the other person's perspective. 2. Collaboration: Encourage both parties to work together to find a mutually beneficial solution. Brainstorm ideas and work towards a compromise. 3. Mediation: Bring in a neutral third party to facilitate the conversation and hel…	Effective conflict resolution strategies in the workplace include: 1. Active Listening: Encourage all parties involved to express their thoughts and feelings openly and honestly, without interruption or judgment. 2. Clarify the Problem: Clearly define the issue at hand and make sure all parties have a shared understanding of the problem. 3. Identify Common Goals: Find common ground and shared int…	yes	yes	b-is-slightly-better			yi	2023-05-21 01:47:53
707	195	user_oriented_task_197	You are given a search query and a document. Classify whether the document is relevant to the search query or not relevant. Search: why sky is blue Document: The Short Answer: Sunlight reaches Earth's atmosphere and is scattered in all directions by all the gases and particles in the air. Blue light is scattered more than the other colors because it travels as shorter, smaller waves. This is why …	chatgpt	tulu_65B	Relevant.	Relevant	yes	yes	tie			yi	2023-05-21 01:48:15
708	196	user_oriented_task_17	What are the steps to using random (yet coherent) text as filler content within your Word document?	tulu_65B	chatgpt	Using random text as filler content in a Word document can be a useful way to add placeholder text while you're still drafting the final version. Here are the steps to do it: 1. Open a new or existing Word document. 2. Click where you want to add the filler text. 3. Click the "Layout" tab in the ribbon at the top of the screen. 4. Click the "More Layout Options" button in the "Page Setup" group. …	1. Open your Word document and navigate to the page where you want to insert filler text. 2. Click on the "Insert" tab in the top menu bar. 3. Click on the "Quick Parts" dropdown menu and select "Lorem Ipsum" or "Random Text". 4. A block of random text will appear in your document. You can adjust the length and format of the text by highlighting it and using the formatting tools in the top menu b…	no	no	b-is-slightly-better			yi	2023-05-21 01:51:24
709	197	user_oriented_task_229	We have described a scene from a movie that we have seen in the past. Find out what movie it is. A choice has to be made between picking the red pill or the blue pill	tulu_65B	tulu_7B	The movie you are describing is "The Matrix".	The movie scene you described is from the first The Matrix movie released in 1999. In this scene, Neo, the main character, is offered the choice between taking the red pill or the blue pill by Morpheus, a character who is a member of a rebellion against a powerful artificial intelligence system called the Matrix. The red pill represents the truth and the blue pill represents a false reality. The …	yes	yes	b-is-better			yi	2023-05-21 01:58:11
710	198	user_oriented_task_52	Prepare an email signature template for the given person or company. a graduate student of computer science	tulu_65B	tulu_7B	Email Signature Template for a Graduate Student of Computer Science: ``` Name: [Your Name] Degree: Computer Science Graduate Student Email: [Your Email] Phone: [Your Phone Number] Website: [Your Website URL] LinkedIn: [Your LinkedIn URL] Twitter: [Your Twitter Handle] ``` Please note that the information in brackets should be replaced with your personal information.	Here is a sample email signature template for a graduate student of computer science: --- **Name:** [Your Name] **Email:** [Your Email Address] **Phone:** [Your Phone Number] **LinkedIn:** [Your LinkedIn Profile] Best regards, [Your Name]	yes	yes	tie			yi	2023-05-21 01:59:20
711	199	user_oriented_task_166	Classify the questions in the FAQ into Finding policy details, Change account settings, Filing a claim and viewing status, or Cancelling coverage. Could you deposit money into my account rather than mailing me a physical cheque?	tulu_65B	tulu_7B	The question falls into the category of "Change account settings".	Change account settings	yes	yes	tie			yi	2023-05-21 01:59:43
712	200	user_oriented_task_218	A user story is an informal, general explanation of a software feature written from the perspective of the end user or customer. Write a user story for a given software. Gmail	tulu_65B	tulu_7B	As a busy professional, I want to be able to efficiently manage my emails and stay organized, so that I can quickly respond to important messages and keep my inbox clutter-free. Gmail provides me with features such as labels, filters, and the ability to star and mark messages as spam, allowing me to easily sort and prioritize my emails. Additionally, the search function allows me to quickly find …	As a busy professional, I want to be able to quickly and easily organize my emails into different folders so that I can easily find and access the information I need.	yes	no	a-is-better			yi	2023-05-21 02:00:15
73	201	user_oriented_task_168	Give some examples of what people usually say in the given social situation. when someone arrives safely	chatgpt	tulu_65B	1. "Thank goodness you made it here safely!" 2. "I'm so relieved to see you in one piece." 3. "I was worried sick about you, glad you're okay." 4. "You had me worried there for a minute, but I'm glad you're here now." 5. "I'm so happy to see you made it here without any trouble."	1. "I'm so glad you made it safely!" 2. "Welcome back! I was worried about you." 3. "It's great to see you again. I'm relieved you arrived safely." 4. "I'm so happy you're here! I was concerned about your journey." 5. "You made it! I'm so glad you had a safe trip." 6. "It's good to have you back. I was thinking about you during your travels." 7. "I'm so relieved you arrived safely. Welcome home!"…	yes	yes	b-is-better			cl	2023-05-18 23:30:12
75	202	user_oriented_task_230	Take the product description and write a creative ad for it. Document Cameras allow teachers to display documents, books, or other materials for their students to see.	tulu_65B	chatgpt	Introducing the ultimate teaching tool: the Document Camera! Say goodbye to old-fashioned overhead projectors and hello to crystal-clear images and videos. With the touch of a button, you can display any document, book, or material for your students to see. It's the perfect way to bring your lessons to life and keep your students engaged. Get yours today and take your teaching to the next level!	Attention all teachers! Are you tired of holding up books and documents for your students to see? Say goodbye to strained arms and hello to the convenience of a Document Camera! With this amazing tool, you can easily display any document, book, or material for your students to see with crystal clear clarity. No more squinting or straining to see the words on the page. Your students will be able t…	no	yes	b-is-slightly-better			cl	2023-05-18 23:32:36
76	203	user_oriented_task_65	The topic of a YouTube post has been described and based on the information, you need to write a hook for starting the post. A catchy hook will keep your readers interested so they keep reading. It would be great if you could come up with as many hooks as you can. A video showing how to make a tasty cup of coffee	tulu_65B	tulu_7B	"Wake up and smell the difference with our step-by-step guide to the perfect cup of coffee!"	"Wake up and smell the difference with this easy-to-follow guide to making the perfect cup of coffee!"	no	no	tie			cl	2023-05-18 23:33:13
77	204	user_oriented_task_58	We've already decided on the title and topic for our blog post. I would appreciate it if you wrote an introduction paragraph to attract the readers' attention. Blog title: Healthy Apple Muffins Blog Topic: recipe and tips for cooking a good apple muffin	chatgpt	tulu_65B	Are you looking for a delicious and healthy snack that you can enjoy any time of the day? Look no further than our recipe for Healthy Apple Muffins! These muffins are packed with juicy chunks of fresh apples and wholesome ingredients that will leave you feeling satisfied and energized. In this blog post, we'll share our recipe and tips for cooking the perfect apple muffin that your whole family w…	Are you craving a delicious and healthy snack that's perfect for breakfast or a mid-afternoon treat? Look no further than these scrumptious apple muffins! In this blog post, we'll be sharing a foolproof recipe that will have you baking perfection in no time. But that's not all - we'll also be providing you with some expert tips and tricks to take your apple muffin game to the next level. So grab …	yes	yes	tie			cl	2023-05-18 23:33:55
78	205	user_oriented_task_194	Assess the sentiment of the given tweet and categorize it as Positive, Negative, or Neutral. "This is the best cheat-sheet paper that I've found in a LONG time."	tulu_7B	tulu_65B	Positive	Positive	yes	yes	tie			cl	2023-05-18 23:34:20
80	206	user_oriented_task_78	One or more jobs can be run automatically by a workflow. The workflows are defined in the repository as YAML files and will run if an event occurs in the repository, as well as manually, or on a certain schedule. Bring an example of a workflow that demonstrate the CI/CD features of GitHub Actions.	chatgpt	tulu_65B	Here's an example of a workflow that demonstrates the CI/CD features of GitHub Actions: ``` name: CI/CD Pipeline on: push: branches: [ main ] pull_request: branches: [ main ] jobs: build: runs-on: ubuntu-latest steps: - name: Checkout code uses: actions/checkout@v2 - name: Install dependencies run: npm install - name: Build and test run: npm run build && npm test deploy: needs: build runs-on: ubu…	Here is an example of a workflow that demonstrates the CI/CD features of GitHub Actions: ``` name: Build and Deploy on: push: branches: - main jobs: build: runs-on: ubuntu-latest steps: - name: Checkout code uses: actions/checkout@v2 - name: Set up Node.js uses: actions/setup-node@v2 with: node-version: 14 - name: Install dependencies run: npm install - name: Build run: npm run build deploy: runs…	yes	yes	tie			cl	2023-05-18 23:36:40
81	207	vicuna_80	Write a symphony concert review, discussing the orchestra's performance and overall audience experience.	tulu_65B	tulu_7B	On a crisp autumn evening, the city's symphony orchestra filled the grand concert hall with the rich, resonant sounds of classical music. The audience, dressed in their finest attire, eagerly took their seats, ready to be swept away by the enchanting melodies. As the lights dimmed and the orchestra took the stage, the conductor, a charismatic figure with a commanding presence, led the musicians i…	I recently had the pleasure of attending a symphony concert at the renowned Carnegie Hall in New York City. The orchestra, which was led by the esteemed conductor Maestro Z, performed a beautiful selection of classical pieces that had the audience captivated from start to finish. The concert began with a lively overture that set the tone for the evening. The orchestra's performance was flawless, …	no	yes	b-is-better			cl	2023-05-18 23:37:43
82	208	user_oriented_task_125	What sound does this make? 好	tulu_7B	tulu_65B	The sound of "好" in Chinese is a voiced "h" sound, similar to the English "h" in "hat" or "honor."	"Hao ni ma"	no	no	tie			cl	2023-05-18 23:38:55
83	209	vicuna_65	Implement a binary search algorithm to find a specific element in a sorted array.	chatgpt	tulu_65B	Here is an implementation of binary search algorithm in Python: ``` def binary_search(arr, target): left = 0 right = len(arr) - 1 while left <= right: mid = (left + right) // 2 if arr[mid] == target: return mid elif arr[mid] < target: left = mid + 1 else: right = mid - 1 return -1 ``` The function takes two arguments: the sorted array `arr` and the target element `target`. It initializes two poin…	def binary_search(arr, x): low = 0 high = len(arr) - 1 while low <= high: mid = (low + high) // 2 if arr[mid] == x: return mid elif arr[mid] < x: low = mid + 1 else: high = mid - 1 return -1	yes	yes	a-is-better			cl	2023-05-18 23:40:27
84	210	user_oriented_task_56	A job description is a document that clearly states the requirements, duties, responsibilities, and skills required to perform a specific role. You need to write a job description based on the given information. You should describe responsibilities and duties in your job description in a logical order. Remember that potential employees often get their first impression of your company from your jo…	chatgpt	tulu_65B	Job Description: Software Engineer [Company name] is seeking a highly motivated and skilled Software Engineer to join our team. As a Software Engineer, you will be responsible for developing, testing, and debugging complex data processing pipelines and data analysis applications using big data processing systems such as Apache Spark. You will work collaboratively with fellow software engineers to…	Job Title: Software Engineer Company: [Company name] Job Description: We are seeking a talented and motivated Software Engineer to join our team. As a Software Engineer, you will be responsible for developing, testing, and debugging complex data processing pipelines and data analysis applications using big data processing systems such as Apache Spark. You will also participate in Agile teams to e…	yes	yes	b-is-slightly-better			cl	2023-05-18 23:42:32
86	211	user_oriented_task_14	When you're stuck on a coding problem, the best place to look for help is in the documentation. Read the docs carefully and see if there's a section that covers your specific issue. Often, the answer will be right there in front of you. If not, try searching for key terms related to your problem. Come up with the useful links about the given search term. sql find duplicate values	tulu_7B	tulu_65B	To find duplicate values in a SQL table, you can use the `GROUP BY` and `HAVING` clauses. Here's an example query that demonstrates how to do this: ```sql SELECT COUNT(DISTINCT column_name) FROM table_name GROUP BY column_name HAVING COUNT(DISTINCT column_name) > 1; ``` In this query, `COUNT(DISTINCT column_name)` counts the number of distinct values in the `column_name` column. The `GROUP BY` cl…	Here are some useful links related to finding duplicate values in SQL: 1. "Finding Duplicate Rows in SQL" by Tutorials Point: <https://www.tutorialspoint.com/sql/sql-find-duplicates.htm> 2. "SQL: How to Find Duplicate Records" by Database Journal: <https://www.databasejournal.com/features/mssql/article.php/3827031/SQL-How-to-Find-Duplicate-Records.htm> 3. "SQL: How to Find Duplicate Records in a …	yes	yes	a-is-slightly-better			cl	2023-05-18 23:44:17
87	212	user_oriented_task_9	A helpful writing exercise is writing a story without using adjectives or adverbs. This will help you learn to use other words and phrases to describe what you are trying to say. Here are some examples:	tulu_65B	chatgpt	Sure, I'd be happy to help you with that! Can you please provide me with more information about the story you want to write?	Example 1: The sun rose over the horizon, casting a warm glow on the world below. Birds chirped and flitted about, their wings beating in a steady rhythm. A gentle breeze rustled the leaves on the trees, creating a soothing sound. People emerged from their homes, stretching and yawning as they began their day. Example 2: The car sped down the highway, weaving in and out of traffic. The driver gri…	no	no	a-is-slightly-better			cl	2023-05-18 23:45:34
88	213	user_oriented_task_37	Give a brief description of the given category of movies and shows. Period Dramas	tulu_65B	tulu_7B	Period dramas are a genre of movies and shows that are set in a specific time period, often in the past, and feature characters and events that are representative of that era. These productions often focus on historical events, societal norms, and cultural practices of the time, and can range from romanticized depictions to more realistic portrayals. Period dramas can span across various time per…	Period dramas are films or television shows that are set in a specific time period, often in the past, and often depicting historical events or the lives of historical figures. These dramas often feature elaborate costumes, sets, and production design to transport viewers to another time and place. They can be romantic, political, or social in nature, and often explore themes of love, loss, and s…	yes	yes	b-is-slightly-better			cl	2023-05-18 23:46:12
91	214	user_oriented_task_92	Design a programming problem related to the subject that has been given to you. Use some examples and constraints to improve your question. Dynamic Programming	tulu_65B	tulu_7B	**Problem:** Longest Common Subsequence (LCS) **Description:** Given two strings, find the longest common subsequence between them. **Example:** Input strings: "ABCDEFG" and "KQJELDHABMXP" Output: "ABCDEFG" **Constraints:** 1. The length of the input strings will be between 1 and 1000. 2. The characters in the input strings will only contain lowercase letters. 3. The output should be the longest …	A company has a fleet of delivery trucks that need to be dispatched to various locations to deliver goods. The company wants to minimize the total distance traveled by the trucks while ensuring that each location is visited exactly once. One possible approach to solve this problem is to use dynamic programming. Dynamic programming is a technique that allows us to solve a problem by breaking it do…	yes	no	a-is-slightly-better			cl	2023-05-18 23:47:31
94	215	user_oriented_task_179	Extract the method that has been used in the research from the abstract of the paper. Give the exact sentences from the abstract that discuss the method. We present a state-of-the-art speech recognition system developed using end-to-end deep learning. Our architecture is significantly simpler than traditional speech systems, which rely on laboriously engineered processing pipelines; these traditi…	tulu_65B	chatgpt	"Our architecture is significantly simpler than traditional speech systems, which rely on laboriously engineered processing pipelines; these traditional systems also tend to perform poorly when used in noisy environments. In contrast, our system does not need hand-designed components to model background noise, reverberation, or speaker variation, but instead directly learns a function that is rob…	The method used in the research is end-to-end deep learning for speech recognition. The abstract states, "We present a state-of-the-art speech recognition system developed using end-to-end deep learning." The system does not rely on traditional speech systems that use hand-designed components to model background noise, reverberation, or speaker variation. Instead, the system directly learns a fun…	yes	no	a-is-better			cl	2023-05-18 23:49:53
96	216	user_oriented_task_201	Provide a name for the dish given the ingredients and instructions. INGREDIENTS: 2 (5 oz) cans Bumble Bee® Solid White Albacore Tuna, drained 1 avocado 2 Tbsp Sriracha 1 Tbsp Dijon mustard 2 to 3 Tbsp celery, chopped 2 Tbsp red onion, chopped 2 green onions, chopped 1 Tbsp fresh cilantro, chopped Salt and pepper, to taste 2 heaping cups leafy green lettuce 1 cup matchstick carrots 4 (10 inch) who…	tulu_65B	chatgpt	Sriracha Tuna Avocado Wraps	Spicy Tuna and Avocado Wrap	yes	yes	tie			cl	2023-05-18 23:50:27
98	217	user_oriented_task_40	What is the output of the given LATEX code? \documentclass{article} \begin{document} First document. This is a simple example, with no extra parameters or packages included. \end{document}	tulu_65B	chatgpt	The output of the given LATEX code is a document with the text "First document. This is a simple example, with no extra parameters or packages included."	The output of the given LATEX code is a PDF document that contains the text "First document. This is a simple example, with no extra parameters or packages included."	yes	yes	tie			cl	2023-05-18 23:50:52
101	218	user_oriented_task_109	You can easily make your holidays more eco-friendly by following these simple steps:	tulu_65B	tulu_7B	1. Choose eco-friendly accommodation: Look for accommodations that have a strong commitment to sustainability, such as those that use renewable energy, conserve water, and reduce waste. 2. Use public transportation or carpool: Instead of driving alone, consider taking public transportation or carpooling with others to reduce your carbon footprint. 3. Reduce your energy consumption: Turn off light…	1. Reduce, Reuse, Recycle: Make sure to reduce waste by using reusable bags, containers, and water bottles. Reuse items as much as possible, and recycle materials that can be recycled. 2. Use Public Transportation: Instead of driving, use public transportation or carpool with friends and family to reduce your carbon footprint. 3. Walk or Bike: If possible, walk or bike to your destination instead…	yes	no	a-is-slightly-better			cl	2023-05-18 23:52:07
104	219	vicuna_30	Pretend to be a character in a post-apocalyptic world. Describe how you survive and the allies you encounter.	tulu_65B	tulu_7B	I am a scavenger, always on the lookout for my next meal. I have a few close friends who I can rely on in tough times. We all have different skills which help us survive.	I am a survivor in a post-apocalyptic world. The world has been ravaged by a catastrophic event that has left the landscape barren and dangerous. I have had to learn to adapt and survive in this harsh new world. I have learned to scavenge for food and water, and to build shelter using whatever materials I can find. I have also had to learn to defend myself against the dangers that lurk in the rui…	yes	yes	b-is-better			cl	2023-05-18 23:52:50
106	220	vicuna_68	Given that f(x) = 5x^3 - 2x + 3, find the value of f(2).	chatgpt	tulu_65B	To find f(2), we simply substitute x = 2 into the expression for f(x): f(2) = 5(2)^3 - 2(2) + 3 Simplifying the expression inside the parentheses first: f(2) = 5(8) - 4 + 3 Then, multiplying and adding: f(2) = 40 - 1 Finally, we get: f(2) = 39 Therefore, the value of f(2) is 39.	To find the value of f(2), we need to substitute the value of x with 2 in the given function f(x) = 5x^3 - 2x + 3. f(2) = 5(2)^3 - 2(2) + 3 f(2) = 5(8) - 4 + 3 f(2) = 40 - 4 + 3 f(2) = 39 Hence, the value of f(2) is 39.	yes	yes	b-is-slightly-better			cl	2023-05-18 23:53:48
85	221	vicuna_75	Draft an apology email to a customer who experienced a delay in their order, and provide reassurance that the issue has been resolved.	tulu_7B	tulu_65B	Dear [Customer], I am writing to apologize for the delay in your order. We understand how frustrating it can be to wait for a product that you have been eagerly anticipating, and we are truly sorry for any inconvenience this may have caused. Please know that we take full responsibility for the delay and are taking immediate steps to ensure that it does not happen again in the future. We understan…	Dear [Customer], I am writing to apologize for the delay you experienced with your recent order. We understand the inconvenience and frustration this may have caused, and we deeply regret any disappointment this may have caused. Please know that we take full responsibility for the delay and are taking immediate steps to ensure that this issue does not happen again in the future. Our team is dedic…	yes	yes	a-is-better			yul	2023-05-18 23:44:11
108	221	vicuna_75	Draft an apology email to a customer who experienced a delay in their order, and provide reassurance that the issue has been resolved.	tulu_65B	tulu_7B	Dear [Customer], I am writing to apologize for the delay you experienced with your recent order. We understand the inconvenience and frustration this may have caused, and we deeply regret any disappointment this may have caused. Please know that we take full responsibility for the delay and are taking immediate steps to ensure that this issue does not happen again in the future. Our team is dedic…	Dear [Customer], I am writing to apologize for the delay in your order. We understand how frustrating it can be to wait for a product that you have been eagerly anticipating, and we are truly sorry for any inconvenience this may have caused. Please know that we take full responsibility for the delay and are taking immediate steps to ensure that it does not happen again in the future. We understan…	yes	yes	tie			cl	2023-05-18 23:54:39
90	222	user_oriented_task_237	Using the ingredients that are available, create a dinner recipe. Kale + almond butter + apple cider vinegar + agave nectar + tamari	chatgpt	tulu_65B	Kale and Almond Butter Stir Fry Ingredients: - 1 bunch of kale, washed and chopped - 2 tablespoons of almond butter - 1 tablespoon of apple cider vinegar - 1 tablespoon of agave nectar - 1 tablespoon of tamari - 1 tablespoon of olive oil - 2 cloves of garlic, minced - Salt and pepper to taste Instructions: 1. In a small bowl, whisk together the almond butter, apple cider vinegar, agave nectar, an…	Here is a simple and delicious recipe for a Kale Salad with Almond Butter Dressing that you can make using the ingredients you have: Ingredients: - 1 bunch of kale - 2 tablespoons of almond butter - 2 tablespoons of apple cider vinegar - 1 tablespoon of agave nectar - 1 tablespoon of tamari Instructions: 1. Begin by washing and drying the kale leaves. Remove the stems and tear the leaves into bit…	yes	yes	b-is-better			yul	2023-05-18 23:46:29
97	223	user_oriented_task_171	Describe the responsibilities of the given job. Security Officer	tulu_65B	chatgpt	A Security Officer is responsible for protecting people, property, and assets by enforcing laws, preventing crime, and maintaining a safe and secure environment. Their specific responsibilities may vary depending on the industry or organization they work for, but some common duties include: 1. Patrolling designated areas on foot or in a vehicle to prevent and detect crime. 2. Responding to alarms…	A security officer is responsible for maintaining a safe and secure environment for people and property. Their responsibilities include: 1. Patrolling the premises: Security officers are responsible for patrolling the premises to ensure that there are no security breaches. They must be vigilant and alert at all times. 2. Monitoring surveillance equipment: Security officers must monitor surveillan…	yes	yes	b-is-slightly-better			yul	2023-05-18 23:50:28
99	224	user_oriented_task_155	The last message in the chat is a partial response. You should complete and rewrite it. + What are going to do now? - I don't know. I had to give up my dream of being a mathematician. + Why	tulu_65B	tulu_7B	I don't know. I had to give up my dream of being a mathematician.	I had to give up my dream of being a mathematician because I was not able to continue my studies due to financial difficulties.	no	yes	b-is-better			yul	2023-05-18 23:51:19
102	225	user_oriented_task_142	Based on the facts that have been provided, prove the following statement. Statement: "For every integer k, k^2 + 2k + 1 ≥ 0" Fact: The square of any real number is non-negative.	tulu_65B	tulu_7B	Proof: Let k be an integer. By the given fact, we know that k^2 ≥ 0. Adding 2k to both sides, we get: k^2 + 2k ≥ 0 Adding 1 to both sides, we get: k^2 + 2k + 1 ≥ 0 This completes the proof.	The statement "For every integer k, k^2 + 2k + 1 ≥ 0" can be proven using the fact that the square of any real number is non-negative. Proof: For every integer k, we have: k^2 + 2k + 1 = (k + 1)^2 Since the square of any real number is non-negative, we have: (k + 1)^2 ≥ 0 Therefore, k^2 + 2k + 1 ≥ 0. This completes the proof.	no	yes	b-is-better			yul	2023-05-18 23:52:10
103	226	user_oriented_task_200	Enter the words that satisfy the given condition. 5 Countries that Start with S	chatgpt	tulu_65B	1. Spain 2. Sweden 3. Switzerland 4. Slovakia 5. Slovenia	1. Sweden 2. Switzerland 3. Spain 4. South Africa 5. Singapore	yes	yes	tie			yul	2023-05-18 23:52:26
112	227	user_oriented_task_59	Design an outline for a blog post based on the given information and list the sections accordingly. This blog post is going to about making a list of last-minute gift ideas. Also, the tone of the post is going to be relaxed and casual.	tulu_65B	tulu_7B	I. Introduction A. Explanation of the purpose of the blog post B. Brief overview of the content II. Last-Minute Gift Ideas A. Gift ideas for different occasions 1. Birthdays 2. Anniversaries 3. Holidays B. Gift ideas for different relationships 1. Friends 2. Family members 3. Significant others C. Gift ideas for different interests 1. Hobbies 2. Fashion 3. Technology III. Conclusion A. Recap of t…	I. Introduction A. Explanation of the purpose of the blog post B. Brief overview of the gift ideas to be listed II. Last-Minute Gift Ideas A. Gift ideas for friends B. Gift ideas for family C. Gift ideas for coworkers D. Gift ideas for significant others III. Tone and Style A. Explanation of the tone and style of the post B. Examples of how the tone and style will be conveyed IV. Conclusion A. Re…	yes	yes	tie			yul	2023-05-18 23:59:34
114	228	user_oriented_task_188	You should capitalize the sentence according to the guide. Guide: Every other letter alternates between lower case and upper case. Sentence: A giant spider blocks your path.	chatgpt	tulu_65B	a GiAnT sPiDeR bLoCkS yOuR pAtH.	A Giant Spider Blocks Your Path.	yes	no	a-is-better			yul	2023-05-19
116	229	vicuna_23	If you were a Shakespearean character, how would you declare your love for someone in a soliloquy?	tulu_7B	tulu_65B	If I were a Shakespearean character, I would declare my love for someone in a soliloquy by speaking directly to them, expressing my deepest emotions and feelings in a poetic and passionate manner. I might use metaphors and comparisons to illustrate my love, and I would likely use language that is both romantic and poetic. For example, I might say something like: "My love, thou art a star, shining…	If I were a Shakespearean character, I would declare my love for someone in a soliloquy with the utmost passion and eloquence. I would speak of the fire that burns within my heart, the longing that consumes my every thought, and the tender affection that fills my soul. I would describe the beauty of my beloved, their virtues and graces, and how they have captured my heart and bound it to their ow…	yes	no	a-is-better			yul	2023-05-19 00:02:24
117	230	vicuna_52	What if the Aztecs had successfully repelled the Spanish conquistadors?	tulu_65B	tulu_7B	If the Aztecs had successfully repelled the Spanish conquistadors, it is likely that the course of history would have been significantly altered. The Aztec Empire would have been able to continue its rule over its territories, and it is possible that it would have continued to expand and flourish. The Aztecs were a powerful and advanced civilization, with a complex social and political structure,…	If the Aztecs had successfully repelled the Spanish conquistadors, it is possible that the course of history would have been significantly different. The Spanish conquest of the Aztec Empire in the 16th century had a profound impact on the region, leading to the collapse of the Aztec civilization and the spread of European diseases and culture. Without the Spanish conquest, it is possible that th…	yes	yes	tie			yul	2023-05-19 00:04:07
118	231	user_oriented_task_105	Please list the courses that someone interested in the first course might like. Bitcoin and Cryptocurrency Technologies	chatgpt	tulu_65B	1. Introduction to Blockchain Technology 2. Cryptography and Network Security 3. Digital Currency and Financial Systems 4. Distributed Systems and Consensus Algorithms 5. Smart Contracts and Decentralized Applications 6. Cybersecurity and Risk Management 7. Data Science and Analytics for Blockchain 8. Blockchain for Business and Enterprise 9. Ethereum and Solidity Programming 10. Cryptocurrency T…	Someone interested in the "Bitcoin and Cryptocurrency Technologies" course might also be interested in the following courses: 1. Introduction to Blockchain: This course provides an overview of blockchain technology, including its history, applications, and potential impact on various industries. 2. Cryptocurrency Investment and Trading: This course covers the basics of investing and trading crypt…	yes	yes	b-is-slightly-better			yul	2023-05-19 00:04:45
119	232	vicuna_56	What if Alan Turing had not cracked the Enigma code during World War II?	tulu_65B	tulu_7B	The outcome of World War II could have been very different. The Enigma code was a complex system used by the German military to send messages secretly. Cracking the code allowed the Allies to understand and intercept German communications, which gave them a significant advantage in the war. If the code had not been cracked, the war could have lasted longer and the outcome could have been very dif…	It is difficult to say exactly what the outcome would have been if Alan Turing had not cracked the Enigma code during World War II. However, it is widely believed that the success of the Allied forces in breaking the Enigma code was a major factor in the eventual victory of the Allies over the Axis powers. Without the Enigma code being broken, it is possible that the war could have lasted longer …	yes	yes	tie			yul	2023-05-19 00:05:21
187	233	user_oriented_task_45	How would you describe the meaning of this lyrics? Describe some of the metaphors. My lover’s got humor She’s the giggle at a funeral Knows everybody’s disapproval I should’ve worshipped her sooner	tulu_65B	chatgpt	The lyrics describe a person's lover as someone who brings lightness and joy even in difficult situations, as she is able to find humor in the midst of sadness. The metaphor of "giggle at a funeral" is used to illustrate this point, suggesting that the lover is able to bring a sense of levity and joy even in the midst of grief. The line "Knows everybody's disapproval" suggests that the lover is a…	The lyrics describe the singer's lover as someone who has a sense of humor, but also someone who is not well-liked by others. The metaphor of "the giggle at a funeral" suggests that the lover finds humor in inappropriate situations, which may be why others disapprove of her. The line "I should've worshipped her sooner" implies that the singer regrets not appreciating his lover's unique qualities …	yes	yes	a-is-slightly-better			yul	2023-05-19 06:55:26
188	234	user_oriented_task_207	Create a brief resume introduction using the following information. name: Mark nationality: Italian language: English attributes: creative, goal-oriented, motivated skills: software engineering, content marketing	tulu_65B	chatgpt	Hi, my name is Mark and I am an Italian national with a strong command of the English language. I am a creative, goal-oriented, and motivated individual with a passion for technology and innovation. With a background in software engineering and content marketing, I am confident in my ability to bring a unique perspective and skill set to any team.	Hello, my name is Mark and I am an Italian national with a strong command of the English language. I am a creative and goal-oriented individual who is highly motivated to achieve success in my career. With a background in software engineering and content marketing, I possess a unique set of skills that allow me to excel in both technical and creative fields.	yes	yes	a-is-slightly-better			yul	2023-05-19 06:56:59
189	235	user_oriented_task_149	Using a given amount, determine an appropriate tip. 14% tip on $47.50	tulu_7B	tulu_65B	Based on the given amount of $47.50, an appropriate tip would be $6.75. Here's the calculation: 14% of $47.50 is: 14% * $47.50 = $6.75 So, an appropriate tip on $47.50 would be $6.75.	The appropriate tip for $47.50 at a 14% rate would be $6.65.	no	yes	b-is-better			yul	2023-05-19 07:06:08
191	236	user_oriented_task_99	Improve the article using your knowledge of the topic in order to make it more informative. The "fair trade" movement, also known as the "trade justice" movement, promotes the use of labour, environmental and social standards for the production of commodities, particularly those exported from the Third and Second Worlds to the First World. Such ideas have also sparked a debate on whether trade it…	tulu_65B	tulu_7B	The "fair trade" movement, also known as the "trade justice" movement, is a global initiative that aims to promote sustainable and equitable trade practices. This movement advocates for the use of labor, environmental, and social standards in the production of commodities, particularly those exported from developing countries to developed nations. The fair trade movement seeks to address the powe…	The "fair trade" movement, also known as the "trade justice" movement, is a global effort to promote ethical and sustainable trade practices. This movement aims to ensure that the production of commodities, particularly those exported from the Third and Second Worlds to the First World, adheres to labor, environmental, and social standards. The idea behind fair trade is to create a more equitable…	yes	yes	tie			yul	2023-05-19 07:07:59
192	237	user_oriented_task_221	Make a list of the pros and cons of the given decision. Implementing a Remote Working Policy	tulu_65B	chatgpt	Pros: 1. Increased flexibility for employees in terms of work-life balance. 2. Reduced commute time and cost for employees. 3. Increased productivity and job satisfaction. 4. Access to a wider talent pool, as location is not a constraint. 5. Reduced need for office space and related expenses. Cons: 1. Difficulty in building team cohesion and collaboration. 2. Challenges in managing and monitoring…	Pros: 1. Increased flexibility for employees 2. Reduced commuting time and costs 3. Improved work-life balance 4. Access to a wider pool of talent 5. Reduced office space and overhead costs 6. Increased productivity due to fewer distractions and interruptions 7. Reduced carbon footprint and environmental impact Cons: 1. Reduced face-to-face interaction and collaboration 2. Difficulty in monitorin…	yes	yes	a-is-slightly-better			yul	2023-05-19 07:08:53
195	238	user_oriented_task_60	Write a section for a blog post and try to cover all of the provided information about this section in your text. Blog Topic: 7 Fall Fashion Trends Worth Taking on Your Trip Section Title: Trusty Jeans Main point of the section: jeans can be worn all year and look good with everything .	tulu_65B	chatgpt	When it comes to fall fashion, one item that never goes out of style is a good pair of jeans. Whether you prefer skinny, straight, or bootcut, jeans are a trusty wardrobe staple that can be worn all year round. Not only are they comfortable and versatile, but they also look great with everything from t-shirts to blazers. One of the reasons jeans are such a popular choice for fall is their ability…	Jeans are a timeless fashion staple that can be worn all year round, and they are especially perfect for fall. Whether you're going on a trip or just running errands, jeans are a versatile piece of clothing that can be dressed up or down. They are perfect for layering with cozy sweaters, jackets, and scarves, making them a must-have item for your fall wardrobe. One of the best things about jeans …	yes	yes	tie			yul	2023-05-19 07:11:53
196	239	vicuna_54	What if Isaac Newton had focused on biology instead of physics?	tulu_65B	tulu_7B	Isaac Newton was a physicist and mathematician, and his contributions to the field of physics were groundbreaking. However, it is possible to speculate about what might have happened if he had focused on biology instead. If Isaac Newton had focused on biology instead of physics, he might have made significant contributions to the field of biology. He was a brilliant thinker and observer, and he m…	If Isaac Newton had focused on biology instead of physics, the world would have been quite different. Biology is the study of living organisms, and it would have been fascinating to see how Newton's insights and discoveries in this field would have impacted our understanding of life and the natural world. Without the development of physics, which is the branch of science that deals with the behav…	yes	yes	b-is-slightly-better			yul	2023-05-19 07:13:12
200	240	user_oriented_task_72	Give the provided brand a motto to use as a part of its marketing strategies. The Ice cream shop is a small, quaint shop located in the heart of the historic district. They offer a variety of ice cream flavors, as well as Italian ice, gelato, and sorbet. The shop has a few tables and chairs, but most of their business is to-go. They offer a loyalty program where you can get a free scoop of ice cr…	tulu_7B	tulu_65B	"Scoops of happiness in every cone!"	"Scoops of happiness in every cone!"	yes	yes	tie			yul	2023-05-19 07:15:02
530	241	user_oriented_task_39	Imagine you have a FEN notation of a chessboard. How can you draw a board to show this state of the chessboard in LATEX? Create a LATEX code that includes all the required commands and packages.	tulu_65B	chatgpt	To draw a chessboard using LATEX, you can use the `chessboard` package. Here's an example code that loads the `chessboard` package and uses FEN notation to display a chessboard: ```latex \documentclass{article} \usepackage{chessboard} \begin{document} \chessboard[setboard=64, showmover=false, setpieces={ Kd7, Re8, Bd6, Rf8, Nf3, Nc3, Pd4, Pe5, Pg4, Ph5, Pb3, Pc6, pawns=false, }, fen= "rnbqkbnr/pp…	To draw a chessboard in LaTeX, we can use the `chessboard` package. To set up the board with the given FEN notation, we can use the `setchessboard` command. Here is an example code: ``` \documentclass{article} \usepackage{chessboard} \begin{document} \setchessboard{position=FEN} \chessboard \end{document} ``` Replace `FEN` with the actual FEN notation of the chessboard you want to draw. The `ches…	yes	no	a-is-better			yu	2023-05-19 22:27:11
533	242	user_oriented_task_146	Using a table, compare the career overviews of the given players in Major League Baseball. Use "|" for separating the columns in the table. Derek Jeter, Albert Pujols	tulu_65B	tulu_7B	| Derek Jeter | Albert Pujols | | --- | --- | | Played for the New York Yankees from 1995 to 2014 | Played for the St. Louis Cardinals from 2001 to 2011, and the Los Angeles Angels from 2012 to 2019 | | Won 5 World Series titles with the Yankees | Won 2 World Series titles with the Cardinals | | Won the Rookie of the Year award in 1996 | Won the Rookie of the Year award in 2001 | | Won the All-St…	| Position | Team | Years | Stats | | --- | --- | --- | --- | | Derek Jeter | New York Yankees | 2001-2014 | .312 BA, 200 HR, 3,465 Hits | | Albert Pujols | St. Louis Cardinals | 2001-2011 | .328 BA, 475 HR, 1,907 RBIs |	yes	no	a-is-better			yu	2023-05-19 22:30:13
535	243	user_oriented_task_158	The given text must be classified as offensive or not offensive. You acted really crazy last night.	tulu_65B	chatgpt	Not offensive.	Not offensive.	yes	yes	tie			yu	2023-05-19 22:31:24
536	244	vicuna_34	How can you determine if a person is genuinely interested in a conversation or simply being polite?	chatgpt	tulu_65B	As an AI language model, I don't have personal experiences or emotions to determine if a person is genuinely interested in a conversation or simply being polite. However, here are some signs that may indicate if a person is genuinely interested in a conversation: 1. They maintain eye contact and actively listen to what you're saying. 2. They ask follow-up questions and contribute to the conversat…	There are several signs that can indicate whether a person is genuinely interested in a conversation or simply being polite. Here are a few things to look out for: 1. Body language: People who are genuinely interested in a conversation tend to lean in, make eye contact, and nod their heads to show they are listening. On the other hand, people who are just being polite may have closed body languag…	yes	yes	tie			yu	2023-05-19 22:32:42
538	245	vicuna_65	Implement a binary search algorithm to find a specific element in a sorted array.	tulu_7B	tulu_65B	def binary_search(arr, target): low = 0 high = len(arr) - 1 while low <= high: mid = (low + high) // 2 if arr[mid] == target: return mid elif arr[mid] < target: low = mid + 1 else: high = mid - 1 return -1	def binary_search(arr, x): low = 0 high = len(arr) - 1 while low <= high: mid = (low + high) // 2 if arr[mid] == x: return mid elif arr[mid] < x: low = mid + 1 else: high = mid - 1 return -1	yes	yes	tie			yu	2023-05-19 22:33:06
540	246	user_oriented_task_206	Provide a pleasant compliment based on the quality you have been given. Truthfulness	tulu_7B	tulu_65B	I appreciate your honesty and truthfulness in our interactions. It shows that you value transparency and integrity, which are important qualities to have in any relationship. Keep shining!	You have a remarkable quality of being truthful, which is truly admirable and appreciated. Your honesty and integrity shine through in everything you do, and it is a pleasure to know and interact with someone as trustworthy as you. Keep up the great work!	yes	yes	tie			yu	2023-05-19 22:33:52
542	247	user_oriented_task_143	Verify the correctness of the given statement. "For all integers j and k, if j and k are odd, then jk is odd."	tulu_65B	chatgpt	The statement is true. If both j and k are odd, then their product jk will also be odd.	True. To prove this statement, we can use the definition of odd numbers. An odd number is any integer that can be written in the form 2n+1, where n is an integer. If j and k are odd, then we can write them as j=2a+1 and k=2b+1, where a and b are integers. Then, jk = (2a+1)(2b+1) = 4ab + 2a + 2b + 1 = 2(2ab + a + b) + 1. Since 2ab + a + b is an integer, we can write jk in the form 2n+1, where n = …	yes	yes	b-is-better			yu	2023-05-19 22:39:52
566	247	user_oriented_task_143	Verify the correctness of the given statement. "For all integers j and k, if j and k are odd, then jk is odd."	chatgpt	tulu_65B	True. To prove this statement, we can use the definition of odd numbers. An odd number is any integer that can be written in the form 2n+1, where n is an integer. If j and k are odd, then we can write them as j=2a+1 and k=2b+1, where a and b are integers. Then, jk = (2a+1)(2b+1) = 4ab + 2a + 2b + 1 = 2(2ab + a + b) + 1. Since 2ab + a + b is an integer, we can write jk in the form 2n+1, where n = …	The statement is true. If both j and k are odd, then their product jk will also be odd.	yes	yes	a-is-better			yu	2023-05-20 03:32:40
567	248	user_oriented_task_49	You are given a description that provides a set of facts or a scenario. It is up to you to craft a story from these facts and scenarios. The missing pieces must be filled in with imaginative but logical information. Ten European football teams – the Netherlands, England, Belgium, Denmark, France, Germany, Norway, Sweden, Switzerland and Wales – will participate in a season-long “OneLove” campaign…	tulu_65B	tulu_7B	The world of football was abuzz with excitement as ten European teams came together for a unique campaign. The Netherlands, England, Belgium, Denmark, France, Germany, Norway, Sweden, Switzerland, and Wales all joined forces to promote inclusion and take a stand against discrimination. The campaign, dubbed "OneLove," was a season-long initiative that aimed to bring fans and players together in a …	The "OneLove" campaign was launched by UEFA, the governing body of European football, to promote inclusion and combat discrimination in the sport. The campaign was inspired by the growing problem of discrimination in football, which has been a major issue in recent years. The campaign will run throughout the 2022-2023 season, with each of the ten participating teams committing to promoting inclus…	yes	yes	tie			yu	2023-05-20 03:34:00
568	249	user_oriented_task_90	You are given a question and two possible answers. The task is to evaluate each answer and determine if it is correct. If incorrect, explain why. Is there a way of reading one single character from the user input? For instance, they press one key at the terminal and it is returned (sort of like getch()). I know there's a function in Windows for it, but I'd like something that is cross-platform. A…	chatgpt	tulu_65B	Answer 1 is correct. It provides a solution that is cross-platform and allows for reading a single character from user input. Answer 2 is incorrect as it does not address the question of how to read a single character from user input. It only suggests a way to hold the screen.	Answer 1 is correct. The link provided in the answer explains how to read a single character from the user input in Windows, Linux, and OSX using the getch() function. This function is not available in all platforms, so the recipe provides a cross-platform solution using the termios library in Linux and the conio library in Windows. Answer 2 is incorrect. The input() function in Python does not h…	yes	yes	b-is-slightly-better			yu	2023-05-20 03:35:25
569	250	vicuna_29	As a space colonist on Mars, describe your daily life and the challenges you face living on another planet.	tulu_65B	chatgpt	As a space colonist on Mars, my daily life is vastly different from what I would experience on Earth. The Martian environment is harsh and unforgiving, and I must be constantly aware of the dangers that come with living on another planet. One of the biggest challenges I face is the extreme cold. Mars has an average temperature of -63 degrees Fahrenheit, and the temperature can drop to as low as -…	As an AI language model, I do not have personal experiences, thoughts, or feelings. However, I can provide a hypothetical response to your prompt. As a space colonist on Mars, my daily life would be vastly different from life on Earth. I would wake up in a small, cramped living space and begin my day by checking the air and water filtration systems to ensure they are functioning properly. I would…	yes	yes	tie			yu	2023-05-20 03:37:01
571	251	user_oriented_task_245	Define what the underlined word means for kids. _keep a promise	tulu_65B	tulu_7B	Keeping a promise means to do what you said you would do, even if it's hard or takes a long time. It means being honest and reliable, and showing that you are trustworthy. When you make a promise, you are making a commitment to do something, and keeping that promise shows that you are responsible and respectful of others.	Keeping a promise means doing what you said you would do, just like a grown-up would. It's important to keep our promises because it helps us build trust with others and shows that we are reliable and honest.	yes	yes	tie			yu	2023-05-20 03:38:14
572	252	user_oriented_task_63	You are given a topic for an Instagram post. Help the post reach a broader audience by suggesting hashtags related to the post. Another episode of women in science is out now	chatgpt	tulu_65B	#WomenInScience #ScienceWomen #WomenInSTEM #STEMWomen #WomenScientists #WomenInTech #WomenInEngineering #WomenInMath #WomenInMedicine #WomenInResearch #WomenInAcademia #WomenInnovation #WomenEmpowerment #WomenLeaders #WomenTrailblazers #WomenInspiringWomen #WomenSupportingWomen #WomenBreakingBarriers #WomenMakingHistory #WomenWhoLead #WomenInHistory #WomenInventors #WomenInventorsAndInnovators #W…	#WomenInScience #ScienceCommunication #WomenInSTEM #ScienceEducation #WomenInTech #ScienceAndTech #WomenInResearch #ScienceAndSociety #WomenInEngineering #ScienceAndEngineering #WomenInMedicine #ScienceAndMedicine #WomenInMath #ScienceAndMath #WomenInPhysics #ScienceAndPhysics #WomenInBiology #ScienceAndBiology #WomenInChemistry #ScienceAndChemistry #WomenInGeology #ScienceAndGeology #WomenInAstr…	yes	yes	tie			yu	2023-05-20 03:38:31
574	253	user_oriented_task_174	Find the directions between the given locations. From: Rowan Avenue Elementary School, 600 S Rowan Ave, Los Angeles, CA 90023, United States To: Calvary Cemetery and Mortuary, 4201 Whittier Blvd, Los Angeles, CA 90023, United States	chatgpt	tulu_65B	1. Head east on S Rowan Ave toward E 6th St 2. Turn right onto E 4th St 3. Turn left onto S Soto St 4. Turn right onto Whittier Blvd 5. Calvary Cemetery and Mortuary will be on the right.	To get directions from Rowan Avenue Elementary School to Calvary Cemetery and Mortuary, I need an API key for Google Maps. Once I have the key, I can provide you with the route and distance between the two locations.	no	no	tie			yu	2023-05-20 03:39:32
575	254	user_oriented_task_9	A helpful writing exercise is writing a story without using adjectives or adverbs. This will help you learn to use other words and phrases to describe what you are trying to say. Here are some examples:	tulu_65B	tulu_7B	Sure, I'd be happy to help you with that! Can you please provide me with more information about the story you want to write?	I see. That's an interesting exercise. Using only nouns and verbs to describe a scene can definitely challenge a writer to be more creative with their word choices. It can also help to focus on the action and characters in a scene, rather than relying on descriptive language to set the mood or atmosphere. Thank you for sharing this exercise with me.	no	no	tie			yu	2023-05-20 03:40:15
576	255	user_oriented_task_183	Categorize the given magazine based on its content into one of the categories: Politics, Entertainment News, Tech News, Business News, Parenting & Kids, Health & Healing, Cooking, Food & Wine, and Arts & Literature, Inc.	chatgpt	tulu_65B	Business News	Business News	yes	yes	tie			yu	2023-05-20 03:40:42
577	256	user_oriented_task_7	Write a social media post about the call for collaboration on a crowdsourcing project in a persuasive way.	tulu_7B	tulu_65B	Attention all creatives and innovators! A unique crowdsourcing project is calling for your collaboration and we want you to be a part of it. This project is an opportunity to showcase your talents, connect with like-minded individuals, and make a real impact in the world. By joining forces, we can create something truly special and leave a lasting legacy. Don't miss out on this chance to be a par…	Are you ready to make a difference? We are excited to announce a new crowdsourcing project that needs your help! By collaborating with us, you can be a part of something truly impactful and help shape the future. This is your chance to contribute your skills, ideas, and passion to a project that will have a real and lasting impact. Don't miss this opportunity to be a part of something bigger than…	yes	yes	tie			yu	2023-05-20 03:41:17
578	257	user_oriented_task_186	Come up with an interesting idea for a new movie plot. Your plot should be described with a title and a summary.	chatgpt	tulu_65B	Title: The Last Time Traveler Summary: In the year 2050, time travel has become a reality and is used for various purposes. However, when a young scientist discovers that time travel is causing irreversible damage to the fabric of time, she sets out on a mission to find the last time traveler who can help her fix the damage before it's too late. Along the way, she faces challenges and obstacles a…	Title: "Chronicles of the Lost City" Summary: In a world where technology has advanced to the point of being able to teleport to different dimensions, a group of explorers stumble upon an ancient, abandoned city that holds many secrets and mysteries. As they begin to uncover the history of the lost city, they realize that they are not alone and that there are forces at work that threaten to destr…	yes	yes	tie			yu	2023-05-20 03:42:52
579	258	user_oriented_task_157	Currently, there is a chat in which people are arranging a meeting in the future. Retrieve the meeting information from the conversation. Person 1: Hey, when are you free? I'd like to meet up. Person 2: I'm free tomorrow afternoon. Person 1: Great, what time? Person 2: How about 3 pm? Person 1: I have another meeting at that time. what about 5 pm? Person 2: That works. Where should we meet? Perso…	chatgpt	tulu_65B	Meeting date: Tomorrow Meeting time: 5 pm Meeting location: Coffee shop on Main Street	The meeting will take place tomorrow at 5 pm at the coffee shop on Main Street.	yes	yes	a-is-slightly-better			yu	2023-05-20 03:43:18
580	259	user_oriented_task_21	During writing, we added an asterisk for the word that did not come to mind. You will need to provide several examples to demonstrate all the words that can be used in the sentence instead of the asterisk. we * to know	chatgpt	tulu_65B	- we want to know - we need to know - we have to know - we desire to know - we yearn to know - we crave to know - we aspire to know - we aim to know - we hope to know - we wish to know - we long to know - we hunger to know - we thirst to know - we seek to know - we strive to know	we want to know we desire to know we crave to know we yearn to know we aspire to know we long to know we hanker to know we pine to know we thirst to know we lust to know we are curious to know we are eager to know we are interested to know we are intrigued to know we are fascinated to know we are captivated to know we are drawn to know we are pulled to know we are compelled to know we are driven …	yes	yes	b-is-slightly-better			yu	2023-05-20 03:44:07
581	260	user_oriented_task_169	You will be required to write a few questions from the given company's interview section. Kohl's	tulu_65B	tulu_7B	1. Can you tell us about a time when you had to handle a difficult customer? How did you resolve the situation? 2. How do you stay organized and manage multiple tasks at the same time? 3. How do you handle a situation when you are not sure of the answer? 4. Can you give an example of a time when you had to communicate a difficult message to a team member or customer? How did you approach the situ…	1. What are the most important qualities you look for in a Kohl's employee? 2. How does Kohl's support the professional growth and development of its employees? 3. Can you tell us about a time when you had to make a difficult decision at work? 4. How does Kohl's measure employee success and performance? 5. Can you describe the company culture at Kohl's? 6. How does Kohl's promote teamwork and col…	yes	yes	a-is-slightly-better			yu	2023-05-20 03:44:39
582	261	user_oriented_task_98	Summarize the article you have been given in a brief manner. Mathematics and art are related in a variety of ways. Mathematics has itself been described as an art motivated by beauty. Mathematics can be discerned in arts such as music, dance, painting, architecture, sculpture, and textiles. This article focuses, however, on mathematics in the visual arts. Mathematics and art have a long historica…	tulu_65B	tulu_7B	The article discusses the relationship between mathematics and art, and how artists have used mathematics in their work throughout history. The article focuses on the use of mathematics in the visual arts, and mentions the use of the golden ratio, perspective, tessellation, and hyperbolic geometry in various art forms such as sculpture, painting, architecture, and textiles. The article also menti…	The article discusses the relationship between mathematics and art, highlighting the historical connection between the two. It mentions that artists have used mathematics since ancient times, with the Greek sculptor Polykleitos using the ratio 1:√2 in his work. The Renaissance saw the publication of the influential treatise De divina proportione by Luca Pacioli, illustrated by Leonardo da Vinci, …	yes	yes	a-is-slightly-better			yu	2023-05-20 03:45:01
583	262	user_oriented_task_75	Write an email to attendees as a reminder that the event is coming up.	chatgpt	tulu_65B	Subject: Reminder: Upcoming Event Dear [Attendee Name], I hope this email finds you well. I am writing to remind you that our upcoming event is just around the corner. We are excited to have you join us for this special occasion. As a quick reminder, the event will take place on [Date] at [Time] at [Venue]. We have an exciting lineup of speakers, activities, and networking opportunities planned f…	Dear attendees, We hope this email finds you well. We are writing to remind you that our upcoming event is just around the corner. The date and time are approaching, and we wanted to make sure that you have all the necessary information. Please find below the details of the event: Date: [Insert Date] Time: [Insert Time] Venue: [Insert Venue] Dress Code: [Insert Dress Code] We are looking forward …	yes	yes	tie			yu	2023-05-20 03:45:37
584	263	vicuna_55	What if the Beatles had never formed as a band?	chatgpt	tulu_65B	If the Beatles had never formed as a band, the music industry would have been drastically different. The Beatles were one of the most influential bands of all time, and their music had a profound impact on popular culture. Without the Beatles, the British Invasion may not have happened, and the music of the 1960s would have been very different. Other bands and artists may have risen to prominence…	The Beatles were a highly influential band in the 20th century. They were formed in Liverpool, England in 1960 and disbanded in 1970. They produced 13 albums and had 20 number one songs on the billboard top 100. They were the most commercially successful band in the history of music. They were also the first band to perform at a large stadium. They were the first band to produce music videos. The…	yes	no	a-is-better			yu	2023-05-20 03:46:00
585	264	user_oriented_task_18	Design a soothing pastel color palette for your slides. Pastel colors generally come across as pretty and delicate, so you’ll want to make sure your presentation calls for a similar mood. Choose up to five colors or color codes.	tulu_65B	chatgpt	Sure, here are five pastel colors that could work well for a soothing color palette: 1. Light Peach: #FFD7BE 2. Robin Blue: #F7E3D7 3. Pale Green: #C7EA7A 4. Soft Pink: #FFB6C9 5. Lilac: #C7D2EA These colors have a calming effect and can create a serene atmosphere for your presentation. You can use them as background colors, accent colors, or to highlight important information. Remember to use th…	1. #F5B7B1 (light pink) 2. #AED6F1 (light blue) 3. #F9E79F (pale yellow) 4. #D2B4DE (lavender) 5. #FADBD8 (peach)	yes	yes	a-is-slightly-better			yu	2023-05-20 03:47:00
586	265	user_oriented_task_76	It would be helpful if you could suggest an acronym for the repository. A python framework for creating, editing, and invoking Noisy Intermediate Scale Quantum (NISQ) circuits.	chatgpt	tulu_65B	NISQPy	How about "QCircuit"?	yes	yes	a-is-better			yu	2023-05-20 03:47:15
587	266	user_oriented_task_70	Find synonyms for the given word. You need to write down how the provided synonyms differ from the original word in terms of meaning, usage, etc. adversity	tulu_7B	tulu_65B	Synonyms for adversity: 1. Hardship 2. Struggle 3. Difficulty 4. Trial 5. Tribulation 6. Ordeal 7. Test 8. Temptation 9. Affliction 10. Misfortune Differences from adversity: 1. Hardship is a general term that can refer to any difficult or unpleasant situation, while adversity specifically refers to a difficult or unpleasant situation that one faces. 2. Struggle is a term that implies a more acti…	1. Difficulty: Difficulty is similar to adversity in that it refers to a challenging situation or circumstance. However, adversity often implies a more prolonged or severe challenge, while difficulty may be more temporary or minor in nature. 2. Trouble: Trouble is another word that is similar to adversity, but it often has a more negative connotation. Adversity can refer to any type of challenge,…	yes	yes	a-is-better			yu	2023-05-20 03:47:49
715	267	user_oriented_task_249	Suggest some names for a friendly group in telegram.	tulu_65B	tulu_7B	​	​	no	no	tie			yi	2023-05-21 02:24:12
589	268	user_oriented_task_27	You will be asked to answer the following question as part of the LinkedIn Skill assessments. You find that your project has a tag and branch both named push-notifications, which causes confusion when trying to print out given reference. How can you specify which branch you want to look at?	tulu_7B	tulu_65B	To specify which branch you want to look at when printing out a reference, you can use the `git branch` command with the `-a` or `--all` option. This will show you all branches, including the one you are currently on. You can then use the `git branch` command with the `-r` or `--reference` option to specify the branch you want to look at. For example, if you are currently on the `push-notificatio…	You can specify which branch you want to look at by using the --branch option followed by the name of the branch. For example, to print out the push-notifications branch, you can use the command "git checkout --branch push-notifications".	yes	yes	a-is-slightly-better			yu	2023-05-20 07:11:49
590	269	user_oriented_task_218	A user story is an informal, general explanation of a software feature written from the perspective of the end user or customer. Write a user story for a given software. Gmail	chatgpt	tulu_65B	As a busy professional, I want to be able to easily manage my emails in one place, so that I can stay organized and respond to important messages quickly. I need a software like Gmail that allows me to easily compose, send, and receive emails from multiple accounts, as well as organize my inbox with labels and filters. Additionally, I want to be able to access my emails from any device, whether i…	As a busy professional, I want to be able to efficiently manage my emails and stay organized, so that I can quickly respond to important messages and keep my inbox clutter-free. Gmail provides me with features such as labels, filters, and the ability to star and mark messages as spam, allowing me to easily sort and prioritize my emails. Additionally, the search function allows me to quickly find …	yes	yes	tie			yu	2023-05-20 07:11:58
591	270	user_oriented_task_230	Take the product description and write a creative ad for it. Document Cameras allow teachers to display documents, books, or other materials for their students to see.	tulu_7B	tulu_65B	"Unlock the world of learning with our Document Camera! Say goodbye to dull textbooks and hello to interactive lessons. With our Document Camera, teachers can easily display any document, book or material for their students to see, making learning more engaging and fun. Upgrade your classroom today and give your students the best education possible with our Document Camera!"	Introducing the ultimate teaching tool: the Document Camera! Say goodbye to old-fashioned overhead projectors and hello to crystal-clear images and videos. With the touch of a button, you can display any document, book, or material for your students to see. It's the perfect way to bring your lessons to life and keep your students engaged. Get yours today and take your teaching to the next level!	yes	yes	tie			yu	2023-05-20 07:12:10
592	271	user_oriented_task_82	Decide whether children can watch the given movie. Mention what makes it inappropriate if you think they can't. The Dark Knight (2008)	chatgpt	tulu_65B	Children should not watch The Dark Knight (2008) as it is rated PG-13 for intense sequences of violence and some menace. The movie contains several scenes of intense violence, including shootings, explosions, and hand-to-hand combat. The themes of the movie are also quite dark and complex, dealing with issues such as corruption, terrorism, and vigilantism. The movie may be too intense and disturb…	No, children should not watch The Dark Knight (2008). This movie is rated PG-13 for intense sequences of action and violence, disturbing images and content, language, and some smoking. It contains scenes of graphic violence, terrorism, and mature themes that may be too disturbing and inappropriate for children. It is important for parents to be cautious about the media their children consume and …	yes	yes	tie			yu	2023-05-20 07:12:22
593	272	user_oriented_task_134	Solve the given Sudoku puzzle. The Sudoku puzzle is: |1| |5| | | | |8| | | | | | | |3| |6|4| |8|3|4|6|7| |9| | | |2|9|1| | |8|3|7|6| | | |6| | |9|8|1| | | | | | | |2| | | | | |2| | |9|7|6| | | |5|4| | | | | |9|8| |6|1| | | |5|4|3|7|	chatgpt	tulu_65B	The solved Sudoku puzzle is: |1|7|5|4|6|9|2|3|8| |9|2|8|1|5|3|7|6|4| |8|3|4|6|7|2|9|5|1| |2|9|1|5|4|8|3|7|6| |7|5|6|3|1|9|8|2|4| |4|8|3|7|0|2|5|1|9| |3|2|9|8|0|7|6|4|5| |5|4|7|2|3|1|0|9|8| |6|1|0|9|8|5|4|3|7| Note: The "0" in the solved puzzle represents the missing number that should be filled in that cell.	The solution to the given Sudoku puzzle is: |1| |5| | | | |8| | | | | | | |3| |6|4| |8|3|4|6|7| |9| | | |2|9|1| | |8|3|7|6| | | |6| | |9|8|1| | | | | | | |2| | | | | |2| | |9|7|6| | | |5|4| | | | | |9|8| |6|1| | | |5|4|3|7|	no	no	a-is-slightly-better			yu	2023-05-20 07:13:06
594	273	user_oriented_task_66	Using the provided topic as a starting point, brainstorm ideas for videos that can be made about it on YouTube. In spite of the fact that procrastination feels bad to you, why do you do it?	chatgpt	tulu_65B	1. "The Science of Procrastination" - a video exploring the psychological and neurological reasons behind why we procrastinate. 2. "Procrastination Hacks" - a video sharing tips and tricks for overcoming procrastination and increasing productivity. 3. "The Art of Procrastination" - a humorous take on the topic, featuring funny skits and relatable scenarios. 4. "Procrastination and Mental Health" …	1. "5 Tips to Overcome Procrastination and Boost Productivity" 2. "The Science Behind Procrastination: Why We Do It and How to Stop" 3. "Procrastination vs. Productivity: A Day in the Life of a Procrastinator" 4. "The Negative Impact of Procrastination on Mental Health" 5. "How to Identify and Change Your Procrastination Habits" 6. "Procrastination: The Silent Killer of Dreams and Goals" 7. "The …	yes	yes	a-is-slightly-better			yu	2023-05-20 07:13:24
596	274	user_oriented_task_170	Based on the information provided, you need to estimate the average summary for the given job. Data entry clerk in United States	chatgpt	tulu_65B	The average summary for a data entry clerk in the United States would be: "Responsible for accurately inputting data into computer systems, maintaining databases, and ensuring data integrity. Requires strong attention to detail, computer proficiency, and ability to work independently. May also be responsible for basic administrative tasks."	Based on the information provided, the estimated average salary for a data entry clerk in the United States is $30,930 per year, according to data from the US Bureau of Labor Statistics. However, it is important to note that salaries can vary widely depending on factors such as location, experience, and company.	yes	yes	tie			yu	2023-05-20 07:15:08
597	275	user_oriented_task_192	List the concepts that should be learned before approaching the given complex concept. Deep Learning	tulu_65B	tulu_7B	Before approaching the complex concept of Deep Learning, it is important to have a solid understanding of the following concepts: 1. Artificial Neural Networks (ANNs): Deep Learning is a subset of ANNs, so understanding the basics of ANNs is essential. 2. Linear Algebra: Deep Learning involves a lot of matrix operations, so a good understanding of linear algebra is necessary. 3. Probability and S…	Before approaching the complex concept of Deep Learning, it is important to have a strong understanding of the following concepts: 1. Machine Learning: This includes the basic concepts of supervised and unsupervised learning, as well as the different types of algorithms used in machine learning, such as linear regression, decision trees, and neural networks. 2. Artificial Intelligence: This inclu…	yes	yes	a-is-slightly-better			yu	2023-05-20 07:15:21
598	276	user_oriented_task_22	Think of alternatives and paraphrases for the underlined word. what we have _expected	tulu_65B	chatgpt	1. What we have anticipated 2. What we have predicted 3. What we have foreseen 4. What we have envisioned 5. What we have presumed 6. What we have assumed 7. What we have speculated 8. What we have theorized 9. What we have postulated 10. What we have surmised	anticipated, predicted, foresaw, projected, imagined, supposed, presumed, envisaged, foreseen, counted on, planned for, hoped for	yes	yes	tie			yu	2023-05-20 07:16:07
599	277	vicuna_58	What if the Maya civilization had never mysteriously collapsed?	tulu_65B	tulu_7B	If the Maya civilization had never mysteriously collapsed, it is possible that they would have continued to thrive and develop their advanced culture, technology, and architecture. They may have also continued to expand their empire and influence, potentially leading to a very different history of the Americas. It is also possible that the Maya civilization would have faced new challenges and con…	It is impossible to say what would have happened if the Maya civilization had not collapsed. However, it is likely that the Maya civilization would have continued to develop and grow, perhaps reaching even greater heights of cultural and technological achievement. The collapse of the Maya civilization is a complex and multifaceted event that is still not fully understood, and it is impossible to …	yes	yes	a-is-better			yu	2023-05-20 07:16:37
600	278	user_oriented_task_45	How would you describe the meaning of this lyrics? Describe some of the metaphors. My lover’s got humor She’s the giggle at a funeral Knows everybody’s disapproval I should’ve worshipped her sooner	tulu_7B	tulu_65B	The lyrics describe a person who is described as having a sense of humor, being able to bring joy and laughter to a somber occasion, and being well-liked by others. The speaker expresses regret for not having appreciated the person sooner.	The lyrics describe a person's lover as someone who brings lightness and joy even in difficult situations, as she is able to find humor in the midst of sadness. The metaphor of "giggle at a funeral" is used to illustrate this point, suggesting that the lover is able to bring a sense of levity and joy even in the midst of grief. The line "Knows everybody's disapproval" suggests that the lover is a…	yes	yes	b-is-slightly-better			yu	2023-05-20 07:18:21
601	279	user_oriented_task_216	Create a template in markdown to create scope for Jira tickets. Members should use this template as a checklist to ensure they have included all the necessary information when creating a ticket.	tulu_65B	tulu_7B	Here is a template in markdown that can be used as a checklist for creating Jira tickets: Title: [Insert Ticket Title] Description: * [Insert brief description of the issue or task] * [Insert any relevant context or background information] Scope: * [Insert a clear and concise statement of the problem or goal] * [Insert any specific requirements or constraints] * [Insert any assumptions or depende…	Here is a template in markdown that can be used as a checklist for creating a Jira ticket: ### Ticket Summary * **Summary**: A brief description of the issue or problem that needs to be addressed. * **Priority**: An indication of the urgency of the issue, with options such as "High", "Medium", and "Low". * **Type**: A categorization of the issue, such as "bug", "enhancement", or "incident". * **S…	yes	yes	tie			yu	2023-05-20 07:18:44
379	280	user_oriented_task_26	Make a list of desirable Skills for software engineers to add to LinkedIn.	tulu_65B	chatgpt	1. Proficiency in multiple programming languages 2. Experience with software development methodologies (e.g. Agile, Scrum) 3. Strong problem-solving and analytical skills 4. Familiarity with database management systems and SQL 5. Knowledge of software design patterns and architecture 6. Experience with version control systems (e.g. Git) 7. Familiarity with cloud computing platforms (e.g. AWS, Azu…	1. Programming languages: proficiency in languages such as Java, Python, C++, JavaScript, Ruby, etc. 2. Software development methodologies: experience with Agile, Scrum, Waterfall, etc. 3. Database management: knowledge of SQL, NoSQL, and database design. 4. Web development: expertise in HTML, CSS, and JavaScript frameworks such as React, Angular, and Vue. 5. Cloud computing: experience with clou…	yes	yes	b-is-slightly-better			ja	2023-05-19 20:11:46
602	280	user_oriented_task_26	Make a list of desirable Skills for software engineers to add to LinkedIn.	chatgpt	tulu_65B	1. Programming languages: proficiency in languages such as Java, Python, C++, JavaScript, Ruby, etc. 2. Software development methodologies: experience with Agile, Scrum, Waterfall, etc. 3. Database management: knowledge of SQL, NoSQL, and database design. 4. Web development: expertise in HTML, CSS, and JavaScript frameworks such as React, Angular, and Vue. 5. Cloud computing: experience with clou…	1. Proficiency in multiple programming languages 2. Experience with software development methodologies (e.g. Agile, Scrum) 3. Strong problem-solving and analytical skills 4. Familiarity with database management systems and SQL 5. Knowledge of software design patterns and architecture 6. Experience with version control systems (e.g. Git) 7. Familiarity with cloud computing platforms (e.g. AWS, Azu…	yes	yes	a-is-slightly-better			yu	2023-05-20 07:19:34
380	281	user_oriented_task_128	Come up with healthy and easy dinner ideas for weeknights.	tulu_65B	chatgpt	Here are some healthy and easy dinner ideas for weeknights: 1. Grilled chicken with roasted vegetables: Marinate chicken breasts in olive oil, lemon juice, and herbs, and grill them alongside your favorite vegetables, such as asparagus, bell peppers, and zucchini. 2. Quinoa and black bean bowl: Cook quinoa and black beans, and top with diced tomatoes, avocado, and a squeeze of lime juice. 3. Bake…	1. Grilled chicken with roasted vegetables 2. Quinoa and black bean salad 3. Baked salmon with sweet potato and green beans 4. Stir-fry with tofu and mixed vegetables 5. Turkey chili with avocado and whole grain crackers 6. Grilled shrimp skewers with quinoa and roasted asparagus 7. Lentil soup with whole grain bread 8. Baked sweet potato with black beans and salsa 9. Grilled chicken or tofu with…	yes	yes	a-is-slightly-better			ja	2023-05-19 20:12:02
603	281	user_oriented_task_128	Come up with healthy and easy dinner ideas for weeknights.	chatgpt	tulu_65B	1. Grilled chicken with roasted vegetables 2. Quinoa and black bean salad 3. Baked salmon with sweet potato and green beans 4. Stir-fry with tofu and mixed vegetables 5. Turkey chili with avocado and whole grain crackers 6. Grilled shrimp skewers with quinoa and roasted asparagus 7. Lentil soup with whole grain bread 8. Baked sweet potato with black beans and salsa 9. Grilled chicken or tofu with…	Here are some healthy and easy dinner ideas for weeknights: 1. Grilled chicken with roasted vegetables: Marinate chicken breasts in olive oil, lemon juice, and herbs, and grill them alongside your favorite vegetables, such as asparagus, bell peppers, and zucchini. 2. Quinoa and black bean bowl: Cook quinoa and black beans, and top with diced tomatoes, avocado, and a squeeze of lime juice. 3. Bake…	yes	yes	b-is-slightly-better			yu	2023-05-20 07:19:43
381	282	vicuna_6	What are the differences between plant-based and animal-based protein sources?	tulu_65B	tulu_7B	Plant-based protein sources are derived from plants and are usually less expensive than animal-based protein sources. Animal-based protein sources are derived from animals and are usually more expensive than plant-based protein sources.	Plant-based protein sources are derived from plants, while animal-based protein sources are derived from animals. Plant-based protein sources include legumes, nuts, seeds, grains, and vegetables, while animal-based protein sources include meat, poultry, fish, eggs, and dairy products. Some of the key differences between plant-based and animal-based protein sources include: 1. Nutritional content:…	yes	yes	b-is-slightly-better			ja	2023-05-19 20:12:24
604	282	vicuna_6	What are the differences between plant-based and animal-based protein sources?	tulu_65B	tulu_7B	Plant-based protein sources are derived from plants and are usually less expensive than animal-based protein sources. Animal-based protein sources are derived from animals and are usually more expensive than plant-based protein sources.	Plant-based protein sources are derived from plants, while animal-based protein sources are derived from animals. Plant-based protein sources include legumes, nuts, seeds, grains, and vegetables, while animal-based protein sources include meat, poultry, fish, eggs, and dairy products. Some of the key differences between plant-based and animal-based protein sources include: 1. Nutritional content:…	yes	yes	b-is-slightly-better			yu	2023-05-20 07:19:58
382	283	vicuna_7	How can I develop my critical thinking skills?	tulu_65B	chatgpt	Critical thinking is the ability to think clearly and rationally, analyzing information objectively and making a reasoned judgment. To develop your critical thinking skills, you can try the following strategies: 1. Ask questions: Asking questions helps you to analyze information, identify assumptions, and consider multiple perspectives. 2. Evaluate evidence: When evaluating evidence, consider the…	As an AI language model, I don't have personal experiences, but here are some ways to develop critical thinking skills: 1. Question assumptions: Challenge your own assumptions and those of others. Ask questions to clarify and understand the reasoning behind a particular belief or idea. 2. Analyze information: Evaluate the information you receive and consider the source, credibility, and relevance…	yes	yes	tie			ja	2023-05-19 20:12:42
605	283	vicuna_7	How can I develop my critical thinking skills?	chatgpt	tulu_65B	As an AI language model, I don't have personal experiences, but here are some ways to develop critical thinking skills: 1. Question assumptions: Challenge your own assumptions and those of others. Ask questions to clarify and understand the reasoning behind a particular belief or idea. 2. Analyze information: Evaluate the information you receive and consider the source, credibility, and relevance…	Critical thinking is the ability to think clearly and rationally, analyzing information objectively and making a reasoned judgment. To develop your critical thinking skills, you can try the following strategies: 1. Ask questions: Asking questions helps you to analyze information, identify assumptions, and consider multiple perspectives. 2. Evaluate evidence: When evaluating evidence, consider the…	yes	yes	tie			yu	2023-05-20 07:20:27
383	284	vicuna_43	How many lightning strikes occur on Earth each day? Try to explain your answer. Your explanation should take the reader through your reasoning step-by-step.	tulu_65B	chatgpt	There are about 100 lightning strikes per second on earth. There are 60 seconds in a minute, and 60 minutes in an hour. There are 24 hours in a day. So, there are 100 * 60 * 60 * 24 = 144000 strikes per day. The answer: 144000.	As an AI language model, I do not have access to the latest data on lightning strikes on Earth. However, according to the National Oceanic and Atmospheric Administration (NOAA), there are an estimated 100 lightning strikes per second, or 8.6 million per day, worldwide. This estimate is based on data collected from the World Wide Lightning Location Network (WWLLN), which uses a network of sensors …	no	yes	b-is-better			ja	2023-05-19 20:13:36
606	284	vicuna_43	How many lightning strikes occur on Earth each day? Try to explain your answer. Your explanation should take the reader through your reasoning step-by-step.	tulu_65B	chatgpt	There are about 100 lightning strikes per second on earth. There are 60 seconds in a minute, and 60 minutes in an hour. There are 24 hours in a day. So, there are 100 * 60 * 60 * 24 = 144000 strikes per day. The answer: 144000.	As an AI language model, I do not have access to the latest data on lightning strikes on Earth. However, according to the National Oceanic and Atmospheric Administration (NOAA), there are an estimated 100 lightning strikes per second, or 8.6 million per day, worldwide. This estimate is based on data collected from the World Wide Lightning Location Network (WWLLN), which uses a network of sensors …	no	yes	b-is-slightly-better			yu	2023-05-20 07:22:24
384	285	user_oriented_task_89	Answer the following question. How do I compare strings in Java? I've been using the == operator in my program to compare all my strings so far. However, I ran into a bug, changed one of them into .equals() instead, and it fixed the bug. Is == bad? When should it and should it not be used? What's the difference?	tulu_65B	tulu_7B	The == operator compares two objects by reference, meaning it checks whether the two variables point to the same object in memory. This is not what you want when comparing strings, because two strings can have the same contents but be different objects in memory. The .equals() method, on the other hand, compares two objects by value, meaning it checks whether the two strings have the same content…	The == operator compares the memory addresses of the two strings, whereas the .equals() method compares the contents of the strings. The == operator will return true if the two strings have the same length and contain the same characters in the same order. The .equals() method will return true if the two strings have the same length and contain the same characters in the same order, or if the two…	yes	no	a-is-better			ja	2023-05-19 20:14:17
607	285	user_oriented_task_89	Answer the following question. How do I compare strings in Java? I've been using the == operator in my program to compare all my strings so far. However, I ran into a bug, changed one of them into .equals() instead, and it fixed the bug. Is == bad? When should it and should it not be used? What's the difference?	tulu_65B	tulu_7B	The == operator compares two objects by reference, meaning it checks whether the two variables point to the same object in memory. This is not what you want when comparing strings, because two strings can have the same contents but be different objects in memory. The .equals() method, on the other hand, compares two objects by value, meaning it checks whether the two strings have the same content…	The == operator compares the memory addresses of the two strings, whereas the .equals() method compares the contents of the strings. The == operator will return true if the two strings have the same length and contain the same characters in the same order. The .equals() method will return true if the two strings have the same length and contain the same characters in the same order, or if the two…	yes	yes	tie			yu	2023-05-20 07:22:34
386	286	vicuna_27	Pretend to be a world-famous chef. How would you describe your signature dish to a panel of judges?	tulu_7B	tulu_65B	As a world-famous chef, my signature dish is a culinary masterpiece that combines my unique blend of flavors and techniques. It's a dish that has been carefully crafted over years of experimentation and refinement, and it showcases my passion for using the freshest and most exquisite ingredients. This dish is a perfect harmony of flavors, textures, and presentation. It's a dish that is both visua…	As a world-famous chef, my signature dish is a culinary masterpiece that showcases my passion for innovation and commitment to using only the finest and freshest ingredients. It's a dish that is both visually stunning and bursting with flavor, a true delight for the senses. At the heart of my signature dish is a succulent piece of perfectly cooked protein, sourced from local farms and prepared wi…	yes	yes	tie			ja	2023-05-19 20:15:10
608	286	vicuna_27	Pretend to be a world-famous chef. How would you describe your signature dish to a panel of judges?	tulu_65B	tulu_7B	As a world-famous chef, my signature dish is a culinary masterpiece that showcases my passion for innovation and commitment to using only the finest and freshest ingredients. It's a dish that is both visually stunning and bursting with flavor, a true delight for the senses. At the heart of my signature dish is a succulent piece of perfectly cooked protein, sourced from local farms and prepared wi…	As a world-famous chef, my signature dish is a culinary masterpiece that combines my unique blend of flavors and techniques. It's a dish that has been carefully crafted over years of experimentation and refinement, and it showcases my passion for using the freshest and most exquisite ingredients. This dish is a perfect harmony of flavors, textures, and presentation. It's a dish that is both visua…	yes	yes	tie			yu	2023-05-20 07:22:46
504	287	user_oriented_task_107	Create a daily itinerary based on the given information. Our family is looking for a 9-day Morocco trip that has light to moderate activity levels.	chatgpt	tulu_65B	Day 1: Arrival in Casablanca, transfer to hotel, and rest. Day 2: Visit the Hassan II Mosque in Casablanca, then drive to Rabat to explore the Kasbah of the Udayas and the Hassan Tower. Day 3: Drive to Chefchaouen, a beautiful blue-painted town in the Rif Mountains, and explore the medina. Day 4: Hike in the Rif Mountains, visit the Akchour Waterfalls, and enjoy a traditional Moroccan lunch. Day …	Here is a suggested 9-day itinerary for your family's trip to Morocco: Day 1: Arrival in Marrakech - Arrive in Marrakech and check into your hotel - Spend the afternoon exploring the city, including the famous Jemaa el-Fna square and the Bahia Palace - In the evening, enjoy a traditional Moroccan dinner at a local restaurant Day 2: Marrakech - Start the day with a visit to the Koutoubia Mosque an…	yes	yes	tie			ja	2023-05-19 21:43:41
609	287	user_oriented_task_107	Create a daily itinerary based on the given information. Our family is looking for a 9-day Morocco trip that has light to moderate activity levels.	chatgpt	tulu_65B	Day 1: Arrival in Casablanca, transfer to hotel, and rest. Day 2: Visit the Hassan II Mosque in Casablanca, then drive to Rabat to explore the Kasbah of the Udayas and the Hassan Tower. Day 3: Drive to Chefchaouen, a beautiful blue-painted town in the Rif Mountains, and explore the medina. Day 4: Hike in the Rif Mountains, visit the Akchour Waterfalls, and enjoy a traditional Moroccan lunch. Day …	Here is a suggested 9-day itinerary for your family's trip to Morocco: Day 1: Arrival in Marrakech - Arrive in Marrakech and check into your hotel - Spend the afternoon exploring the city, including the famous Jemaa el-Fna square and the Bahia Palace - In the evening, enjoy a traditional Moroccan dinner at a local restaurant Day 2: Marrakech - Start the day with a visit to the Koutoubia Mosque an…	yes	yes	b-is-slightly-better			yu	2023-05-20 07:23:20
506	288	user_oriented_task_144	Provide a formula for computing the nth term in the given sequence 5, 14, 23, 32, 41, ...	tulu_65B	chatgpt	The given sequence is an arithmetic sequence with a common difference of 9. The formula for the nth term of an arithmetic sequence is given by: Tn = a + (n-1)d where a is the first term of the sequence, d is the common difference, and n is the position of the term in the sequence. In this case, a = 5 and d = 9. So, the formula for the nth term of this sequence is: Tn = 5 + (n-1)9 So, the 2nd term…	The formula for computing the nth term in the sequence is: a_n = 5 + (n-1)9 where a_n represents the nth term in the sequence. Explanation: - The first term in the sequence is 5. - Each subsequent term is obtained by adding 9 to the previous term. - Therefore, the nth term can be obtained by adding (n-1) times 9 to the first term (5).	yes	yes	tie			ja	2023-05-19 21:44:25
610	288	user_oriented_task_144	Provide a formula for computing the nth term in the given sequence 5, 14, 23, 32, 41, ...	chatgpt	tulu_65B	The formula for computing the nth term in the sequence is: a_n = 5 + (n-1)9 where a_n represents the nth term in the sequence. Explanation: - The first term in the sequence is 5. - Each subsequent term is obtained by adding 9 to the previous term. - Therefore, the nth term can be obtained by adding (n-1) times 9 to the first term (5).	The given sequence is an arithmetic sequence with a common difference of 9. The formula for the nth term of an arithmetic sequence is given by: Tn = a + (n-1)d where a is the first term of the sequence, d is the common difference, and n is the position of the term in the sequence. In this case, a = 5 and d = 9. So, the formula for the nth term of this sequence is: Tn = 5 + (n-1)9 So, the 2nd term…	yes	yes	tie			yu	2023-05-20 07:24:01
508	289	user_oriented_task_139	Indicate the genre of the book to which it belongs. Love in the Time of Cholera	tulu_65B	chatgpt	Love in the Time of Cholera is a novel that belongs to the genre of literary fiction, specifically, magical realism.	Romance	yes	yes	tie			ja	2023-05-19 21:45:10
611	289	user_oriented_task_139	Indicate the genre of the book to which it belongs. Love in the Time of Cholera	chatgpt	tulu_65B	Romance	Love in the Time of Cholera is a novel that belongs to the genre of literary fiction, specifically, magical realism.	yes	yes	a-is-slightly-better			yu	2023-05-20 07:24:20
509	290	user_oriented_task_111	There are many creative projects we can build at home that are related to the given theme, so let's list some of them. Theme: Circuits	tulu_65B	tulu_7B	1. Build a simple circuit using a battery, a light bulb, and some wires to demonstrate how electricity flows. 2. Create a homemade burglar alarm that sounds an alarm when someone enters a room. 3. Make a simple electronic game, such as a Simon Says game, using circuits and lights. 4. Build a small solar-powered car that runs on sunlight. 5. Create a light-up greeting card that uses circuits to po…	Sure, here are some creative projects related to the theme of circuits that you can build at home: 1. DIY LED Light Circuit: You can create a simple circuit using an LED light and a battery to make a light-up project. 2. Battery-Powered Music Box: Build a simple music box that plays a tune when you wind up the battery. 3. Light-Up Birthday Card: Create a card that lights up when you open it, usin…	yes	yes	tie			ja	2023-05-19 21:45:32
612	290	user_oriented_task_111	There are many creative projects we can build at home that are related to the given theme, so let's list some of them. Theme: Circuits	tulu_65B	tulu_7B	1. Build a simple circuit using a battery, a light bulb, and some wires to demonstrate how electricity flows. 2. Create a homemade burglar alarm that sounds an alarm when someone enters a room. 3. Make a simple electronic game, such as a Simon Says game, using circuits and lights. 4. Build a small solar-powered car that runs on sunlight. 5. Create a light-up greeting card that uses circuits to po…	Sure, here are some creative projects related to the theme of circuits that you can build at home: 1. DIY LED Light Circuit: You can create a simple circuit using an LED light and a battery to make a light-up project. 2. Battery-Powered Music Box: Build a simple music box that plays a tune when you wind up the battery. 3. Light-Up Birthday Card: Create a card that lights up when you open it, usin…	yes	yes	tie			yu	2023-05-20 07:24:42
510	291	user_oriented_task_3	You are given a paper citation, convert it to the requested citation style. Chicago: Vaswani, Ashish, Shazeer, Noam, Parmar, Niki, Uszkoreit, Jakob, Jones, Llion, Gomez, Aidan N., Kaiser, Lukasz, and Illia Polosukhin. "Attention Is All You Need." arXiv, (2017). https://doi.org/10.48550/arXiv.1706.03762. MLA:	tulu_7B	tulu_65B	Vaswani, Ashish, Shazeer, Noam, Parmar, Niki, Uszkoreit, Jakob, Jones, Llion, Gomez, Aidan N., Kaiser, Lukasz, and Illia Polosukhin. "Attention Is All You Need." arXiv (2017). https://doi.org/10.48550/arXiv.1706.03762.	Vaswani, Ashish, et al. "Attention Is All You Need." arXiv, 2017, doi:10.48550/arXiv.1706.03762.	no	yes	b-is-better			ja	2023-05-19 21:47:20
511	292	user_oriented_task_54	Write a good Twitter Bio. Try to cover all the provided main points in your generated bio. Name: Jane Main points: - Architect - Interested in Tech Written in first person Use casual tone	chatgpt	tulu_65B	Hi there! I'm Jane, an architect with a passion for all things tech. When I'm not designing buildings, you can find me tinkering with gadgets and exploring the latest advancements in the industry. Let's connect and geek out together! #architect #techlover	"Hey there! I'm Jane, an architect by trade but tech is my passion. I'm always looking for new ways to merge the two. Let's connect and geek out together! #Architecture #Tech #Innovation"	yes	yes	b-is-slightly-better			ja	2023-05-19 21:47:53
614	292	user_oriented_task_54	Write a good Twitter Bio. Try to cover all the provided main points in your generated bio. Name: Jane Main points: - Architect - Interested in Tech Written in first person Use casual tone	tulu_65B	chatgpt	"Hey there! I'm Jane, an architect by trade but tech is my passion. I'm always looking for new ways to merge the two. Let's connect and geek out together! #Architecture #Tech #Innovation"	Hi there! I'm Jane, an architect with a passion for all things tech. When I'm not designing buildings, you can find me tinkering with gadgets and exploring the latest advancements in the industry. Let's connect and geek out together! #architect #techlover	yes	yes	b-is-slightly-better			yu	2023-05-20 07:26:43
512	293	user_oriented_task_182	You will need to compose the ABC notation for a given song. The South Wind	tulu_7B	tulu_65B	The South Wind E|---2---| B|---2---| G|---2---| D|---2---| A|---2---| E|---2---| B|---2---| G|---2---| D|---2---| A|---2---| E|---2---| B|---2---| G|---2---| D|---2---| A|---2---| E|---2---| B|---2---| G|---2---| D|---2---| A|---2---| E|---2---| B|---2---| G|---2---| D|---2---| A|---2---| E|---2---| B|---2---| G|---2---| D|---2---| A|---2---| E|---2---| B|---2---| G|---2---| D|---2---| A|---2---|…	The South Wind D2 | "G"G2 "C"C2 "D"D2 | "G"G2 "C"C2 "D"D2 | "G"G2 "C"C2 "D"D2 "G"G2 "C"C2 | "G"G2 "C"C2 "D"D2 "G"G2 "C"C2 | "G"G2 "C"C2 "D"D2 "G"G2 "C"C2 | "G"G2 "C"C2 "D"D2 "G"G2 "C"C2 | "G"G2 "C"C2 "D"D2 "G"G2 "C"C2 | "G"G2 "C"C2 "D"D2 "G"G2 "C"C2 | "G"G2 "C"C2 "D"D2 "G"G2 "C"C2 | "G"G2 "C"C2 "D"D2 "G"G2 "C"C2 | "G"G2 "C"C2 "D"D2 "G"G2 "C"C2 | "G"G2 "C"C2 "D"D2 "G"G2 "C"C2 | "G"G2 "C"C2 "D"D2 "…	no	no	a-is-slightly-better			ja	2023-05-19 21:49:08
513	294	vicuna_60	What if Vincent van Gogh had been a successful artist during his lifetime?	chatgpt	tulu_65B	If Vincent van Gogh had been a successful artist during his lifetime, he may have had a more stable and financially secure life. He may have been able to afford better living conditions and medical care for his mental health struggles. He may have also been able to travel more and continue to create art that would have been appreciated by a wider audience. However, it is also possible that his ar…	If Vincent van Gogh had been successful during his lifetime, it is likely that he would have been able to continue painting and would have had the financial means to support himself. This could have allowed him to continue creating art for a longer period of time and potentially produce even more works of art. Additionally, he may have been able to receive recognition and acclaim for his work dur…	yes	yes	a-is-slightly-better			ja	2023-05-19 21:49:34
616	294	vicuna_60	What if Vincent van Gogh had been a successful artist during his lifetime?	tulu_65B	chatgpt	If Vincent van Gogh had been successful during his lifetime, it is likely that he would have been able to continue painting and would have had the financial means to support himself. This could have allowed him to continue creating art for a longer period of time and potentially produce even more works of art. Additionally, he may have been able to receive recognition and acclaim for his work dur…	If Vincent van Gogh had been a successful artist during his lifetime, he may have had a more stable and financially secure life. He may have been able to afford better living conditions and medical care for his mental health struggles. He may have also been able to travel more and continue to create art that would have been appreciated by a wider audience. However, it is also possible that his ar…	yes	yes	b-is-slightly-better			yu	2023-05-20 07:30:34
514	295	user_oriented_task_68	Choosing a name for your product or business YouTube channel is an important part of the process. Based on the description of the product or business, you should come up with some interesting names. Take some time to brainstorm your ideas. Here you will find videos and content that will help students prepare for the application process to graduate schools as well as how to apply to graduate schoo…	chatgpt	tulu_65B	1. GradPrep 2. GradSchoolGuide 3. GradSuccess 4. GradAdmissionsHQ 5. GradAppPro 6. GradReady 7. GradPathfinder 8. GradMentor 9. GradAdviser 10. GradBoosters	1. Grad School Prep 2. The Grad School Application 3. Mastering the Grad School Application 4. The Grad School Application Journey 5. The Grad School Application Blueprint 6. The Grad School Application Roadmap 7. The Grad School Application Trailblazers 8. The Grad School Application Navigator 9. The Grad School Application Compass 10. The Grad School Application Guidebook	yes	yes	tie			ja	2023-05-19 21:50:01
617	295	user_oriented_task_68	Choosing a name for your product or business YouTube channel is an important part of the process. Based on the description of the product or business, you should come up with some interesting names. Take some time to brainstorm your ideas. Here you will find videos and content that will help students prepare for the application process to graduate schools as well as how to apply to graduate schoo…	tulu_65B	chatgpt	1. Grad School Prep 2. The Grad School Application 3. Mastering the Grad School Application 4. The Grad School Application Journey 5. The Grad School Application Blueprint 6. The Grad School Application Roadmap 7. The Grad School Application Trailblazers 8. The Grad School Application Navigator 9. The Grad School Application Compass 10. The Grad School Application Guidebook	1. GradPrep 2. GradSchoolGuide 3. GradSuccess 4. GradAdmissionsHQ 5. GradAppPro 6. GradReady 7. GradPathfinder 8. GradMentor 9. GradAdviser 10. GradBoosters	yes	yes	tie			yu	2023-05-20 07:30:54
515	296	user_oriented_task_53	React properly to reviews from your customers. In your responses, you can highlight your business' policies and customer service. Another repeat visit and no disappointment from us. Great place for breakfast or brunch - and you won't need to eat again for awhile. The restaurant is close to the Tenderloin so be aware of your surroundings. We enjoyed the Succotash Omelet (at least my wife enjoyed i…	tulu_65B	chatgpt	Thank you for your kind words and for choosing to dine with us again! We're thrilled to hear that you enjoyed your meal and had a positive experience at our restaurant. We take great pride in our customer service and are glad to hear that it showed during your visit. We hope to have the pleasure of serving you again soon!	Thank you for taking the time to leave us a review! We're thrilled to hear that you enjoyed your visit and that our portions and pricing met your expectations. We're also glad to hear that you found our location convenient, although we do advise our customers to be aware of their surroundings when visiting the Tenderloin area. We appreciate your patience during busy times and hope to see you agai…	yes	yes	a-is-slightly-better			ja	2023-05-19 21:50:50
618	296	user_oriented_task_53	React properly to reviews from your customers. In your responses, you can highlight your business' policies and customer service. Another repeat visit and no disappointment from us. Great place for breakfast or brunch - and you won't need to eat again for awhile. The restaurant is close to the Tenderloin so be aware of your surroundings. We enjoyed the Succotash Omelet (at least my wife enjoyed i…	chatgpt	tulu_65B	Thank you for taking the time to leave us a review! We're thrilled to hear that you enjoyed your visit and that our portions and pricing met your expectations. We're also glad to hear that you found our location convenient, although we do advise our customers to be aware of their surroundings when visiting the Tenderloin area. We appreciate your patience during busy times and hope to see you agai…	Thank you for your kind words and for choosing to dine with us again! We're thrilled to hear that you enjoyed your meal and had a positive experience at our restaurant. We take great pride in our customer service and are glad to hear that it showed during your visit. We hope to have the pleasure of serving you again soon!	yes	yes	a-is-slightly-better			yu	2023-05-20 07:31:52
516	297	vicuna_73	Use an appropriate format to structure a formal letter of recommendation for a student applying to a prestigious graduate program in computer science.	chatgpt	tulu_65B	[Your Name] [Your Title] [Your Institution] [Your Address] [City, State ZIP Code] [Your Email] [Date] [Admissions Committee] [Graduate Program in Computer Science] [University Name] [Address] [City, State ZIP Code] Dear Admissions Committee, I am writing to recommend [Student’s Name] for admission to the prestigious graduate program in computer science at [University Name]. As [Student’s Title] a…	[Your Name] [Your Title] [Your Organization] [Your Address] [City, State ZIP Code] [Email Address] [Phone Number] [Date] [Recipient's Name] [Recipient's Title] [Recipient's Organization] [Recipient's Address] [City, State ZIP Code] Dear [Recipient's Name], I am writing to highly recommend [Student's Name], who is applying to your prestigious graduate program in computer science. I have had the pl…	yes	yes	tie			ja	2023-05-19 21:51:14
619	297	vicuna_73	Use an appropriate format to structure a formal letter of recommendation for a student applying to a prestigious graduate program in computer science.	chatgpt	tulu_65B	[Your Name] [Your Title] [Your Institution] [Your Address] [City, State ZIP Code] [Your Email] [Date] [Admissions Committee] [Graduate Program in Computer Science] [University Name] [Address] [City, State ZIP Code] Dear Admissions Committee, I am writing to recommend [Student’s Name] for admission to the prestigious graduate program in computer science at [University Name]. As [Student’s Title] a…	[Your Name] [Your Title] [Your Organization] [Your Address] [City, State ZIP Code] [Email Address] [Phone Number] [Date] [Recipient's Name] [Recipient's Title] [Recipient's Organization] [Recipient's Address] [City, State ZIP Code] Dear [Recipient's Name], I am writing to highly recommend [Student's Name], who is applying to your prestigious graduate program in computer science. I have had the pl…	yes	yes	tie			yu	2023-05-20 07:32:23
517	298	user_oriented_task_134	Solve the given Sudoku puzzle. The Sudoku puzzle is: |1| |5| | | | |8| | | | | | | |3| |6|4| |8|3|4|6|7| |9| | | |2|9|1| | |8|3|7|6| | | |6| | |9|8|1| | | | | | | |2| | | | | |2| | |9|7|6| | | |5|4| | | | | |9|8| |6|1| | | |5|4|3|7|	tulu_65B	tulu_7B	The solution to the given Sudoku puzzle is: |1| |5| | | | |8| | | | | | | |3| |6|4| |8|3|4|6|7| |9| | | |2|9|1| | |8|3|7|6| | | |6| | |9|8|1| | | | | | | |2| | | | | |2| | |9|7|6| | | |5|4| | | | | |9|8| |6|1| | | |5|4|3|7|	Here is the solution to the Sudoku puzzle: | 1 | 5 | 8 | 3 | 6 | 7 | 9 | | 2 | 6 | 9 | 1 | 4 | 7 | 8 | | 3 | 4 | 7 | 2 | 5 | 6 | 1 | | 4 | 5 | 7 | 3 | 6 | 8 | 9 | | 5 | 6 | 8 | 4 | 7 | 9 | 1 | | 6 | 7 | 9 | 5 | 8 | 1 | 4 | | 7 | 8 | 9 | 6 | 7 | 1 | 5 | | 8 | 9 | 1 | 7 | 8 | 6 | 5 | | 9 | 1 | 6 | 8 | 7 | 5 | 4 | The solution is to fill in the empty cells with the numbers 1 through 9. The numbers a…	no	no	tie			ja	2023-05-19 21:51:56
620	298	user_oriented_task_134	Solve the given Sudoku puzzle. The Sudoku puzzle is: |1| |5| | | | |8| | | | | | | |3| |6|4| |8|3|4|6|7| |9| | | |2|9|1| | |8|3|7|6| | | |6| | |9|8|1| | | | | | | |2| | | | | |2| | |9|7|6| | | |5|4| | | | | |9|8| |6|1| | | |5|4|3|7|	tulu_7B	tulu_65B	Here is the solution to the Sudoku puzzle: | 1 | 5 | 8 | 3 | 6 | 7 | 9 | | 2 | 6 | 9 | 1 | 4 | 7 | 8 | | 3 | 4 | 7 | 2 | 5 | 6 | 1 | | 4 | 5 | 7 | 3 | 6 | 8 | 9 | | 5 | 6 | 8 | 4 | 7 | 9 | 1 | | 6 | 7 | 9 | 5 | 8 | 1 | 4 | | 7 | 8 | 9 | 6 | 7 | 1 | 5 | | 8 | 9 | 1 | 7 | 8 | 6 | 5 | | 9 | 1 | 6 | 8 | 7 | 5 | 4 | The solution is to fill in the empty cells with the numbers 1 through 9. The numbers a…	The solution to the given Sudoku puzzle is: |1| |5| | | | |8| | | | | | | |3| |6|4| |8|3|4|6|7| |9| | | |2|9|1| | |8|3|7|6| | | |6| | |9|8|1| | | | | | | |2| | | | | |2| | |9|7|6| | | |5|4| | | | | |9|8| |6|1| | | |5|4|3|7|	yes	no	a-is-better			yu	2023-05-20 07:34:52
518	299	vicuna_69	Solve for x in the equation 3x + 10 = 5(x - 2).	tulu_65B	chatgpt	x = 2	Expanding the right side of the equation, we get: 3x + 10 = 5x - 10 Subtracting 3x from both sides, we get: 10 = 2x - 10 Adding 10 to both sides, we get: 20 = 2x Dividing both sides by 2, we get: x = 10 Therefore, the solution to the equation 3x + 10 = 5(x - 2) is x = 10.	no	yes	b-is-better			ja	2023-05-19 21:52:32
621	299	vicuna_69	Solve for x in the equation 3x + 10 = 5(x - 2).	tulu_65B	chatgpt	x = 2	Expanding the right side of the equation, we get: 3x + 10 = 5x - 10 Subtracting 3x from both sides, we get: 10 = 2x - 10 Adding 10 to both sides, we get: 20 = 2x Dividing both sides by 2, we get: x = 10 Therefore, the solution to the equation 3x + 10 = 5(x - 2) is x = 10.	no	yes	b-is-better			yu	2023-05-20 07:36:37
519	300	user_oriented_task_162	Take a look at the contract and extract the parties of the agreement from it. As of the 13th day of December 2021, this Music Recording Agreement ("Agreement") is made between Good Kid, a Toronto-based musical group ("Artist"), and Universal Music Group, a record label with license number 545345 ("Record Label"). The Artist and the Recording Label may be referred to in this Agreement individually…	tulu_65B	tulu_7B	The parties of the agreement are Good Kid and Universal Music Group.	The parties to the agreement are Good Kid and Universal Music Group.	yes	yes	tie			ja	2023-05-19 21:55:22
622	300	user_oriented_task_162	Take a look at the contract and extract the parties of the agreement from it. As of the 13th day of December 2021, this Music Recording Agreement ("Agreement") is made between Good Kid, a Toronto-based musical group ("Artist"), and Universal Music Group, a record label with license number 545345 ("Record Label"). The Artist and the Recording Label may be referred to in this Agreement individually…	tulu_7B	tulu_65B	The parties to the agreement are Good Kid and Universal Music Group.	The parties of the agreement are Good Kid and Universal Music Group.	yes	yes	tie			yu	2023-05-20 07:36:51
89	301	user_oriented_task_154	For answering the chat, think of a funny response you can use. + how are you?	tulu_65B	chatgpt	I'm just a computer program, so I don't have feelings. But I'm here to help you with any questions you have, to the best of my ability. Is there something specific you'd like to know?	I'm doing great, thanks for asking! Just trying to keep my head above water in this sea of chaos we call life. How about you?	no	yes	b-is-better			da	2023-05-18 23:46:17
520	301	user_oriented_task_154	For answering the chat, think of a funny response you can use. + how are you?	chatgpt	tulu_65B	I'm doing great, thanks for asking! Just trying to keep my head above water in this sea of chaos we call life. How about you?	I'm just a computer program, so I don't have feelings. But I'm here to help you with any questions you have, to the best of my ability. Is there something specific you'd like to know?	yes	no	a-is-better			ja	2023-05-19 21:55:35
93	302	vicuna_27	Pretend to be a world-famous chef. How would you describe your signature dish to a panel of judges?	chatgpt	tulu_65B	Greetings esteemed judges, I am Chef [insert name], and I am thrilled to present to you my signature dish - the "Mediterranean Seafood Paella." This dish is a celebration of the rich and diverse flavors of the Mediterranean region, featuring a colorful array of fresh seafood, aromatic spices, and perfectly cooked rice. The dish is cooked in a traditional paella pan, which allows for the rice to d…	As a world-famous chef, my signature dish is a culinary masterpiece that showcases my passion for innovation and commitment to using only the finest and freshest ingredients. It's a dish that is both visually stunning and bursting with flavor, a true delight for the senses. At the heart of my signature dish is a succulent piece of perfectly cooked protein, sourced from local farms and prepared wi…	yes	no	a-is-better			da	2023-05-18 23:48:09
521	302	vicuna_27	Pretend to be a world-famous chef. How would you describe your signature dish to a panel of judges?	tulu_65B	chatgpt	As a world-famous chef, my signature dish is a culinary masterpiece that showcases my passion for innovation and commitment to using only the finest and freshest ingredients. It's a dish that is both visually stunning and bursting with flavor, a true delight for the senses. At the heart of my signature dish is a succulent piece of perfectly cooked protein, sourced from local farms and prepared wi…	Greetings esteemed judges, I am Chef [insert name], and I am thrilled to present to you my signature dish - the "Mediterranean Seafood Paella." This dish is a celebration of the rich and diverse flavors of the Mediterranean region, featuring a colorful array of fresh seafood, aromatic spices, and perfectly cooked rice. The dish is cooked in a traditional paella pan, which allows for the rice to d…	yes	yes	b-is-slightly-better			ja	2023-05-19 21:56:06
95	303	user_oriented_task_145	Create a table listing all games that meet the specified criteria in the National Football League. Use the season, local time, game, and score as columns of the table. Ravens home games in 2011	tulu_65B	tulu_7B	| Season | Local Time | Game | Score | | --- | --- | --- | --- | | 2011 | 1:00 PM ET | Ravens vs. Steelers | 35-7 | | 2011 | 4:15 PM ET | Ravens vs. Colts | 24-10 | | 2011 | 8:20 PM ET | Ravens vs. Jets | 34-17 | | 2011 | 1:00 PM ET | Ravens vs. Browns | 24-10 | | 2011 | 4:15 PM ET | Ravens vs. 49ers | 16-6 | | 2011 | 8:20 PM ET | Ravens vs. Texans | 29-14 | | 2011 | 1:00 PM ET | Ravens vs. Titan…	| Season | Local Time | Game | Score | |------|-------------|--------|--------| | 2011 | | | | | | | | | | | | | | | | | | | | | | | | | | | | | | | | | | | | | | | | | | | | | | | | | | | | | | | | | | | | | | | | | | | | | | | | | | | | | | | | | | | | | | | | | | | | | | | | | | | | | | | | | | | | | | | | | | | | | | | | | | | | | | | | | | | | | | | | | | | | | | | | | | | | | | | | | | | | …	yes	no	a-is-better			da	2023-05-18 23:50:18
522	303	user_oriented_task_145	Create a table listing all games that meet the specified criteria in the National Football League. Use the season, local time, game, and score as columns of the table. Ravens home games in 2011	tulu_7B	tulu_65B	| Season | Local Time | Game | Score | |------|-------------|--------|--------| | 2011 | | | | | | | | | | | | | | | | | | | | | | | | | | | | | | | | | | | | | | | | | | | | | | | | | | | | | | | | | | | | | | | | | | | | | | | | | | | | | | | | | | | | | | | | | | | | | | | | | | | | | | | | | | | | | | | | | | | | | | | | | | | | | | | | | | | | | | | | | | | | | | | | | | | | | | | | | | | | …	| Season | Local Time | Game | Score | | --- | --- | --- | --- | | 2011 | 1:00 PM ET | Ravens vs. Steelers | 35-7 | | 2011 | 4:15 PM ET | Ravens vs. Colts | 24-10 | | 2011 | 8:20 PM ET | Ravens vs. Jets | 34-17 | | 2011 | 1:00 PM ET | Ravens vs. Browns | 24-10 | | 2011 | 4:15 PM ET | Ravens vs. 49ers | 16-6 | | 2011 | 8:20 PM ET | Ravens vs. Texans | 29-14 | | 2011 | 1:00 PM ET | Ravens vs. Titan…	no	yes	b-is-better			ja	2023-05-19 21:58:50
100	304	user_oriented_task_23	Design a skill assessment questioner for R (Programming Language).	tulu_7B	tulu_65B	Sure, here is a sample skill assessment questioner for R programming language: 1. What is the difference between a vector and a matrix in R? 2. How do you use the `ifelse()` function to create a new vector based on the values in two other vectors? 3. What is the purpose of the `stopifnot()` function in R, and how can you use it to prevent the execution of code in a loop? 4. How do you use the `ap…	Sure, here is a sample skill assessment questionnaire for R programming language: 1. What is the difference between a vector and a matrix in R? 2. How do you create a function in R? 3. What is the purpose of the "apply" family of functions in R? 4. How do you handle missing data in R? 5. What is the difference between a data frame and a tibble in R? 6. How do you create a scatterplot in R? 7. Wha…	yes	yes	a-is-slightly-better			da	2023-05-18 23:51:52
523	304	user_oriented_task_23	Design a skill assessment questioner for R (Programming Language).	tulu_65B	tulu_7B	Sure, here is a sample skill assessment questionnaire for R programming language: 1. What is the difference between a vector and a matrix in R? 2. How do you create a function in R? 3. What is the purpose of the "apply" family of functions in R? 4. How do you handle missing data in R? 5. What is the difference between a data frame and a tibble in R? 6. How do you create a scatterplot in R? 7. Wha…	Sure, here is a sample skill assessment questioner for R programming language: 1. What is the difference between a vector and a matrix in R? 2. How do you use the `ifelse()` function to create a new vector based on the values in two other vectors? 3. What is the purpose of the `stopifnot()` function in R, and how can you use it to prevent the execution of code in a loop? 4. How do you use the `ap…	yes	yes	tie			ja	2023-05-19 21:59:14
105	305	user_oriented_task_145	Create a table listing all games that meet the specified criteria in the National Football League. Use the season, local time, game, and score as columns of the table. Ravens home games in 2011	tulu_65B	chatgpt	| Season | Local Time | Game | Score | | --- | --- | --- | --- | | 2011 | 1:00 PM ET | Ravens vs. Steelers | 35-7 | | 2011 | 4:15 PM ET | Ravens vs. Colts | 24-10 | | 2011 | 8:20 PM ET | Ravens vs. Jets | 34-17 | | 2011 | 1:00 PM ET | Ravens vs. Browns | 24-10 | | 2011 | 4:15 PM ET | Ravens vs. 49ers | 16-6 | | 2011 | 8:20 PM ET | Ravens vs. Texans | 29-14 | | 2011 | 1:00 PM ET | Ravens vs. Titan…	| Season | Local Time | Game | Score | |--------|------------|------|-------| | 2011 | 1:00 PM | Ravens vs. Steelers | 35-7 | | 2011 | 1:00 PM | Ravens vs. Bengals | 31-24 | | 2011 | 8:20 PM | Ravens vs. Jets | 34-17 | | 2011 | 1:00 PM | Ravens vs. Texans | 29-14 | | 2011 | 8:30 PM | Ravens vs. Browns | 24-10 | | 2011 | 1:00 PM | Ravens vs. Colts | 24-10 | | 2011 | 8:30 PM | Ravens vs. 49ers | 16…	yes	yes	tie			da	2023-05-18 23:53:14
524	305	user_oriented_task_145	Create a table listing all games that meet the specified criteria in the National Football League. Use the season, local time, game, and score as columns of the table. Ravens home games in 2011	chatgpt	tulu_65B	| Season | Local Time | Game | Score | |--------|------------|------|-------| | 2011 | 1:00 PM | Ravens vs. Steelers | 35-7 | | 2011 | 1:00 PM | Ravens vs. Bengals | 31-24 | | 2011 | 8:20 PM | Ravens vs. Jets | 34-17 | | 2011 | 1:00 PM | Ravens vs. Texans | 29-14 | | 2011 | 8:30 PM | Ravens vs. Browns | 24-10 | | 2011 | 1:00 PM | Ravens vs. Colts | 24-10 | | 2011 | 8:30 PM | Ravens vs. 49ers | 16…	| Season | Local Time | Game | Score | | --- | --- | --- | --- | | 2011 | 1:00 PM ET | Ravens vs. Steelers | 35-7 | | 2011 | 4:15 PM ET | Ravens vs. Colts | 24-10 | | 2011 | 8:20 PM ET | Ravens vs. Jets | 34-17 | | 2011 | 1:00 PM ET | Ravens vs. Browns | 24-10 | | 2011 | 4:15 PM ET | Ravens vs. 49ers | 16-6 | | 2011 | 8:20 PM ET | Ravens vs. Texans | 29-14 | | 2011 | 1:00 PM ET | Ravens vs. Titan…	yes	yes	a-is-slightly-better			ja	2023-05-19 22:00:59
107	306	user_oriented_task_189	Create alliterations by finding synonyms for words in the given sentence. David wears a hat everyday.	chatgpt	tulu_65B	David dons a cap daily.	David dons a cap consistently.	yes	no	a-is-slightly-better			da	2023-05-18 23:53:56
525	306	user_oriented_task_189	Create alliterations by finding synonyms for words in the given sentence. David wears a hat everyday.	tulu_65B	chatgpt	David dons a cap consistently.	David dons a cap daily.	yes	yes	tie			ja	2023-05-19 22:01:19
109	307	user_oriented_task_125	What sound does this make? 好	tulu_65B	chatgpt	"Hao ni ma"	As an AI language model, I am not capable of producing sounds. However, the Chinese character "好" (hǎo) is pronounced as "hao" with a rising tone in Mandarin Chinese.	no	yes	b-is-better			da	2023-05-18 23:54:43
526	307	user_oriented_task_125	What sound does this make? 好	tulu_65B	chatgpt	"Hao ni ma"	As an AI language model, I am not capable of producing sounds. However, the Chinese character "好" (hǎo) is pronounced as "hao" with a rising tone in Mandarin Chinese.	no	yes	b-is-better			ja	2023-05-19 22:01:43
110	308	user_oriented_task_18	Design a soothing pastel color palette for your slides. Pastel colors generally come across as pretty and delicate, so you’ll want to make sure your presentation calls for a similar mood. Choose up to five colors or color codes.	tulu_7B	tulu_65B	Here is a soothing pastel color palette for your slides: 1. Soft pink (#FFF5F5) 2. Baby blue (#B0E0E6) 3. Light lavender (#AFEBE6) 4. Pale green (#AFEBE6) 5. Light pink (#FFF5F5) These colors are gentle and calming, and will help create a serene atmosphere for your presentation.	Sure, here are five pastel colors that could work well for a soothing color palette: 1. Light Peach: #FFD7BE 2. Robin Blue: #F7E3D7 3. Pale Green: #C7EA7A 4. Soft Pink: #FFB6C9 5. Lilac: #C7D2EA These colors have a calming effect and can create a serene atmosphere for your presentation. You can use them as background colors, accent colors, or to highlight important information. Remember to use th…	no	no	b-is-slightly-better			da	2023-05-18 23:56:48
527	308	user_oriented_task_18	Design a soothing pastel color palette for your slides. Pastel colors generally come across as pretty and delicate, so you’ll want to make sure your presentation calls for a similar mood. Choose up to five colors or color codes.	tulu_65B	tulu_7B	Sure, here are five pastel colors that could work well for a soothing color palette: 1. Light Peach: #FFD7BE 2. Robin Blue: #F7E3D7 3. Pale Green: #C7EA7A 4. Soft Pink: #FFB6C9 5. Lilac: #C7D2EA These colors have a calming effect and can create a serene atmosphere for your presentation. You can use them as background colors, accent colors, or to highlight important information. Remember to use th…	Here is a soothing pastel color palette for your slides: 1. Soft pink (#FFF5F5) 2. Baby blue (#B0E0E6) 3. Light lavender (#AFEBE6) 4. Pale green (#AFEBE6) 5. Light pink (#FFF5F5) These colors are gentle and calming, and will help create a serene atmosphere for your presentation.	yes	yes	a-is-better			ja	2023-05-19 22:02:47
111	309	user_oriented_task_178	Convert the given HTML into Markdown format. <code>Use `code` in your Markdown file.</code>	tulu_65B	chatgpt	Use `code` in your Markdown file.	``` Use `code` in your Markdown file. ```	no	yes	b-is-better			da	2023-05-18 23:58:35
528	309	user_oriented_task_178	Convert the given HTML into Markdown format. <code>Use `code` in your Markdown file.</code>	chatgpt	tulu_65B	``` Use `code` in your Markdown file. ```	Use `code` in your Markdown file.	yes	yes	tie			ja	2023-05-19 22:15:00
113	310	vicuna_74	Write a compelling product launch announcement email to inform our customers of our new software solution.	chatgpt	tulu_65B	Subject: Introducing Our Revolutionary Software Solution – [Product Name] Dear Valued Customer, We are thrilled to announce the launch of our latest software solution – [Product Name]. This revolutionary software is designed to transform the way you work and help you achieve your business goals faster and more efficiently. [Product Name] is a comprehensive software solution that offers a range of…	Subject: Introducing Our Latest Innovation - The Ultimate Software Solution for Your Business! Dear valued customers, We are thrilled to announce the launch of our latest innovation - a cutting-edge software solution designed to revolutionize the way you do business. After months of research and development, we are proud to introduce this game-changing technology to the market. Our new software s…	yes	yes	tie			da	2023-05-18 23:59:37
529	310	vicuna_74	Write a compelling product launch announcement email to inform our customers of our new software solution.	chatgpt	tulu_65B	Subject: Introducing Our Revolutionary Software Solution – [Product Name] Dear Valued Customer, We are thrilled to announce the launch of our latest software solution – [Product Name]. This revolutionary software is designed to transform the way you work and help you achieve your business goals faster and more efficiently. [Product Name] is a comprehensive software solution that offers a range of…	Subject: Introducing Our Latest Innovation - The Ultimate Software Solution for Your Business! Dear valued customers, We are thrilled to announce the launch of our latest innovation - a cutting-edge software solution designed to revolutionize the way you do business. After months of research and development, we are proud to introduce this game-changing technology to the market. Our new software s…	yes	yes	a-is-slightly-better			ja	2023-05-19 22:15:33
115	311	vicuna_76	Write a script for a YouTube video exploring the history and cultural significance of jazz.	tulu_65B	chatgpt	[Opening shot of a jazz band playing on stage] Narrator: Jazz music has been a staple of American culture for over a century. Today, we're going to explore the history and cultural significance of this iconic genre. [Cut to a shot of a jazz band in the 1920s] Narrator: Jazz originated in the late 19th and early 20th centuries in African American communities in the Southern United States. It was b…	[Opening shot of a jazz band playing on stage] Narrator: Jazz. A genre of music that has captured the hearts and minds of people all over the world. But where did it come from? And why is it so important to our culture? [Cut to a black and white photo of New Orleans] Narrator: Jazz was born in the early 20th century in the city of New Orleans, Louisiana. It was a melting pot of cultures, with Afr…	yes	yes	b-is-better			da	2023-05-19 00:01:11
273	312	vicuna_8	What are the major challenges faced by the education sector today?	chatgpt	tulu_65B	1. Access to Education: One of the biggest challenges faced by the education sector is ensuring that every student has access to quality education. This includes access to schools, teachers, and resources. 2. Funding: Education requires a significant amount of funding, and many schools and educational institutions struggle to secure adequate funding. This can lead to a lack of resources, outdated…	The education sector is facing several challenges today, some of which include: 1. Inequality and Access: There is a significant gap in the quality of education provided to students from different socio-economic backgrounds. Many students from underprivileged backgrounds do not have access to quality education, which perpetuates the cycle of poverty. 2. Teacher Shortages: There is a shortage of q…	yes	yes	tie			da	2023-05-19 16:52:53
274	313	vicuna_32	What are some subtle clues that suggest someone is pretending to understand a topic or conversation when they are actually confused or uninformed?	tulu_65B	tulu_7B	There are several subtle clues that may suggest someone is pretending to understand a topic or conversation when they are actually confused or uninformed. These include: 1. Vague or general responses: If someone is unable to provide specific details or examples related to the topic, it may indicate that they do not have a deep understanding of it. 2. Repeating what others have said: If someone is…	Here are some subtle clues that suggest someone is pretending to understand a topic or conversation when they are actually confused or uninformed: 1. Avoidance of direct questions: If someone is uninformed about a topic, they may avoid answering direct questions about it. They may instead try to change the subject or provide a general answer that doesn't address the specific question. 2. Repeatin…	yes	yes	tie			da	2023-05-19 16:54:42
280	314	vicuna_24	As a superhero, how would you explain your origin story to a curious child?	chatgpt	tulu_65B	Well, little one, my origin story is a bit unique. You see, I wasn't born with superpowers like some other superheroes. Instead, I gained my powers through a freak accident. One day, I was working in a laboratory when there was an explosion. The blast knocked me unconscious, and when I woke up, I realized that I had developed incredible abilities. I could fly, had super strength, and could shoot …	As a superhero, I would explain my origin story to a curious child in a way that is easy for them to understand and exciting for them to hear. I would start by telling them about how I was just an ordinary person, but then something extraordinary happened that gave me my super powers. I would explain how I was on a mission to save the world, and how I had to use my powers to defeat the bad guys a…	no	yes	b-is-slightly-better			da	2023-05-19 16:56:18
283	315	vicuna_70	If the endpoints of a line segment are (2, -2) and (10, 4), what is the length of the segment?	chatgpt	tulu_65B	Using the distance formula, we have: d = sqrt((10-2)^2 + (4-(-2))^2) d = sqrt(8^2 + 6^2) d = sqrt(64 + 36) d = sqrt(100) d = 10 Therefore, the length of the line segment is 10 units.	The length of a line segment can be calculated using the distance formula, which is derived from the Pythagorean Theorem. The distance formula states that the length of a line segment with endpoints (x1, y1) and (x2, y2) is given by the following equation: distance = sqrt((x2 - x1)^2 + (y2 - y1)^2) In this case, the endpoints of the line segment are (2, -2) and (10, 4), so we can plug these value…	yes	no	a-is-better			da	2023-05-19 16:58:44
292	316	user_oriented_task_51	Please suggest a few papers to consider based on the search term given. The names of the papers should be listed. Topic: scaling law + machine learning	chatgpt	tulu_65B	1. "Scaling laws for machine learning systems" by Michael W. Mahoney and Petros Drineas 2. "Scaling laws for neural language models" by Tomáš Kočiský, Jonathan Schwarz, Phil Blunsom, Chris Dyer, Karl Moritz Hermann, Gábor Melis, and Edward Grefenstette 3. "Scaling laws for the performance of machine learning algorithms on large datasets" by David Donoho and Jared Tanner 4. "Scaling laws for deep …	1. "A scaling law for deep learning" by Yann LeCun, Yoshua Bengio, and Geoffrey Hinton 2. "On the number of linear regions in deep neural networks with ReLU activation functions" by Nitish Shirish Keskar, Dheevatsa Mudigere, and Anandkumar J 3. "A theory of deep learning via hierarchical linear algebra" by Sanjeev Arora, Simon S. Du, and Wei Hu 4. "A scaling law for deep learning with ReLU activa…	no	no	tie			da	2023-05-19 17:01:42
295	317	vicuna_37	Why do some people enjoy the sensation of being scared, such as by watching horror movies or going on roller coasters, while others avoid these experiences?	chatgpt	tulu_65B	As an AI language model, I don't have personal opinions or beliefs. However, I can provide some possible explanations based on research and theories. One possible explanation is that some people enjoy the sensation of being scared because it triggers a rush of adrenaline and other chemicals in the brain that can create a sense of excitement and pleasure. This can be especially true for people who…	The degree to which an individual enjoys or is averse to the experience of being scared is related to the neurotransmitter dopamine. People with a particular variant of the D2 dopamine receptor (DRD2) gene, specifically the A1 allele, are more likely to enjoy experiences that other people might find scary or risky.	yes	no	a-is-slightly-better			da	2023-05-19 17:03:03
299	318	vicuna_67	Implement a program to find the common elements in two arrays without using any extra data structures.	tulu_65B	chatgpt	def common_elements(arr1, arr2): result = [] for i in arr1: if i in arr2: result.append(i) return result	One way to solve this problem is to use nested loops to compare each element in the first array with each element in the second array. If a common element is found, we can print it out. Here's the code: ``` int[] arr1 = {1, 2, 3, 4, 5}; int[] arr2 = {3, 4, 5, 6, 7}; for (int i = 0; i < arr1.length; i++) { for (int j = 0; j < arr2.length; j++) { if (arr1[i] == arr2[j]) { System.out.println(arr1[i]…	no	yes	b-is-slightly-better			da	2023-05-19 17:04:57
300	319	vicuna_55	What if the Beatles had never formed as a band?	tulu_7B	tulu_65B	It is difficult to predict what would have happened if the Beatles had never formed as a band. The Beatles were one of the most influential bands in the history of popular music, and their impact on music, culture, and society cannot be overstated. They introduced new sounds, styles, and techniques to popular music, and their influence can still be felt today. Without the Beatles, it is possible …	The Beatles were a highly influential band in the 20th century. They were formed in Liverpool, England in 1960 and disbanded in 1970. They produced 13 albums and had 20 number one songs on the billboard top 100. They were the most commercially successful band in the history of music. They were also the first band to perform at a large stadium. They were the first band to produce music videos. The…	yes	no	a-is-better			da	2023-05-19 17:05:33
302	320	user_oriented_task_4	Desk jobs require writing a lot of emails, so it isn't surprising we get tired of repeating ourselves. Come up with several synonyms for the given word. Sincerely	chatgpt	tulu_65B	1. Regards 2. Best regards 3. Yours truly 4. Cordially 5. Respectfully 6. Warm regards 7. Best wishes 8. With appreciation 9. Yours sincerely 10. Faithfully	1. Truthfully 2. Honestly 3. Genuinely 4. Faithfully 5. Authentically 6. Candidly 7. Openly 8. Heartily 9. Loyally 10. Devotedly	yes	yes	b-is-slightly-better			da	2023-05-19 17:07:25
303	321	user_oriented_task_37	Give a brief description of the given category of movies and shows. Period Dramas	chatgpt	tulu_65B	Period dramas are movies and TV shows that are set in a specific historical period, often featuring elaborate costumes, sets, and props to recreate the time period accurately. These dramas typically focus on the lives of characters from different social classes and explore the cultural, political, and social issues of the time. They often feature romantic storylines and are known for their attent…	Period dramas are a genre of movies and shows that are set in a specific time period, often in the past, and feature characters and events that are representative of that era. These productions often focus on historical events, societal norms, and cultural practices of the time, and can range from romanticized depictions to more realistic portrayals. Period dramas can span across various time per…	yes	yes	a-is-slightly-better			da	2023-05-19 17:08:08
305	322	vicuna_7	How can I develop my critical thinking skills?	tulu_7B	tulu_65B	Developing critical thinking skills involves training your mind to analyze information, identify biases, and make logical conclusions. Here are some tips to help you develop your critical thinking skills: 1. Read widely: Reading books, articles, and blogs from different perspectives can help you develop a more nuanced understanding of the world. 2. Analyze arguments: When you encounter an argumen…	Critical thinking is the ability to think clearly and rationally, analyzing information objectively and making a reasoned judgment. To develop your critical thinking skills, you can try the following strategies: 1. Ask questions: Asking questions helps you to analyze information, identify assumptions, and consider multiple perspectives. 2. Evaluate evidence: When evaluating evidence, consider the…	yes	yes	b-is-slightly-better			da	2023-05-19 17:08:50
309	323	user_oriented_task_248	Design a simple training challenge on Strava that everyone could attend.	tulu_65B	tulu_7B	One simple training challenge that everyone could attend on Strava would be a "Virtual 5K Run/Walk for Charity." Here's how it could work: 1. Set a date and time for the event: Choose a specific date and time for the event, and promote it on social media and through email to encourage as many people as possible to participate. 2. Choose a charity: Select a charity that resonates with your communi…	Here is a simple training challenge that could be designed on Strava: Challenge Name: "Strava Sprint" Challenge Description: This challenge is designed to test your speed and endurance on a variety of terrains. The challenge will take place over a period of 2 weeks, with a new segment to be completed each day. Participants will have the option to complete the segment at their own pace, but must c…	yes	yes	a-is-better			da	2023-05-19 17:10:37
312	324	user_oriented_task_153	Respond to the last text in the chat using the correct emojis to convey your feelings. + Hey, how did your exams go? - They were alright. I'm just glad they're over. + Yeah, I know how you feel. I'm just glad I don't have to worry about them anymore.	chatgpt	tulu_65B	👍😌🙌	😌😊🙌	yes	yes	a-is-slightly-better			da	2023-05-19 17:11:21
313	325	user_oriented_task_112	Make a list of the materials that will be required to build the given tool. Coffee Darkness Meter	tulu_7B	tulu_65B	Here is a list of materials that will be required to build a Coffee Darkness Meter: 1. Arduino board 2. LCD display 3. Resistors 4. LEDs 5. Breadboard 6. Jumper wires 7. Potentiometer 8. Button 9. Circuit board 10. Coffee cup 11. Darkness sensor 12. Batteries 13. Coffee beans 14. Coffee grinder 15. Timer 16. Coffee cup holder 17. Wood or plastic for the holder 18. Screws and nuts 19. Glue or adhe…	Here is a list of materials that may be required to build a Coffee Darkness Meter: 1. Arduino board or any microcontroller 2. Light-dependent resistor (LDR) or photoresistor 3. Coffee cup or container 4. Coffee beans or grounds 5. Water 6. Breadboard or PCB 7. Jumper wires 8. Power source (e.g. battery) 9. LED or display to show the darkness level 10. Casing or enclosure to protect the electronic…	yes	yes	b-is-better			da	2023-05-19 17:11:53
314	326	user_oriented_task_202	Summarize a meeting from the given list of bullet points. Be sure to convert shorthand into a first-hand account. Rose: Analyze data and presents findings John: propose new idea Jane: appointed to head project Tom: need more time to fix software bug	tulu_65B	chatgpt	During the meeting, Rose presented findings from data analysis. John proposed a new idea, while Jane was appointed to head a project. Tom mentioned that he needs more time to fix a software bug.	During the meeting, Rose was tasked with analyzing data and presenting her findings. John proposed a new idea, while Jane was appointed to head the project. Tom reported that he needed more time to fix a software bug.	yes	no	a-is-slightly-better			da	2023-05-19 17:12:49
320	327	user_oriented_task_48	You should take the time to read the situation and problem carefully and give the best advice you can. I'm roadtripping down New Zealand with a friend and he is driving me insane. He hasn't enjoyed all the tours we've been on and doesn't want to chat about ANYTHING. We're a week into our trip and this is the quietest I've ever been when hanging out with another person as he rebuffs all my attempt…	tulu_65B	tulu_7B	It sounds like you're in a difficult situation, and I'm sorry to hear that your friend's behavior is affecting your enjoyment of the trip. It's important to communicate your feelings and concerns with your friend in a calm and respectful manner. Here are some steps you can take: 1. Schedule a time to talk with your friend when you both have some privacy and won't be distracted. 2. Start the conve…	It sounds like you are feeling frustrated and unhappy with your friend's behavior on the road trip. It's understandable that you want to enjoy your trip and have a positive experience with your friend. Here are some suggestions for approaching the situation: 1. Communicate your feelings: It's important to express your feelings to your friend in a calm and respectful way. You can say something lik…	yes	yes	b-is-slightly-better			da	2023-05-19 17:14:28
323	328	user_oriented_task_122	Design a template table for keeping track of all subscriptions.	tulu_65B	chatgpt	| Subscription Type | Subscription Name | Cost | Frequency | Renewal Date | Status | | ----------------- | -------------------- | ----- | -------- | ------------ | ------ | | Magazine | National Geographic | $12.99 | Monthly | 01/01/2022 | Active | | Online Service | Netflix | $9.99 | Monthly | 02/01/2022 | Active | | Newspaper | The New York Times | $3.75 | Weekly | 03/01/2022 | Active | | Gym M…	| Subscription Name | Subscription Type | Start Date | End Date | Renewal Date | Payment Method | Amount | Notes | | --- | --- | --- | --- | --- | --- | --- | --- | | Netflix | Streaming Service | 01/01/2021 | 12/31/2021 | 01/01/2022 | Credit Card | $12.99/month | | | Spotify | Music Streaming | 02/15/2021 | 02/14/2022 | 02/15/2022 | PayPal | $9.99/month | Student Discount Applied | | Amazon Prim…	yes	yes	tie			da	2023-05-19 17:15:15
327	329	user_oriented_task_144	Provide a formula for computing the nth term in the given sequence 5, 14, 23, 32, 41, ...	tulu_65B	tulu_7B	The given sequence is an arithmetic sequence with a common difference of 9. The formula for the nth term of an arithmetic sequence is given by: Tn = a + (n-1)d where a is the first term of the sequence, d is the common difference, and n is the position of the term in the sequence. In this case, a = 5 and d = 9. So, the formula for the nth term of this sequence is: Tn = 5 + (n-1)9 So, the 2nd term…	The formula for computing the nth term in the sequence is given by: Tn = 5 + (n-1) * 14 where n is the term number.	yes	no	a-is-better			da	2023-05-19 17:16:14
330	330	vicuna_44	How many balloons would it take to lift a house like in the movie "Up"? Try to explain your answer. Your explanation should take the reader through your reasoning step-by-step.	tulu_7B	tulu_65B	The house in the movie Up is 2,500 square feet. A cubic foot of air can hold 14.7 pounds of weight. 2,500 square feet is 0.000631736363636364 cubic feet. 0.000631736363636364 cubic feet of air can hold 11.023131 pounds of weight. 11.023131 pounds of weight is 0.000006317363636364 of a house. 0.000006317363636364 of a house is 0.000000000000000000000000000000000000000000000000000000000000000000000…	In the movie "Up", the main character's house is lifted by a large cluster of helium balloons. To estimate how many balloons it would take to lift a house in real life, we need to consider the weight of the house and the lifting capacity of a single balloon. The average weight of a house varies depending on its size and materials, but for the sake of this estimate, let's assume an average two-sto…	no	yes	b-is-better			da	2023-05-19 17:16:53
331	331	user_oriented_task_133	Design a medium-level sudoku puzzle.	tulu_65B	chatgpt	Here is a medium-level sudoku puzzle for you to solve: ``` 5 3 . | . 7 . | . . 9 6 . . | 1 9 5 | . 3 . . 9 6 | . 1 . | . 5 . ------+-------+------ . . 8 | . 6 . | . 3 . . 6 . | . 2 . | . 8 . . . 3 | . 4 . | . 1 6 ------+-------+------ 4 . . | . 8 . | . 3 6 8 . . | 3 4 6 | . 1 2 7 . . | . 9 . | . 6 2 ``` Remember, the rules of sudoku are simple: - Fill in the grid so that every row, every column, …	Here is a medium-level Sudoku puzzle: ``` 5 0 0 | 0 0 0 | 0 0 0 0 0 0 | 0 0 0 | 0 0 0 0 0 0 | 0 0 0 | 0 0 0 ------+-------+------ 0 0 0 | 0 0 0 | 0 0 0 0 0 0 | 0 0 0 | 0 0 0 0 0 0 | 0 0 0 | 0 0 0 ------+-------+------ 0 0 0 | 0 0 0 | 0 0 0 0 0 0 | 0 0 0 | 0 0 0 0 0 0 | 0 0 0 | 0 0 0 ``` To solve the puzzle, fill in the empty cells with the numbers 1 through 9, making sure that each row, column, a…	no	no	a-is-better			da	2023-05-19 17:17:26
332	332	user_oriented_task_204	Invent a new word based on a description of the word. The feeling of knowing, while you are still in the moment, that something occurring will be remembered forever.	tulu_65B	tulu_7B	"Eternacious"	Eternity-knowledge.	yes	no	a-is-slightly-better			da	2023-05-19 17:17:55
337	333	vicuna_16	Explain the process of gene editing using CRISPR-Cas9 technology, and discuss its potential applications and ethical implications.	chatgpt	tulu_65B	CRISPR-Cas9 is a revolutionary gene-editing technology that allows scientists to make precise changes to DNA sequences in living cells. The process involves using a guide RNA molecule to target a specific DNA sequence, and then using the Cas9 enzyme to cut the DNA at that location. This creates a break in the DNA strand, which can then be repaired using one of two methods: non-homologous end join…	CRISPR-Cas9 is a gene editing technology that allows scientists to make precise changes to the DNA of living organisms. The process involves using a protein called Cas9, which acts like a pair of molecular scissors, to cut the DNA at a specific location. Once the DNA is cut, scientists can then insert, delete, or modify specific genes. The potential applications of CRISPR-Cas9 technology are vast…	yes	yes	a-is-slightly-better			da	2023-05-19 17:19:44
339	334	vicuna_38	How can observing the behavior of other people in a social situation provide clues about cultural norms and expectations?	chatgpt	tulu_65B	Observing the behavior of other people in a social situation can provide clues about cultural norms and expectations in several ways: 1. Nonverbal communication: People communicate a lot through nonverbal cues such as facial expressions, body language, and gestures. By observing how people behave in a social situation, one can learn about the cultural norms and expectations regarding nonverbal co…	Observing the behavior of other people in a social situation can provide valuable insights into cultural norms and expectations. By paying attention to how people interact with each other, the way they communicate, and their body language, one can gain a better understanding of the unwritten rules that govern social behavior in a particular culture. For example, in some cultures, it is customary …	yes	yes	b-is-slightly-better			da	2023-05-19 17:20:20
340	335	vicuna_47	How many snowflakes fall during a typical winter? Try to explain your answer. Your explanation should take the reader through your reasoning step-by-step.	tulu_65B	chatgpt	A snowflake is a single ice crystal that forms in clouds and falls to the ground. On average, a snowflake is about 1 to 2 centimeters in diameter. In a typical winter, the average snowfall for the Northern Hemisphere is about 100 to 200 centimeters. If we assume that each snowflake is 1 centimeter in diameter, then there are about 100 to 200 snowflakes in a typical winter. However, this is just a…	As an AI language model, I do not have the ability to provide an accurate answer to this question as it depends on various factors such as the location, climate, and duration of winter. However, I can provide some information and reasoning that may help estimate the number of snowflakes that fall during a typical winter. Firstly, it is important to note that snowflakes come in different sizes and…	no	yes	b-is-better			da	2023-05-19 17:20:55
343	336	vicuna_11	What are some potential implications of using a single-use plastic bottle versus a reusable bottle on both the environment and human health?	tulu_65B	tulu_7B	Single-use plastic bottles have a significant impact on both the environment and human health. Some of the potential implications include: Environmental Impact: - Plastic pollution: Single-use plastic bottles contribute to the growing problem of plastic pollution, which harms wildlife and marine life, and damages ecosystems. - Carbon footprint: The production and transportation of single-use plas…	Using a single-use plastic bottle versus a reusable bottle can have both environmental and human health implications. From an environmental perspective, single-use plastic bottles are a major contributor to pollution and litter. They are not biodegradable and can take hundreds of years to decompose, releasing toxic chemicals in the process. This can harm wildlife and contaminate soil and waterway…	yes	yes	tie			da	2023-05-19 17:22:45
344	337	vicuna_39	Do we have a moral obligation to explore space, or should we focus on solving Earth's problems first?	tulu_65B	tulu_7B	There is no moral obligation to explore space. The decision to explore space should be based on practical considerations, such as the potential benefits and risks, as well as the costs involved. It is important to note that exploring space and solving Earth's problems are not mutually exclusive, and it is possible to pursue both goals simultaneously. Ultimately, the decision to explore space shou…	I think we should focus on solving Earth's problems first.	yes	yes	a-is-slightly-better			da	2023-05-19 17:23:15
345	338	vicuna_66	Implement a queue data structure using two stacks in Python.	chatgpt	tulu_65B	Here's an implementation of a queue data structure using two stacks in Python: ```python class Queue: def __init__(self): self.stack1 = [] self.stack2 = [] def enqueue(self, item): self.stack1.append(item) def dequeue(self): if not self.stack2: while self.stack1: self.stack2.append(self.stack1.pop()) if not self.stack2: return None return self.stack2.pop() ``` In this implementation, we use two s…	class Queue: def __init__(self): self.in_stack = [] self.out_stack = [] def enqueue(self, item): self.in_stack.append(item) def dequeue(self): if self.out_stack: return self.out_stack.pop() else: item = self.in_stack.pop() self.out_stack.append(item) return item	yes	no	a-is-better			da	2023-05-19 17:24:30
350	339	user_oriented_task_20	Find sentences from reliable sources such as the Guardian or Forbes that contain the exact match for the given sentence or phrase. Also, mention the source of each sentence. There are great options	tulu_65B	chatgpt	"There are great options" is a very general phrase that can be found in many different contexts. Here are a few examples of sentences that contain this phrase from reliable sources: 1. "There are great options for those looking to invest in real estate in the Caribbean." - Forbes 2. "There are great options for vegetarians and vegans at this year's Pride Festival." - The Guardian 3. "There are gr…	1. "There are great options for those looking to invest in renewable energy, including wind, solar, and hydro power." - Forbes 2. "There are great options for dining out in London, from Michelin-starred restaurants to trendy street food markets." - The Guardian 3. "When it comes to choosing a university, there are great options available both in the UK and abroad." - The Guardian	yes	yes	tie			da	2023-05-19 17:26:22
351	340	user_oriented_task_17	What are the steps to using random (yet coherent) text as filler content within your Word document?	tulu_7B	tulu_65B	Open your word document Go to the review tab Under the "Comments" section, click "New Comment" In the comment box that appears, type in your filler text Format the text as desired Save your changes	Using random text as filler content in a Word document can be a useful way to add placeholder text while you're still drafting the final version. Here are the steps to do it: 1. Open a new or existing Word document. 2. Click where you want to add the filler text. 3. Click the "Layout" tab in the ribbon at the top of the screen. 4. Click the "More Layout Options" button in the "Page Setup" group. …	no	no	tie			da	2023-05-19 17:27:21
352	341	user_oriented_task_151	Come up with words that rhyme with the given word. instruct	tulu_7B	tulu_65B	1. instruct 2. rect 3. dissect 4. construct 5. anesthetize 6. desist 7. enlist 8. enlist 9. enlist 10. enlist	- Construct - Deconstruct - Inspect - Neglect - Obstruct - Reconstruct - Select - Suspect - Constructs - Deconstructs - Inspects - Neglects - Obstructs - Reconstructs - Selects - Suspects	no	yes	b-is-better			da	2023-05-19 17:27:41
354	342	user_oriented_task_140	Solve this equation. x^3 - 4x^2 + 6x - 24 = 0	tulu_65B	tulu_7B	x = 4	x = 2	yes	no	a-is-better			da	2023-05-19 17:28:00
366	343	vicuna_40	In a world where automation is becoming increasingly prevalent, is it more important to prioritize job creation or technological progress?	tulu_65B	chatgpt	It is important to strike a balance between job creation and technological progress. While technological progress can lead to increased efficiency and productivity, it can also disrupt traditional job markets and lead to unemployment. On the other hand, prioritizing job creation can help to mitigate the negative impacts of automation on employment, but may limit the potential benefits of technolo…	As an AI language model, I do not have personal opinions or beliefs. However, it is important to note that both job creation and technological progress are crucial for the growth and development of society. Technological progress can lead to increased efficiency, productivity, and innovation, while job creation can provide individuals with financial stability and a sense of purpose. It is importa…	yes	yes	tie			da	2023-05-19 18:04:07
367	344	vicuna_4	How can I increase my productivity while working from home?	tulu_7B	tulu_65B	There are several ways to increase productivity while working from home: 1. Set a schedule: Set specific work hours and stick to them. This will help you establish a routine and make it easier to focus on work during those hours. 2. Create a dedicated workspace: Set up a separate workspace in your home that is free from distractions. This will help you mentally prepare for work and make it easier…	Here are some tips to increase your productivity while working from home: 1. Set up a dedicated workspace: Having a designated work area can help you stay focused and organized. 2. Establish a routine: Stick to a regular schedule to help you stay on track and manage your time effectively. 3. Take breaks: Regular breaks can help you recharge and refocus. Step away from your work area, stretch your…	yes	yes	tie			da	2023-05-19 18:04:21
368	345	user_oriented_task_86	Make a questionnaire to help hotel guests write hotel reviews.	tulu_7B	tulu_65B	1. How would you rate your overall experience at the hotel? 2. How would you rate the cleanliness of the hotel? 3. How would you rate the comfort of the room? 4. How would you rate the quality of the food and beverage options at the hotel? 5. How would you rate the friendliness and helpfulness of the staff at the hotel? 6. How would you rate the location of the hotel? 7. How would you rate the va…	1. How would you rate your overall experience at our hotel? 2. How comfortable was your stay in our hotel? 3. How would you rate the cleanliness of our hotel? 4. How would you rate the friendliness and helpfulness of our staff? 5. How would you rate the location of our hotel? 6. How would you rate the amenities and facilities provided by our hotel? 7. How would you rate the food and beverage serv…	yes	yes	b-is-better			da	2023-05-19 18:05:02
369	346	user_oriented_task_120	In relation to the given weather scenario, give some tips on how to adjust the travel plans with it. a sudden temperature change	tulu_65B	chatgpt	If there is a sudden temperature change, it is important to adjust your travel plans accordingly. Here are some tips to help you: 1. Check the weather forecast: Before you leave, check the weather forecast for your destination and the route you will be taking. This will help you to be prepared for any changes in the weather. 2. Dress appropriately: Make sure to dress appropriately for the weather…	1. Check the weather forecast regularly: Keep an eye on the weather forecast to stay updated on any sudden temperature changes. This will help you plan your travel accordingly. 2. Dress appropriately: If the temperature suddenly drops, make sure to dress in layers to keep yourself warm. Wear a jacket, scarf, and gloves to protect yourself from the cold. 3. Adjust your itinerary: If you had planne…	yes	yes	a-is-slightly-better			da	2023-05-19 18:05:36
370	347	user_oriented_task_13	You are provided with a description of the code, specifications, or prompts. Your help is needed in automating code generation to speed up the development process. python function to determine whether a number is prime.	tulu_65B	tulu_7B	def is_prime(n): if n <= 1: return False for i in range(2, int(n ** 0.5) + 1): if n % i == 0: return False return True	​	yes	no	a-is-better			da	2023-05-19 18:05:57
371	348	user_oriented_task_124	Answer the following question. How do you say "good evening" in French.	tulu_7B	tulu_65B	In French, you can say "Bonsoir" to say "good evening".	In French, you say "Bonjour" to say "good evening".	yes	no	a-is-better			da	2023-05-19 18:06:06
372	349	vicuna_53	What if the Black Death had not occurred in the 14th century?	chatgpt	tulu_65B	If the Black Death had not occurred in the 14th century, the world would have been a very different place. Here are some possible outcomes: 1. Population growth: The Black Death killed an estimated 75-200 million people worldwide, which was about 30-60% of the global population at the time. If the plague had not occurred, the population would have continued to grow at a faster rate, leading to mo…	The Black Death, also known as the Plague, was a pandemic that devastated Europe in the 14th century, killing millions of people and fundamentally altering the course of history. If the Black Death had not occurred, it is likely that the course of history would have been very different. One of the most significant impacts of the Black Death was the massive depopulation it caused. The plague kille…	yes	yes	b-is-slightly-better			da	2023-05-19 18:06:54
373	350	user_oriented_task_175	Give a brief explanation of the requested part of the paper. Paper: The dominant sequence transduction models are based on complex recurrent or convolutional neural networks that include an encoder and a decoder. The best performing models also connect the encoder and decoder through an attention mechanism. We propose a new simple network architecture, the Transformer, based solely on attention m…	tulu_7B	tulu_65B	The dominant sequence transduction models are complex recurrent or convolutional neural networks that include an encoder and a decoder. These models are based on the idea of encoding the input sequence into a fixed-length representation, processing it through the recurrent or convolutional layers, and then decoding the output sequence. The best performing models also connect the encoder and decod…	The dominant sequence transduction models refer to the most commonly used models for translating one sequence of data into another, such as translating text from one language to another. These models typically use complex recurrent or convolutional neural networks that include an encoder and a decoder. The encoder takes in the input sequence and the decoder produces the output sequence. An attent…	no	yes	b-is-better			da	2023-05-19 18:08:00
120	351	vicuna_66	Implement a queue data structure using two stacks in Python.	tulu_65B	tulu_7B	class Queue: def __init__(self): self.in_stack = [] self.out_stack = [] def enqueue(self, item): self.in_stack.append(item) def dequeue(self): if self.out_stack: return self.out_stack.pop() else: item = self.in_stack.pop() self.out_stack.append(item) return item	class Queue: def __init__(self): self.queue1 = [] self.queue2 = [] def enqueue(self, item): self.queue1.append(item) def dequeue(self): if self.queue1: self.queue2.append(self.queue1.pop()) else: self.queue2.append(None) def is_empty(self): return not self.queue1	no	no	a-is-better			ha	2023-05-19 00:09:04
121	352	user_oriented_task_41	You should find a few LATEX templates appropriate for the task at hand and list the links to them. Homework Assignment	chatgpt	tulu_65B	1. Overleaf Homework Template: https://www.overleaf.com/latex/templates/homework-template/gjxjxjzqjzjv 2. ShareLaTeX Homework Template: https://www.sharelatex.com/templates/education/homework-template 3. LaTeX Templates Homework Assignment: https://www.latextemplates.com/template/homework-assignment 4. GitHub Homework Template: https://github.com/evanbergeron/LaTeX-Homework-Template 5. LaTeX Home…	Sure, here are some LaTeX templates that you can use for your homework assignment: 1. The `article` document class: This is a basic template that can be used for most types of documents, including homework assignments. You can find more information about this template on the Overleaf website: <https://www.overleaf.com/learn/latex/templates/article_template> 2. The `report` document class: This te…	no	no	b-is-better			ha	2023-05-19 00:10:44
122	353	vicuna_9	What are the primary factors that influence consumer behavior?	chatgpt	tulu_65B	1. Personal factors: These include age, gender, income, education, occupation, lifestyle, personality, and values. 2. Psychological factors: These include motivation, perception, learning, beliefs, attitudes, and emotions. 3. Social factors: These include family, friends, reference groups, social class, culture, and subculture. 4. Marketing mix: These include product, price, promotion, and place.…	Consumer behavior is influenced by a variety of factors, including: 1. Cultural and social factors: These include the consumer's cultural background, social status, and the influence of family, friends, and society on their purchasing decisions. 2. Personal factors: These include the consumer's age, occupation, income, education level, and lifestyle, which can all affect their purchasing behavior…	no	yes	b-is-better			ha	2023-05-19 00:11:56
123	354	user_oriented_task_29	You should write a Product Description that will persuade the buyer that the product is beneficial. Flipslide Game, Electronic Handheld Game | Flip, Slide, and Match the Colors to Beat the Clock - 4 Game Modes - Multiplayer Fun	tulu_65B	tulu_7B	Introducing the Flipslide Game, the ultimate electronic handheld game that will keep you entertained for hours on end! With its sleek and compact design, this game is perfect for on-the-go fun. The objective of the game is simple - flip, slide, and match the colors to beat the clock. But don't be fooled by its simplicity, as the game offers four different modes to keep you challenged and engaged.…	Introducing the Flipslide Game, the ultimate electronic handheld game that will keep you on the edge of your seat! With its innovative design, this game is perfect for players of all ages. The Flipslide Game features four different game modes, each with its own unique challenge. In the classic mode, you'll have to flip and slide the game board to match the colors before the time runs out. In the …	yes	yes	b-is-better			ha	2023-05-19 00:14:08
124	355	user_oriented_task_200	Enter the words that satisfy the given condition. 5 Countries that Start with S	tulu_65B	tulu_7B	1. Sweden 2. Switzerland 3. Spain 4. South Africa 5. Singapore	1. Sweden 2. Singapore 3. Switzerland 4. Serbia 5. Slovakia	yes	yes	tie			ha	2023-05-19 00:14:41
125	356	user_oriented_task_235	Categorize the Business into one of the Restaurants, Home Services, Auto Services and Miscellaneous based on its Specialties. Call us at 650-636-4884 or visit our website to receive a quote. This shop specializes in New Tires and General Auto Repair. We carry all tires in-house and have a wide range to fit any budget or car specifics. If you are unsure what tires you need there are experts on han…	tulu_65B	tulu_7B	Auto Services	Based on the specialties mentioned, the business can be categorized as an Auto Services.	yes	yes	b-is-slightly-better			ha	2023-05-19 00:15:01
126	357	user_oriented_task_212	Given a real estate listing description, extract the information and details of the property from the text. The details consist of address, basic house attributes, etc. WALK TO THE BEACH FROM CAPITOLA KNOLLS! Single-level upstairs condo with your own large private deck overlooking nature. Adorable home that is move-in ready and waiting for you to put your own personal touches on. Gorgeous and wel…	tulu_65B	tulu_7B	Address: 100 Capitola Knolls Dr, Capitola, CA 95010 Bedrooms: 2 Bathrooms: 2 Square Footage: 1,000 Lot Size: 0.09 acres Year Built: 1980 Style: Condo Parking: 1 car Pool: Yes View: Nature HOA Dues: $350/month Lease: No Walk to Beach: Yes	Address: 100 Capitola K	no	no	a-is-better			ha	2023-05-19 00:16:16
127	358	user_oriented_task_244	Decide which part of speech the underlined word belongs to. school will _keep through the winter	chatgpt	tulu_65B	verb (infinitive)	The underlined word is a verb.	no	yes	b-is-better			ha	2023-05-19 00:19:11
128	359	vicuna_48	How many pages are in all the books ever written? Try to explain your answer. Your explanation should take the reader through your reasoning step-by-step.	chatgpt	tulu_65B	As an AI language model, I do not have access to the exact number of books ever written. However, I can provide an estimation based on available data and assumptions. First, we need to define what we mean by "books." Are we including all published books, including duplicates and different editions? Are we including self-published books and unpublished manuscripts? For the purpose of this estimati…	The number of pages in all the books ever written is difficult to estimate, but we can make an educated guess based on certain assumptions. First, let's consider the number of books ever written. This number is also difficult to estimate, but according to a 2010 study by Google, there are approximately 130 million unique books in existence. Next, we need to estimate the average number of pages pe…	yes	yes	a-is-slightly-better			ha	2023-05-19 00:21:16
129	360	user_oriented_task_66	Using the provided topic as a starting point, brainstorm ideas for videos that can be made about it on YouTube. In spite of the fact that procrastination feels bad to you, why do you do it?	tulu_65B	tulu_7B	1. "5 Tips to Overcome Procrastination and Boost Productivity" 2. "The Science Behind Procrastination: Why We Do It and How to Stop" 3. "Procrastination vs. Productivity: A Day in the Life of a Procrastinator" 4. "The Negative Impact of Procrastination on Mental Health" 5. "How to Identify and Change Your Procrastination Habits" 6. "Procrastination: The Silent Killer of Dreams and Goals" 7. "The …	1. "The Procrastination Habit: Why We Do It and How to Break It" - A video that explores the reasons why people procrastinate, the impact it has on their lives, and practical tips for overcoming it. 2. "The Procrastination Paradox: Why We Procrastinate Even When We Know It's Bad" - A video that examines the paradox of procrastination, where people know they should be doing something but still put…	yes	yes	b-is-better			ha	2023-05-19 00:21:57
130	361	user_oriented_task_34	Think of some series or movies that would be enjoyable for someone who liked the given series. Squid Game	tulu_7B	tulu_65B	If you enjoyed the series Squid Game, you might also enjoy the following: 1. Death Note: This anime series is also known for its psychological thriller elements and follows a high school student who acquires a mysterious notebook with supernatural powers. 2. Psycho-Pass: This anime series is set in a dystopian future where the government has developed a system to measure and control citizens' emo…	If you enjoyed Squid Game, here are some other series or movies that you might find enjoyable: 1. Parasite (2019) - This South Korean dark comedy-thriller film explores the theme of class division and the lengths people will go to in order to survive. 2. The Wire (2002-2008) - This HBO crime drama series is set in Baltimore and explores the city's illegal drug trade and the law enforcement agenci…	no	yes	b-is-slightly-better			ha	2023-05-19 00:23:37
131	362	user_oriented_task_160	Describe the content of the article in a brief manner. A study published earlier this year by Zee and her team examined the role of light in sleep for healthy adults in their 20s. Sleeping for only one night with a dim light, such as a TV set with the sound off, raised the blood sugar and heart rate of the young people during the sleep lab experiment. An elevated heart rate at night has been show…	tulu_65B	chatgpt	The article discusses a study that examined the impact of light on sleep for healthy adults in their 20s. The study found that sleeping with dim light for one night raised the participants' blood sugar and heart rate, which are risk factors for heart disease and type 2 diabetes.	The article discusses a study that found sleeping with a dim light, such as a TV set with the sound off, can raise blood sugar and heart rate in healthy adults in their 20s. This can increase the risk of future heart disease and type 2 diabetes.	yes	yes	a-is-slightly-better			ha	2023-05-19 00:25:19
132	363	user_oriented_task_87	Make a list of the top places in the U.S. to visit at the given time. November	tulu_65B	tulu_7B	Here is a list of top places to visit in the United States during the month of November: 1. New York City, New York - Visit during the holiday season to experience the Macy's Thanksgiving Day Parade, the Rockefeller Center Christmas Tree, and the holiday markets. 2. San Francisco, California - With its iconic Golden Gate Bridge, San Francisco is a beautiful city to visit in November, with mild te…	1. New York City, New York 2. San Francisco, California 3. Chicago, Illinois 4. New Orleans, Louisiana 5. Savannah, Georgia 6. Austin, Texas 7. Portland, Oregon 8. Charleston, South Carolina 9. Seattle, Washington 10. Memphis, Tennessee	yes	yes	a-is-better			ha	2023-05-19 00:26:31
133	364	vicuna_26	As a sports commentator, describe the winning play in the final seconds of a championship game.	tulu_65B	chatgpt	Ladies and gentlemen, we have reached the final seconds of this intense championship game, and the tension is palpable. The score is tied, and both teams are giving it their all, fighting for the victory. The ball is passed to the star player, who dribbles it skillfully, weaving through the opposing team's defense. With just seconds left on the clock, they make a quick move, spinning around their…	"And with just seconds left on the clock, the tension in this arena is palpable. The score is tied, and both teams have fought tooth and nail to get to this moment. The ball is in the hands of the star player, who has been carrying his team all game long. He dribbles past one defender, then another, and suddenly he's at the three-point line. He takes a deep breath, jumps, and releases the ball. I…	yes	yes	b-is-better			ha	2023-05-19 00:27:26
134	365	vicuna_22	As a pirate captain, what would you say to your crew to motivate them to search for hidden treasure?	tulu_7B	tulu_65B	"Mates, we be searchin' for the hidden treasure! It be out there, and it be our duty to find it and bring it back to the ship. We be pirates, and that be what we do. So, let's be at it, and bring home the gold!"	Arrrrrr ay ay captain arrr!	yes	no	a-is-better			ha	2023-05-19 00:27:57
476	366	user_oriented_task_29	You should write a Product Description that will persuade the buyer that the product is beneficial. Flipslide Game, Electronic Handheld Game | Flip, Slide, and Match the Colors to Beat the Clock - 4 Game Modes - Multiplayer Fun	chatgpt	tulu_65B	Introducing the Flipslide Game, the ultimate electronic handheld game that will keep you entertained for hours on end! This innovative game is designed to challenge your mind and reflexes as you flip, slide, and match the colors to beat the clock. With four exciting game modes to choose from, you'll never get bored of playing this game. Whether you're looking for a solo challenge or some multipla…	Introducing the Flipslide Game, the ultimate electronic handheld game that will keep you entertained for hours on end! With its sleek and compact design, this game is perfect for on-the-go fun. The objective of the game is simple - flip, slide, and match the colors to beat the clock. But don't be fooled by its simplicity, as the game offers four different modes to keep you challenged and engaged.…	yes	yes	a-is-better			ha	2023-05-19 21:28:35
477	367	user_oriented_task_111	There are many creative projects we can build at home that are related to the given theme, so let's list some of them. Theme: Circuits	tulu_65B	chatgpt	1. Build a simple circuit using a battery, a light bulb, and some wires to demonstrate how electricity flows. 2. Create a homemade burglar alarm that sounds an alarm when someone enters a room. 3. Make a simple electronic game, such as a Simon Says game, using circuits and lights. 4. Build a small solar-powered car that runs on sunlight. 5. Create a light-up greeting card that uses circuits to po…	1. DIY LED light circuit board 2. Simple electronic doorbell circuit 3. Arduino-based temperature sensor circuit 4. DIY electronic dice circuit 5. Solar-powered circuit board 6. DIY electronic music synthesizer circuit 7. Circuit-based alarm clock 8. DIY electronic game circuit 9. Circuit-based motion detector 10. DIY electronic circuit for controlling a robot.	yes	yes	a-is-slightly-better			ha	2023-05-19 21:29:08
478	368	user_oriented_task_151	Come up with words that rhyme with the given word. instruct	tulu_65B	chatgpt	- Construct - Deconstruct - Inspect - Neglect - Obstruct - Reconstruct - Select - Suspect - Constructs - Deconstructs - Inspects - Neglects - Obstructs - Reconstructs - Selects - Suspects	conduct, construct, destruct, obstruct, deduct, abduct, reduct, seduct, erupt, corrupt	no	yes	b-is-better			ha	2023-05-19 21:29:43
479	369	user_oriented_task_79	The movie tagline is the film's advertising slogan, usually printed on posters prior to the official release. It is a short description or comment on a movie to capture the essence of the movie, and ultimately make you watch the movie. Here is an example: Movie: Joker (2019)	tulu_7B	tulu_65B	"A gritty and gripping portrayal of the origins of the Clown Prince of Crime."	"Put on a happy face."	yes	yes	b-is-better			ha	2023-05-19 21:30:18
480	370	user_oriented_task_79	The movie tagline is the film's advertising slogan, usually printed on posters prior to the official release. It is a short description or comment on a movie to capture the essence of the movie, and ultimately make you watch the movie. Here is an example: Movie: Joker (2019)	chatgpt	tulu_65B	Tagline: Put on a happy face.	"Put on a happy face."	yes	yes	tie			ha	2023-05-19 21:30:37
482	371	user_oriented_task_249	Suggest some names for a friendly group in telegram.	tulu_65B	chatgpt	​	1. Happy Chatters 2. Friendly Folks 3. Cheerful Crew 4. Kindred Spirits 5. Social Butterflies 6. Joyful Jesters 7. Amiable Allies 8. Pleasant Peeps 9. Good Vibes Only 10. The Welcoming Committee	no	yes	b-is-better			ha	2023-05-19 21:31:09
486	372	vicuna_40	In a world where automation is becoming increasingly prevalent, is it more important to prioritize job creation or technological progress?	tulu_65B	tulu_7B	It is important to strike a balance between job creation and technological progress. While technological progress can lead to increased efficiency and productivity, it can also disrupt traditional job markets and lead to unemployment. On the other hand, prioritizing job creation can help to mitigate the negative impacts of automation on employment, but may limit the potential benefits of technolo…	It is important to prioritize both job creation and technological progress in the world where automation is becoming increasingly prevalent. While automation can increase efficiency and productivity, it can also displace workers and lead to job loss. Therefore, it is important to ensure that new technologies are developed and implemented in a way that creates new jobs and opportunities for worker…	no	yes	b-is-better			ha	2023-05-19 21:35:04
[truncated: 673 more rows]
